# Supplementary material for: Copper-catalyzed synthesis of 1-(2-benzofuryl)-N-heteroarenes from o-hydroxy-gem-(dibromovinyl)benzenes and N-heteroarenes
Source: Royal Society of Chemistry journal article supplement (doi:10.1039/d1ob01765a), 2021-01-01
Supplement: d1ob01765a1.pdf [file d1ob01765a1.pdf]

# Copper-catalyzed synthesis of 1-(2-benzofuryl)-*N*-heteroarenes from *o*-hydroxy-*gem*-(dibromovinyl)benzenes and *N*-heteroarenes

Maddali L. N. Rao,\* Sk Shamim Islam

Department of Chemistry, Indian Institute of Technology Kanpur, Kanpur 208 016, India

[maddali@iitk.ac.in](mailto:maddali@iitk.ac.in)

## Supporting Information

| <i>Table of Contents</i>                                                   | <i>Page No</i> |
|----------------------------------------------------------------------------|----------------|
| 1. General information.....                                                | S02            |
| 2. Synthesis of <i>o</i> -hydroxy- <i>gem</i> -(dibromovinyl)benzenes..... | S02            |
| 3. Synthesis of 1-(2-benzofuryl)- <i>N</i> -heteroarenes .....             | S02-03         |
| 4. Synthesis of benzofuro-indolo-pyridines.....                            | S03            |
| 5. Characterization data.....                                              | S04-08         |
| 6. Crystallographic data.....                                              | S8-10          |
| 7. References.....                                                         | S10            |
| 8. <sup>1</sup> H NMR and <sup>13</sup> C NMR spectra.....                 | S11-60         |
| 9. HRMS spectra.....                                                       | S61-85         |

## 1. General information

All reactions were performed in Schlenk tubes using dry solvents under a nitrogen atmosphere. The *o*-hydroxy-*gem*-(dibromovinyl)benzenes were prepared from salicylaldehyde following the literature method.<sup>1</sup> Purification of the products was performed using 100-200 mesh silica-gel using ethyl acetate/hexane as eluent. <sup>1</sup>H NMR and <sup>13</sup>C NMR spectra were recorded with JEOL ECS 400 (400 MHz) and 500 (500 MHz). HRMS measurements have been recorded using Electron Ionization (EI) and Electrospray Ionization (ESI) techniques with Waters CAB155 GCT Premier analyzer and Waters HAB 213 Q-TOF Premier analyzer. IR spectra were recorded with PerkinElmer FT-IR. X-ray data were taken from Bruker SMART APEX-II CCD diffractometer.

## 2. Synthesis of *o*-hydroxy-*gem*-(dibromovinyl)benzenes

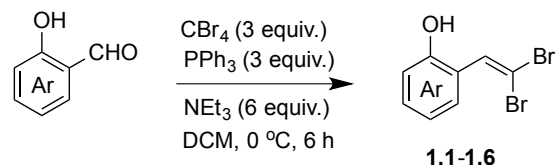

In a three-neck 250 mL round-bottom flask, PPh<sub>3</sub> (66.18 mmol, 6 equiv) was taken in dichloromethane (15 mL) under a nitrogen atmosphere. The vessel was cooled to 0 °C, after which a solution of CBr<sub>4</sub> (33.24 mmol, 3 equiv) in dichloromethane (15 mL) was added. After 10 minutes, triethylamine (66.18 mmol, 6 equiv) was added dropwise and stirred for additional 5 minutes. After that, salicylaldehyde (11.03 mmol, 1 equiv) in dichloromethane (10 mL) was added dropwise and the reaction mixture was stirred for 6 h at 0 °C. After that, hexane was added to the mixture and filtered through a silica gel column. The solvent was concentrated and the crude was purified by silica gel column chromatography using hexane as eluent.

## 3. Synthesis of of 1-(2-benzofuryl)-*N*-heteroarenes

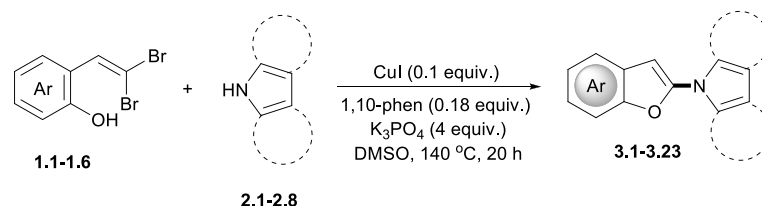

To an oven-dried Schlenk tube, *o*-hydroxy-*gem*-(dibromovinyl)benzene (0.375 mmol, 1 equiv.), K<sub>3</sub>PO<sub>4</sub> (1.5 mmol, 4 equiv.), *N*-heteroarene (1.125 mmol, 3 equiv.), CuI (0.037 mmol, 0.1 equiv.), 1,10-phen (0.067 mmol, 0.18 equiv.) and DMSO (3 mL) were added

under nitrogen atmosphere. The reaction mixture was stirred in a pre-heated oil bath at 140 °C for 20 h. After that, the product was extracted with ethyl acetate (30 mL), washed with water (10 mL) and brine solution (10 mL). The organic extract was dried over anhydrous MgSO<sub>4</sub> and concentrated. The crude was purified by column chromatography using ethyl acetate/hexane as eluent.

### Procedure for higher scale synthesis of 1-(2-benzofuryl)-*N*-heteroarenes 3.1 and 3.3

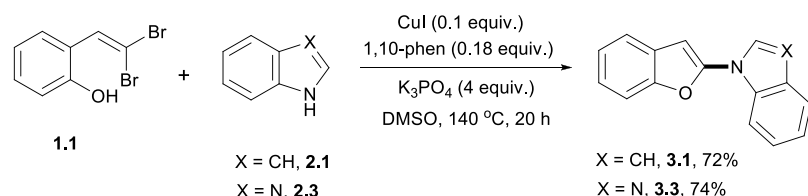

To an oven-dried Schlenk tube, *o*-hydroxy-*gem*-(dibromovinyl)benzene (3.6 mmol, 1 equiv.), K<sub>3</sub>PO<sub>4</sub> (14.4 mmol, 4 equiv.), *N*-heteroarene (10.8 mmol, 3 equiv.), CuI (0.36 mmol, 0.1 equiv.), 1,10-phen (0.648 mmol, 0.18 equiv.) and DMSO (10 mL) were added under nitrogen atmosphere. The reaction mixture was stirred in a pre-heated oil bath at 140 °C for 20 h. After that, the product was extracted with ethyl acetate (150 mL), washed with water (25 mL) and brine solution (25 mL). The organic extract was dried over anhydrous MgSO<sub>4</sub> and concentrated. The crude was purified by column chromatography using ethyl acetate/hexane as eluent.

### 4. Synthesis of benzofuro-indolo-pyridines

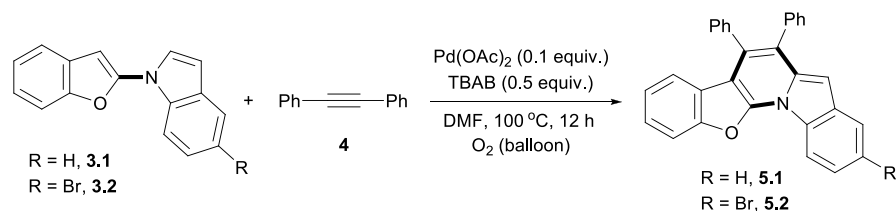

To an oven-dried Schlenk tube, 1-(2-benzofuryl)-*N*-heteroarene (0.171 mmol, 1 equiv.), 1,2-diphenylethyne (0.256 mmol, 1.5 equiv.), TBAB (0.085 mmol, 0.5 equiv.), Pd(OAc)<sub>2</sub> (0.017 mmol, 0.1 equiv.) and DMF (2 mL) were added under nitrogen atmosphere. The nitrogen gas present in the Schlenk tube was removed under vacuum and filled with oxygen gas using a oxygen balloon. The reaction mixture was stirred in a pre-heated oil bath at 100 °C for 12 h. After that, the product was extracted with ethyl acetate (20 mL), washed with water (5 mL) and brine solution (5 mL). The organic extract was dried over anhydrous MgSO<sub>4</sub> and concentrated. The crude was purified by column chromatography using ethyl acetate/hexane as eluent.

## 5. Characterization data

**(3.1):**<sup>2</sup> White solid (0.064 g, 73%); mp 64-66 °C. <sup>1</sup>H NMR (400 MHz, CDCl<sub>3</sub>)  $\delta$  = 7.88–7.86 (m, 1H), 7.71–7.69 (m, 1H), 7.59 (q,  $J$  = 3.2, 2.8 Hz, 2H), 7.54–7.52 (m, 1H), 7.39–7.34 (m, 1H), 7.31–7.26 (m, 3H), 6.75 (dd,  $J$  = 3.4, 0.8 Hz, 1H), 6.58 (d,  $J$  = 0.9 Hz, 1H) ppm. <sup>13</sup>C NMR (100 MHz, CDCl<sub>3</sub>)  $\delta$  = 151.28, 149.25, 135.02, 129.54, 128.82, 125.83, 123.50, 123.48, 123.45, 121.62, 121.31, 120.35, 111.77, 110.84, 105.88, 90.63 ppm. IR (film, cm<sup>-1</sup>): 3054, 1622, 1458, 1213, 739. HRMS (EI) m/z: [M]<sup>+</sup> Calcd for C<sub>16</sub>H<sub>11</sub>NO 233.0841; Found 233.0842.

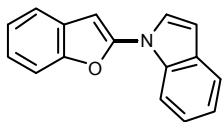

**(3.2):** White solid (0.084 g, 72%); mp 88-90 °C. <sup>1</sup>H NMR (400 MHz, CDCl<sub>3</sub>)  $\delta$  = 7.81 (d,  $J$  = 1.9 Hz, 1H), 7.72 (d,  $J$  = 8.8 Hz, 1H), 7.60–7.57 (m, 1H), 7.56 (d,  $J$  = 3.4 Hz, 1H), 7.53–7.51 (m, 1H), 7.42 (dd,  $J$  = 8.8, 1.9 Hz, 1H), 7.31–7.29 (m, 2H), 6.68–6.67 (m, 1H), 6.56 (s, 1H) ppm. <sup>13</sup>C NMR (125 MHz, CDCl<sub>3</sub>)  $\delta$  = 151.39, 148.71, 133.77, 131.19, 128.56, 127.04, 126.34, 123.86, 123.78, 123.63, 120.50, 114.84, 113.22, 110.91, 105.26, 91.24 ppm. IR (film, cm<sup>-1</sup>): 3126, 1621, 1457, 1211, 744. HRMS (EI) m/z: [M]<sup>+</sup> Calcd for C<sub>16</sub>H<sub>10</sub>BrNO 310.9946; Found 310.9940.

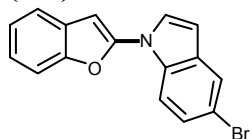

**(3.3):**<sup>2</sup> White solid (0.069 g, 79%); mp 115-117 °C. <sup>1</sup>H NMR (400 MHz, CDCl<sub>3</sub>)  $\delta$  = 8.39 (s, 1H), 7.90 (dd,  $J$  = 7.0, 1.3 Hz, 1H), 7.79 (d,  $J$  = 7.8 Hz, 1H), 7.65–7.63 (m, 1H), 7.57–7.55 (m, 1H), 7.47–7.31 (m, 4H), 6.74 (d,  $J$  = 0.8 Hz, 1H) ppm. <sup>13</sup>C NMR (125 MHz, CDCl<sub>3</sub>)  $\delta$  = 151.67, 145.79, 143.73, 140.70, 132.12, 127.99, 124.61, 124.55, 123.85, 123.69, 120.94, 120.85, 111.36, 111.12, 92.90 ppm. IR (film, cm<sup>-1</sup>): 3141, 1632, 1499, 1222, 1017, 743. HRMS (ESI) m/z: [M+H]<sup>+</sup> Calcd for C<sub>15</sub>H<sub>11</sub>N<sub>2</sub>O 235.0871; Found 235.0871.

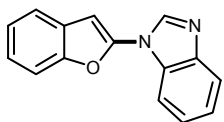

**(3.4):**<sup>2</sup> White solid (0.051 g, 74%); mp 57-59 °C. <sup>1</sup>H NMR (400 MHz, CDCl<sub>3</sub>)  $\delta$  = 8.05 (s, 1H), 7.57–7.55 (m, 1H), 7.50–7.48 (m, 1H), 7.41 (s, 1H), 7.34–7.28 (m, 2H), 7.22 (s, 1H), 6.52 (d,  $J$  = 0.8 Hz, 1H) ppm. <sup>13</sup>C NMR (100 MHz, CDCl<sub>3</sub>)  $\delta$  = 151.62, 146.48, 135.16, 130.54, 127.91, 124.45, 123.87, 120.89, 117.03, 111.10, 91.02 ppm. IR (film, cm<sup>-1</sup>): 3147, 1628, 1490, 1057, 789. HRMS (ESI) m/z: [M+H]<sup>+</sup> Calcd for C<sub>11</sub>H<sub>9</sub>N<sub>2</sub>O 185.0715; Found 185.0717.

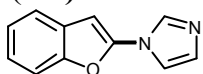

**(3.5):**<sup>2</sup> White solid (0.085 g, 62%); mp 88-90 °C. <sup>1</sup>H NMR (400 MHz, CDCl<sub>3</sub>)  $\delta$  = 7.55–7.52 (m, 1H), 7.50–7.48 (m, 1H), 7.28–7.26 (m, 4H), 6.40–6.39 (m, 2H), 6.37 (s, 1H) ppm. <sup>13</sup>C NMR (100 MHz, CDCl<sub>3</sub>)  $\delta$  = 151.30, 150.18, 128.88, 123.48, 123.22, 120.23, 118.78, 111.19, 110.79, 87.49 ppm. IR (film, cm<sup>-1</sup>): 3133, 1621, 1454, 1008, 724. HRMS (ESI) m/z: [M]<sup>+</sup> Calcd for C<sub>12</sub>H<sub>9</sub>NO 183.0684; Found 183.0685.

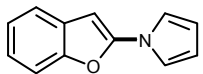

**(3.6):** Colourless solid (0.016 g, 17%); mp 85-87 °C. <sup>1</sup>H NMR (400 MHz, CDCl<sub>3</sub>)  $\delta$  = 7.77–7.74 (m, 1H), 7.70–7.67 (m, 1H), 7.56 (dd,  $J$  = 8.2, 0.9 Hz, 1H), 7.43–7.39 (m, 2H), 7.38–7.28 (m, 3H), 6.79 (d,  $J$  = 0.7 Hz, 1H), 2.68 (s, 3H) ppm. <sup>13</sup>C NMR (100 MHz, CDCl<sub>3</sub>)  $\delta$  = 152.60, 151.86, 144.61, 142.41, 135.50, 127.63, 125.23, 123.71, 123.49, 123.29, 121.35, 119.33, 111.45, 110.35, 100.06, 14.62 ppm. IR (film, cm<sup>-1</sup>): 3058, 1626, 1456, 1247, 743. HRMS (EI) m/z: [M+H]<sup>+</sup> Calcd for C<sub>16</sub>H<sub>12</sub>N<sub>2</sub>O 248.0950; Found 248.0952.

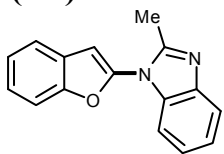

**(3.7):** White solid (0.045 g, 65%); mp 94-96 °C. <sup>1</sup>H NMR (400 MHz, CDCl<sub>3</sub>) δ = 8.71 (s, 1H), 8.15 (s, 1H), 7.63–7.60 (m, 1H), 7.53–7.51 (m, 1H), 7.37–7.29 (m, 2H), 6.85 (d, *J* = 0.9 Hz, 1H) ppm. <sup>13</sup>C NMR (100 MHz, CDCl<sub>3</sub>) δ = 153.13, 151.83, 145.87, 141.59, 127.63, 125.06, 124.11, 121.48, 111.23, 93.09 ppm. IR (film, cm<sup>-1</sup>): 3131, 1641, 1398, 1063, 742. HRMS (ESI) *m/z*: [M+H]<sup>+</sup> Calcd for C<sub>10</sub>H<sub>8</sub>N<sub>3</sub>O 186.0667; Found 186.0668.

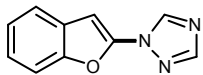

**(3.8):** White solid (0.067 g, 68%); mp 96-98 °C. <sup>1</sup>H NMR (400 MHz, CDCl<sub>3</sub>) δ = 7.83 (d, *J* = 8.2 Hz, 1H), 7.68 (d, *J* = 7.8 Hz, 1H), 7.62 (d, *J* = 3.5 Hz, 1H), 7.37–7.33 (m, 1H), 7.26–7.19 (m, 3H), 6.83 (dd, *J* = 7.1, 2.0 Hz, 1H), 6.73 (d, *J* = 3.0 Hz, 1H), 6.58 (s, 1H), 4.05 (s, 3H) ppm. <sup>13</sup>C NMR (125 MHz, CDCl<sub>3</sub>) δ = 149.14, 145.03, 140.39, 135.14, 130.48, 129.50, 126.05, 124.15, 123.46, 121.57, 121.26, 112.82, 111.69, 106.35, 105.75, 91.40, 56.15 ppm. IR (film, cm<sup>-1</sup>): 3034, 1618, 1456, 1213, 1094, 721. HRMS (ESI) *m/z*: [M+H]<sup>+</sup> Calcd for C<sub>17</sub>H<sub>14</sub>NO<sub>2</sub> 264.1025; Found 264.1021.

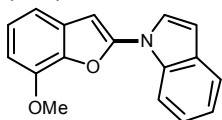

**(3.9):** White solid (0.052 g, 65%); mp 50-52 °C. <sup>1</sup>H NMR (400 MHz, CDCl<sub>3</sub>) δ = 7.26–7.24 (m, 2H), 7.17 (t, *J* = 7.8 Hz, 1H), 7.11 (dd, *J* = 7.8, 1.1 Hz, 1H), 6.79 (d, *J* = 7.8 Hz, 1H), 6.36 (t, *J* = 2.1 Hz, 2H), 6.34 (s, 1H), 4.03 (s, 3H) ppm. <sup>13</sup>C NMR (125 MHz, CDCl<sub>3</sub>) δ = 150.27, 144.95, 140.34, 130.57, 124.15, 119.00, 112.74, 111.11, 106.19, 88.20, 56.12 ppm. IR (film, cm<sup>-1</sup>): 3120, 2962, 1622, 1477, 1321, 716. HRMS (EI) *m/z*: [M]<sup>+</sup> Calcd for C<sub>13</sub>H<sub>11</sub>NO<sub>2</sub> 213.0790; Found 213.0797.

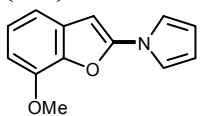

**(3.10):** White solid (0.065 g, 66%); mp 124-126 °C. <sup>1</sup>H NMR (400 MHz, CDCl<sub>3</sub>) δ = 8.42 (s, 1H), 7.90 (dd, *J* = 7.0, 1.5 Hz, 1H), 7.77 (dd, *J* = 7.3, 1.5 Hz, 1H), 7.46–7.38 (m, 2H), 7.28–7.22 (m, 2H), 6.89 (dd, *J* = 7.2, 1.9 Hz, 1H), 6.74 (s, 1H), 4.05 (s, 3H) ppm. <sup>13</sup>C NMR (125 MHz, CDCl<sub>3</sub>) δ = 145.68, 145.22, 143.57, 141.00, 140.86, 132.28, 129.64, 124.65, 124.60, 123.72, 120.81, 113.23, 111.34, 107.11, 93.87, 56.11 ppm. IR (film, cm<sup>-1</sup>): 2965, 1625, 1454, 1216, 726. HRMS (ESI) *m/z*: [M+H]<sup>+</sup> Calcd for C<sub>16</sub>H<sub>13</sub>N<sub>2</sub>O<sub>2</sub> 265.0977; Found 265.0972.

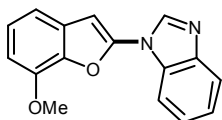

**(3.11):** White solid (0.07 g, 87%); mp 63-65 °C. <sup>1</sup>H NMR (400 MHz, CDCl<sub>3</sub>) δ = 8.09 (s, 1H), 7.46 (d, *J* = 1.4 Hz, 1H), 7.25–7.17 (m, 3H), 6.87 (d, *J* = 7.9 Hz, 1H), 6.56–6.55 (m, 1H), 4.05 (d, *J* = 1.6 Hz, 3H) ppm. <sup>13</sup>C NMR (125 MHz, CDCl<sub>3</sub>) δ = 146.45, 145.07, 140.83, 135.33, 130.38, 129.52, 124.55, 117.31, 113.12, 106.92, 91.90, 56.00 ppm. IR (film, cm<sup>-1</sup>): 3401, 2929, 1629, 1482, 1096, 727. HRMS (ESI) *m/z*: [M+H]<sup>+</sup> Calcd for C<sub>12</sub>H<sub>11</sub>N<sub>2</sub>O<sub>2</sub> 215.0821; Found 215.0829.

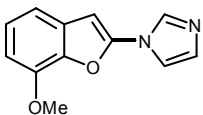

**(3.12):** White solid (0.07 g, 60%); mp 116-118 °C. <sup>1</sup>H NMR (400 MHz, CDCl<sub>3</sub>) δ = 8.15 (d, *J* = 8.2 Hz, 1H), 7.97 (d, *J* = 8.2 Hz, 1H), 7.82 (d, *J* = 9.0 Hz, 1H), 7.75–7.67 (m, 2H), 7.63–7.59 (m, 2H), 7.54–7.50 (m, 1H), 7.16 (d, *J* = 1.9 Hz, 1H), 7.03–6.99 (m, 2H), 6.69 (d, *J* = 3.3 Hz, 1H), 3.90 (d, *J* = 1.4 Hz, 3H) ppm. <sup>13</sup>C NMR (100 MHz, CDCl<sub>3</sub>) δ = 155.26, 148.79, 148.19, 148.17, 130.52, 130.12, 130.09, 128.82, 127.15, 126.41, 124.71, 124.09, 123.41, 113.14, 112.48, 111.72, 105.56, 103.15, 89.72, 89.67, 55.75 ppm. IR (film, cm<sup>-1</sup>): 2999, 1613, 1477, 1252, 986, 780. HRMS (EI) *m/z*: [M]<sup>+</sup> Calcd for C<sub>21</sub>H<sub>15</sub>NO<sub>2</sub> 313.1103; Found 313.1105.

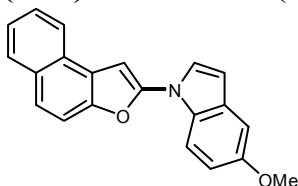

**(3.13):** White solid (0.071 g, 67%); mp 86-88 °C. <sup>1</sup>H NMR (400 MHz, CDCl<sub>3</sub>) δ = 8.42 (d, *J* = 8.6 Hz, 1H), 8.18–8.14 (m, 1H), 8.00–7.97 (m, 1H), 7.93 (d, *J* = 7.8 Hz, 1H), 7.84–7.78 (m, 2H), 7.72–7.62 (m, 2H), 7.57–7.53 (m, 1H), 7.48–7.40 (m, 2H), 7.22–7.18 (m, 1H) ppm. <sup>13</sup>C NMR (125 MHz, CDCl<sub>3</sub>) δ = 149.10, 144.99, 143.60, 140.90, 132.38, 130.61, 128.96, 127.31, 126.69, 125.62, 125.12, 124.66, 123.74, 123.41, 123.29, 120.86, 111.78, 111.32, 93.03 ppm. IR (film, cm<sup>-1</sup>): 3055, 1607, 1498, 1194, 987, 743. HRMS (ESI) m/z: [M+H]<sup>+</sup> Calcd for C<sub>19</sub>H<sub>13</sub>N<sub>2</sub>O 285.1028; Found 285.1026.

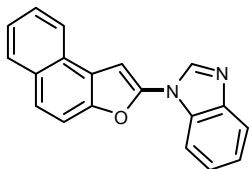

**(3.14):** White solid (0.061 g, 69%); mp 104-106 °C. <sup>1</sup>H NMR (400 MHz, CDCl<sub>3</sub>) δ = 8.08 (d, *J* = 10.1 Hz, 2H), 7.95 (d, *J* = 8.1 Hz, 1H), 7.75 (d, *J* = 8.9 Hz, 1H), 7.64-7.59 (m, 2H), 7.52 (t, *J* = 7.6 Hz, 1H), 7.46 (s, 1H), 7.26 (s, 1H), 6.97 (s, 1H) ppm. <sup>13</sup>C NMR (100 MHz, CDCl<sub>3</sub>) δ = 148.84, 145.78, 135.26, 130.57, 130.48, 128.88, 127.23, 126.59, 125.41, 125.06, 123.33, 123.21, 117.27, 111.69, 90.88 ppm. IR (film, cm<sup>-1</sup>): 3118, 1622, 1485, 1056, 802. HRMS (ESI) m/z: [M+H]<sup>+</sup> Calcd for C<sub>15</sub>H<sub>11</sub>N<sub>2</sub>O 235.0871; Found 235.0877.

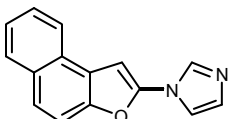

**(3.15):** White solid (0.08 g, 70%); mp 110-112 °C. <sup>1</sup>H NMR (400 MHz, CDCl<sub>3</sub>) δ = 8.19 (d, *J* = 1.7 Hz, 1H), 7.93 (dd, *J* = 8.6, 1.8 Hz, 1H), 7.75 (d, *J* = 8.9 Hz, 1H), 7.56–7.53 (m, 2H), 7.14 (d, *J* = 2.5 Hz, 1H), 7.00 (dd, *J* = 9.0, 2.5 Hz, 1H), 6.68 (d, *J* = 3.2 Hz, 1H), 6.56 (s, 1H), 3.89 (s, 3H), 2.68 (s, 3H) ppm. <sup>13</sup>C NMR (100 MHz, CDCl<sub>3</sub>) δ = 197.62, 155.44, 153.70, 150.68, 133.30, 130.41, 129.70, 129.16, 125.92, 124.12, 121.15, 113.29, 112.56, 110.67, 106.29, 103.36, 89.39, 55.74, 26.81 ppm. IR (film, cm<sup>-1</sup>): 3132, 2928, 1625, 1479, 1267, 796. HRMS (ESI) m/z: [M+H]<sup>+</sup> Calcd for C<sub>19</sub>H<sub>16</sub>NO<sub>3</sub> 306.1130; Found 306.1134.

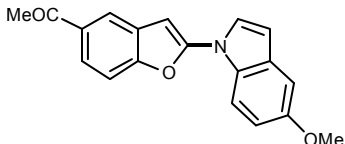

**(3.16):** White solid (0.078 g, 75%); mp 180-182 °C. <sup>1</sup>H NMR (400 MHz, CDCl<sub>3</sub>) δ = 8.40 (s, 1H), 8.27 (d, *J* = 1.6 Hz, 1H), 8.01 (dd, *J* = 8.7, 1.8 Hz, 1H), 7.90 (dd, *J* = 7.2, 1.4 Hz, 1H), 7.77 (dd, *J* = 7.3, 1.2 Hz, 1H), 7.60 (d, *J* = 8.7 Hz, 1H), 7.47–7.39 (m, 2H), 6.80 (d, *J* = 0.7 Hz, 1H), 2.69 (s, 3H) ppm. <sup>13</sup>C NMR (100 MHz, CDCl<sub>3</sub>) δ = 197.30, 154.08, 147.08, 143.67, 140.41, 133.63, 131.78, 128.25, 125.28, 124.87, 123.98, 121.96, 120.99, 111.32, 111.15, 92.82, 26.81 ppm. IR (film, cm<sup>-1</sup>): 3146, 1679, 1631, 1497, 1300, 1195, 732. HRMS (ESI) m/z: [M+H]<sup>+</sup> Calcd for C<sub>17</sub>H<sub>13</sub>N<sub>2</sub>O<sub>2</sub> 277.0977; Found 277.0971.

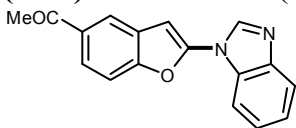

**(3.17):** White solid (0.074 g, 87%); mp 122-124 °C. <sup>1</sup>H NMR (400 MHz, CDCl<sub>3</sub>) δ = 8.15 (d, *J* = 45.4 Hz, 2H), 7.97 (d, *J* = 8.4 Hz, 1H), 7.54 (d, *J* = 8.5 Hz, 1H), 7.43 (s, 1H), 7.24 (s, 1H), 6.61 (s, 1H), 2.67 (s, 3H) ppm. <sup>13</sup>C NMR (100 MHz, CDCl<sub>3</sub>) δ = 197.24, 154.12, 147.70, 135.12, 133.72, 130.78, 128.19, 125.24, 121.93, 116.98, 111.16, 91.28, 26.76 ppm. IR (film, cm<sup>-1</sup>): 3123, 1680, 1633, 1267, 813, 649. HRMS (ESI) m/z: [M+H]<sup>+</sup> Calcd for C<sub>13</sub>H<sub>11</sub>N<sub>2</sub>O<sub>2</sub> 227.0821; Found 227.0821.

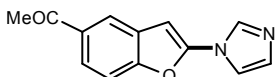

**(3.18):** White solid (0.052 g, 61%); mp 114-116 °C. <sup>1</sup>H NMR (400 MHz, CDCl<sub>3</sub>) δ = 8.14 (d, *J* = 1.8 Hz, 1H), 7.90 (dd, *J* = 8.5, 1.9 Hz, 1H), 7.49 (d, *J* = 8.6 Hz, 1H), 7.23 (t, *J* = 2.2 Hz, 2H), 6.38 (t, *J* = 2.0 Hz, 3H), 2.66 (s, 3H) ppm. <sup>13</sup>C NMR (100 MHz, CDCl<sub>3</sub>) δ = 197.55, 153.85, 151.31, 133.35, 129.13, 124.11, 121.18, 118.72, 111.66, 110.72, 87.48, 26.77 ppm. IR (film, cm<sup>-1</sup>): 3117, 1670, 1632, 1488, 1070, 787. HRMS (EI) m/z: [M]<sup>+</sup> Calcd for C<sub>14</sub>H<sub>11</sub>NO<sub>2</sub> 225.0790; Found 225.0793.

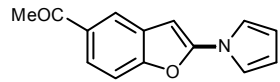

**(3.19):** White solid (0.079 g, 50%); mp 148-150 °C. <sup>1</sup>H NMR (400 MHz, CDCl<sub>3</sub>) δ = 7.78 (d, *J* = 9.0 Hz, 1H), 7.58 (d, *J* = 1.8 Hz, 1H), 7.54 (d, *J* = 3.5 Hz, 1H), 7.52 (d, *J* = 1.8 Hz, 1H), 7.12 (d, *J* = 2.5 Hz, 1H), 7.00 (dd, *J* = 9.0, 2.5 Hz, 1H), 6.68 (dd, *J* = 3.5, 0.7 Hz, 1H), 6.45 (s, 1H), 3.88 (s, 3H) ppm. <sup>13</sup>C NMR (100 MHz, CDCl<sub>3</sub>) δ = 155.60, 151.13, 147.35, 131.60, 130.55, 129.60, 128.21, 125.71, 121.80, 116.74, 113.45, 112.81, 106.86, 104.06, 103.54, 88.43, 55.76 ppm. IR (film, cm<sup>-1</sup>): 3004, 1611, 1477, 1146, 710. HRMS (EI) m/z: [M]<sup>+</sup> Calcd for C<sub>17</sub>H<sub>11</sub>Br<sub>2</sub>NO<sub>2</sub> 418.9157; Found 418.9157.

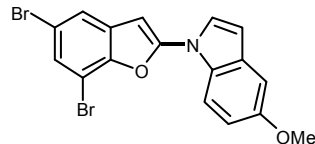

**(3.20):** White solid (0.106 g, 72%); mp 182-184 °C. <sup>1</sup>H NMR (400 MHz, CDCl<sub>3</sub>) δ = 8.41 (s, 1H), 7.90 (dd, *J* = 7.2, 1.3 Hz, 1H), 7.80 (dd, *J* = 7.7, 1.5 Hz, 1H), 7.69 (d, *J* = 1.8 Hz, 1H), 7.63 (d, *J* = 1.8 Hz, 1H), 7.49–7.40 (m, 2H), 6.72 (s, 1H) ppm. <sup>13</sup>C NMR (125 MHz, CDCl<sub>3</sub>) δ = 147.98, 147.55, 143.73, 140.27, 131.75, 130.59, 129.82, 125.10, 124.17, 122.69, 121.09, 117.24, 111.48, 104.61, 92.13 ppm. IR (film, cm<sup>-1</sup>): 3066, 1604, 1206, 840, 740. HRMS (ESI) m/z: [M+H]<sup>+</sup> Calcd for C<sub>15</sub>H<sub>9</sub>Br<sub>2</sub>N<sub>2</sub>O 390.9082; Found 390.9084.

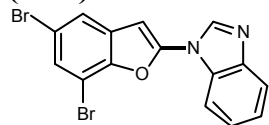

**(3.21):** White solid (0.098 g, 86%); mp 164-166 °C. <sup>1</sup>H NMR (400 MHz, CDCl<sub>3</sub>) δ = 8.41 (s, 1H), 7.90 (d, *J* = 8.4 Hz, 1H), 7.79 (d, *J* = 7.5 Hz, 1H), 7.49 (d, *J* = 2.0 Hz, 1H), 7.48–7.40 (m, 2H), 7.34 (d, *J* = 1.9 Hz, 1H), 6.70 (s, 1H) ppm. <sup>13</sup>C NMR (125 MHz, CDCl<sub>3</sub>) δ = 147.74, 146.13, 143.71, 140.27, 131.73, 130.35, 129.92, 125.07, 124.71, 124.16, 121.08, 119.15, 117.35, 111.43, 92.28 ppm. IR (film, cm<sup>-1</sup>): 3066, 1610, 1498, 1204, 739. HRMS (ESI) m/z: [M+H]<sup>+</sup> Calcd for C<sub>15</sub>H<sub>9</sub>Cl<sub>2</sub>N<sub>2</sub>O 303.0092; Found 303.0096.

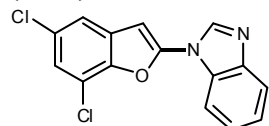

**(3.22):** White solid (0.096 g, 77%); mp 132-134 °C. <sup>1</sup>H NMR (400 MHz, CDCl<sub>3</sub>) δ = 7.76 (d, *J* = 9.0 Hz, 1H), 7.55 (d, *J* = 3.5 Hz, 1H), 7.39 (d, *J* = 1.9 Hz, 1H), 7.24 (d, *J* = 1.9 Hz, 1H), 7.12 (d, *J* = 2.5 Hz, 1H), 7.00 (dd, *J* = 9.0, 2.5 Hz, 1H), 6.68 (dd, *J* = 3.5, 0.6 Hz, 1H), 6.43 (d, *J* = 0.6 Hz, 1H), 3.88 (s, 3H) ppm. <sup>13</sup>C NMR (125 MHz, CDCl<sub>3</sub>) δ = 155.64, 151.34, 145.52, 131.36, 130.56, 129.65, 129.38, 125.74, 123.17, 118.30, 116.74, 113.44, 112.74, 106.81, 103.58, 88.63, 55.77 ppm. IR (film, cm<sup>-1</sup>): 2831, 1626, 1479, 1156, 978, 704. HRMS (EI) m/z: [M]<sup>+</sup> Calcd for C<sub>17</sub>H<sub>11</sub>Cl<sub>2</sub>NO<sub>2</sub> 331.0167; Found 331.0169.

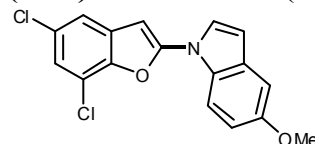

**(3.23):** White solid (0.05 g, 53%); mp 66-68 °C. <sup>1</sup>H NMR (400 MHz, CDCl<sub>3</sub>) δ = 7.36–7.35 (m, 1H), 7.24–7.22 (m, 3H), 6.39–6.38 (m, 2H), 6.30 (d, *J* = 1.5 Hz, 1H) ppm. <sup>13</sup>C NMR (125 MHz, CDCl<sub>3</sub>) δ = 151.79, 145.70, 131.32, 129.40, 123.35, 118.83, 118.43, 116.82, 111.95, 87.34 ppm. IR (film, cm<sup>-1</sup>): 3130, 1627, 1483, 1062, 955, 727. HRMS (EI) m/z: [M]<sup>+</sup> Calcd for C<sub>12</sub>H<sub>7</sub>Cl<sub>2</sub>NO 250.9905; Found 250.9902.

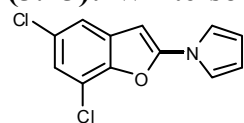

**(5.1):** Yellowish green solid (0.048 g, 69%); mp 130-132 °C. <sup>1</sup>H NMR (400 MHz, CDCl<sub>3</sub>) δ = 8.74–8.70 (m, 1H), 7.79–7.75 (m, 1H), 7.70 (dt, *J* = 8.2, 0.8 Hz, 1H), 7.47–7.42 (m, 2H), 7.36–7.26 (m, 11H), 7.13 (td, *J* = 7.6, 1.0 Hz, 1H), 6.86 (ddd, *J* = 7.9, 1.3, 0.5 Hz, 1H), 6.59 (s, 1H) ppm. <sup>13</sup>C NMR (100 MHz, CDCl<sub>3</sub>) δ = 152.31, 148.37, 138.31, 137.08, 136.93, 130.82, 130.60, 130.26, 129.68, 128.56, 128.05, 127.99, 127.41, 127.11, 125.17, 124.87, 123.77, 123.37, 123.30, 120.88, 120.28, 120.23, 114.36, 111.33, 100.93, 95.98 ppm. IR (film, cm<sup>-1</sup>): 3058, 1626, 1514, 1235, 1188, 734. HRMS (ESI) *m/z*: [M+H]<sup>+</sup> Calcd for C<sub>30</sub>H<sub>20</sub>NO 410.1545; Found 410.1541.

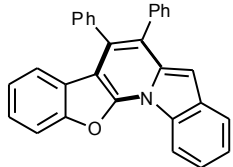

**(5.2):** Yellowish green solid (0.04 g, 48%); mp 224-226 °C. <sup>1</sup>H NMR (400 MHz, CDCl<sub>3</sub>) δ = 8.55 (d, *J* = 8.8 Hz, 1H), 7.88 (d, *J* = 1.7 Hz, 1H), 7.69 (d, *J* = 8.2 Hz, 1H), 7.49 (dd, *J* = 8.8, 1.9 Hz, 1H), 7.34–7.28 (m, 11H), 7.13 (t, *J* = 7.9 Hz, 1H), 6.85 (d, *J* = 8.1 Hz, 1H), 6.50 (s, 1H) ppm. <sup>13</sup>C NMR (100 MHz, CDCl<sub>3</sub>) δ = 152.37, 147.97, 139.15, 136.83, 136.59, 131.50, 131.20, 130.76, 130.16, 128.13, 128.06, 127.57, 127.27, 127.06, 125.14, 124.66, 123.94, 123.75, 123.62, 122.61, 120.39, 116.97, 115.71, 111.39, 101.51, 95.33 ppm. IR (film, cm<sup>-1</sup>): 3058, 1628, 1513, 1234, 1179, 698. HRMS (ESI) *m/z*: [M+H]<sup>+</sup> Calcd for C<sub>30</sub>H<sub>19</sub>BrNO 488.0650; Found 488.0659.

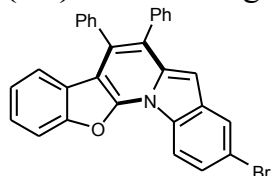

## 6. Crystallographic data

### Crystal structure determination and refinement

Single crystal of **5.1** coated with light hydrocarbon oil was mounted in the 100 K dinitrogen stream of a Bruker SMART APEX CCD diffractometer equipped with CRYO Industries low-temperature apparatus and intensity data were collected using graphite-monochromated Mo-K $\alpha$  radiation. The data integration and reduction were processed using the SAINT software. An absorption correction was applied. Structures were solved by direct methods using SHELXS-97 and refined on  $F^2$  by a full-matrix least-squares technique using the SHELXL-97 program package. Non-hydrogen atoms were refined anisotropically. In the refinement, hydrogen atoms were treated as riding atoms using the SHELXL default parameters. The crystal structure refinement parameters are listed in Table 1. All these software packages were a part of the WINGX software package. The X-ray crystallography data have been deposited in Cambridge Crystallography Data Center (CCDC 2040195).



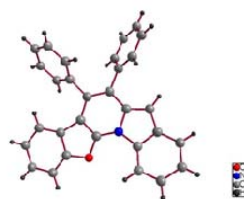

crystal structure of **5.1** (CCDC 2040195)

**Sample preparation for crystal growth:** The compound **5.1** was dissolved in ethyl acetate solvent. After that, the rectangular-like yellow crystals were grown by slow evaporation of solution **5.1**.

The ellipsoid contour % probability level in the caption for the image of the structure **5.1** is 50%.

**Table-1** for compound **5.1**.

Crystal data and structure refinement for 5sepe\_0m.

|                        |                                     |                              |
|------------------------|-------------------------------------|------------------------------|
| Identification code    | shelx                               |                              |
| Empirical formula      | C <sub>30</sub> H <sub>19</sub> N O |                              |
| Formula weight         | 409.46                              |                              |
| Temperature            | 293(2) K                            |                              |
| Wavelength             | 0.71073 Å                           |                              |
| Crystal system         | Triclinic                           |                              |
| Space group            | P -1                                |                              |
| Unit cell dimensions   | a = 7.4594(4) Å                     | $\alpha = 72.9290(10)^\circ$ |
|                        | b = 11.1120(5) Å                    | $\beta = 85.1410(10)^\circ$  |
|                        | c = 12.7546(6) Å                    | $\gamma = 80.7110(10)^\circ$ |
| Volume                 | 996.60(8) Å <sup>3</sup>            |                              |
| Z                      | 2                                   |                              |
| Density (calculated)   | 1.364 Mg/m <sup>3</sup>             |                              |
| Absorption coefficient | 0.082 mm <sup>-1</sup>              |                              |

|                                   |                                             |
|-----------------------------------|---------------------------------------------|
| F(000)                            | 428                                         |
| Crystal size                      | 0.220 x 0.200 x 0.180 mm <sup>3</sup>       |
| Theta range for data collection   | 4.082 to 25.027°.                           |
| Index ranges                      | -8<=h<=8, -13<=k<=13, -15<=l<=15            |
| Reflections collected             | 12034                                       |
| Independent reflections           | 3498 [R(int) = 0.0460]                      |
| Completeness to theta = 25.027°   | 99.4 %                                      |
| Absorption correction             | Psi-scan                                    |
| Max. and min. transmission        | 0.7212 and 0.6745                           |
| Refinement method                 | Full-matrix least-squares on F <sup>2</sup> |
| Data / restraints / parameters    | 3498 / 0 / 289                              |
| Goodness-of-fit on F <sup>2</sup> | 1.065                                       |
| Final R indices [I>2sigma(I)]     | R1 = 0.0430, wR2 = 0.1030                   |
| R indices (all data)              | R1 = 0.0550, wR2 = 0.1087                   |
| Extinction coefficient            | n/a                                         |
| Largest diff. peak and hole       | 0.249 and -0.388 e.Å <sup>-3</sup>          |

## 7. References

- 1 S. G. Newman, A. Aureggi, C. S. Bryan and M. Lautens, *Chem. Commun.*, 2009, 5236.
- 2 M. Hedidi, G. Bentabed-Ababsa, A. Derdour, T. Roisnel, V. Dorcet, F. Chevallier, L. Picot, V. Thiéry and F. Mongin, *Bioorg. Med. Chem.*, 2014, **22**, 3498.
- 3 M. Li, J.-H. Wang, W. Li, C.-D. Lin, L.-B. Zhang and L.-R. Wen, *J. Org. Chem.*, 2019, **84**, 8523.

8.  $^1\text{H}$  NMR, and  $^{13}\text{C}$  NMR spectra:

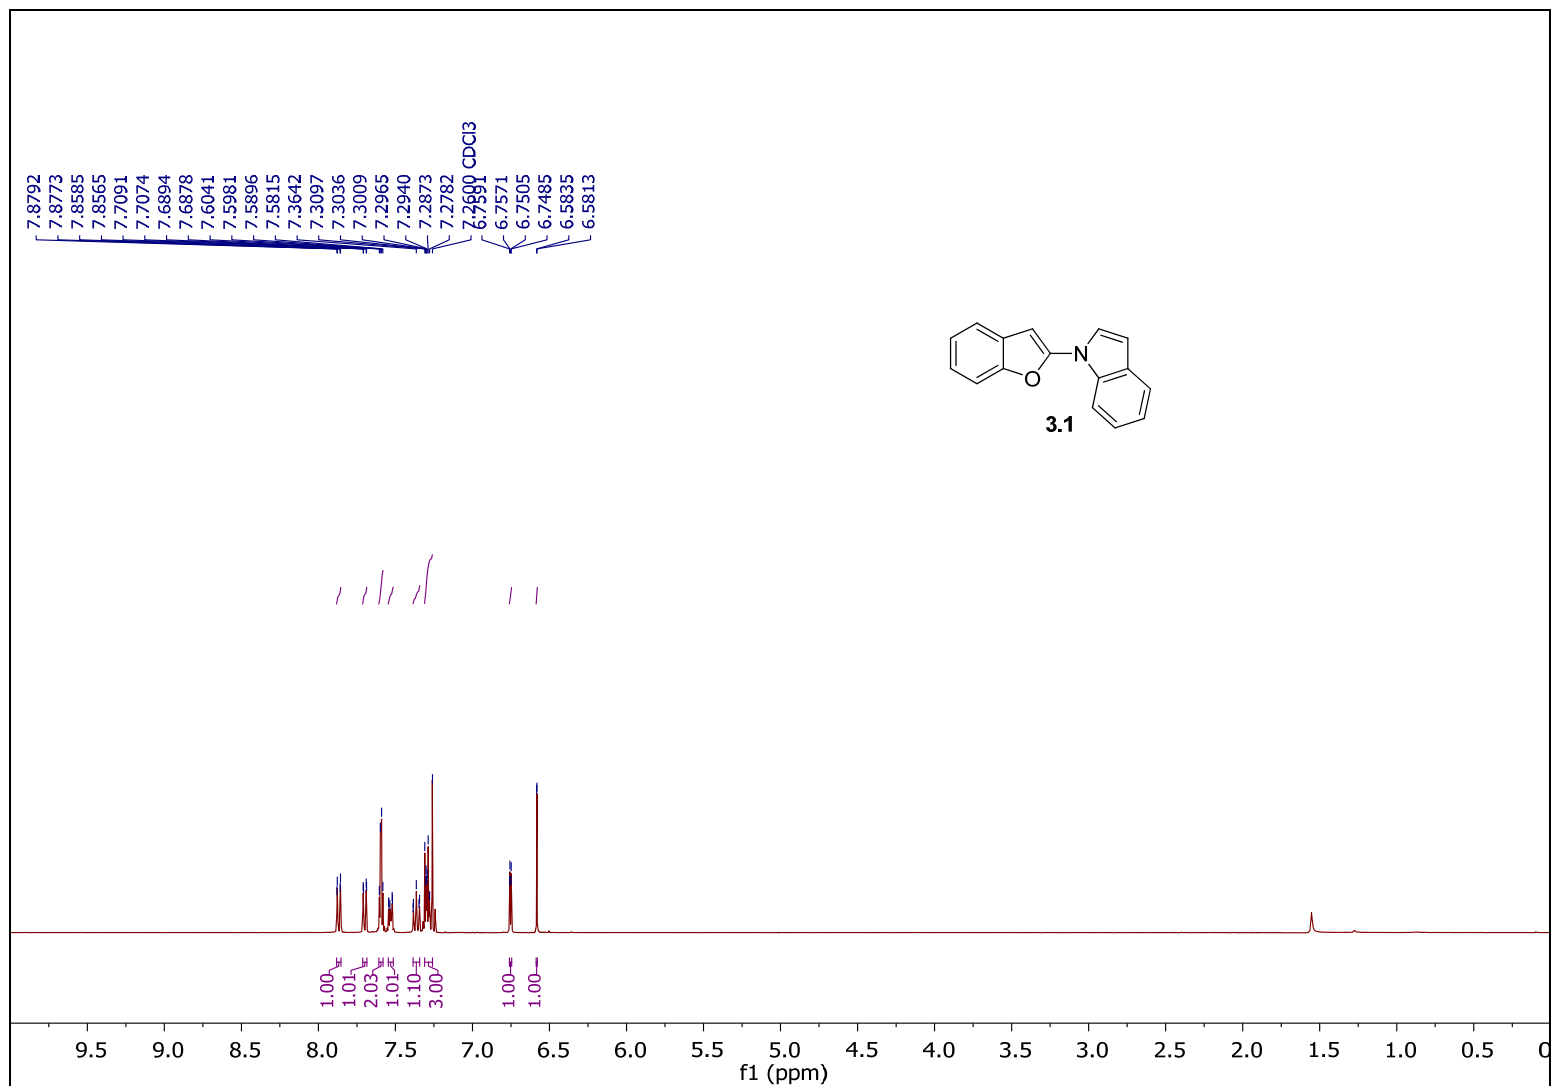

$^1\text{H}$  NMR (400 MHz,  $\text{CDCl}_3$ ) spectrum of **3.1**

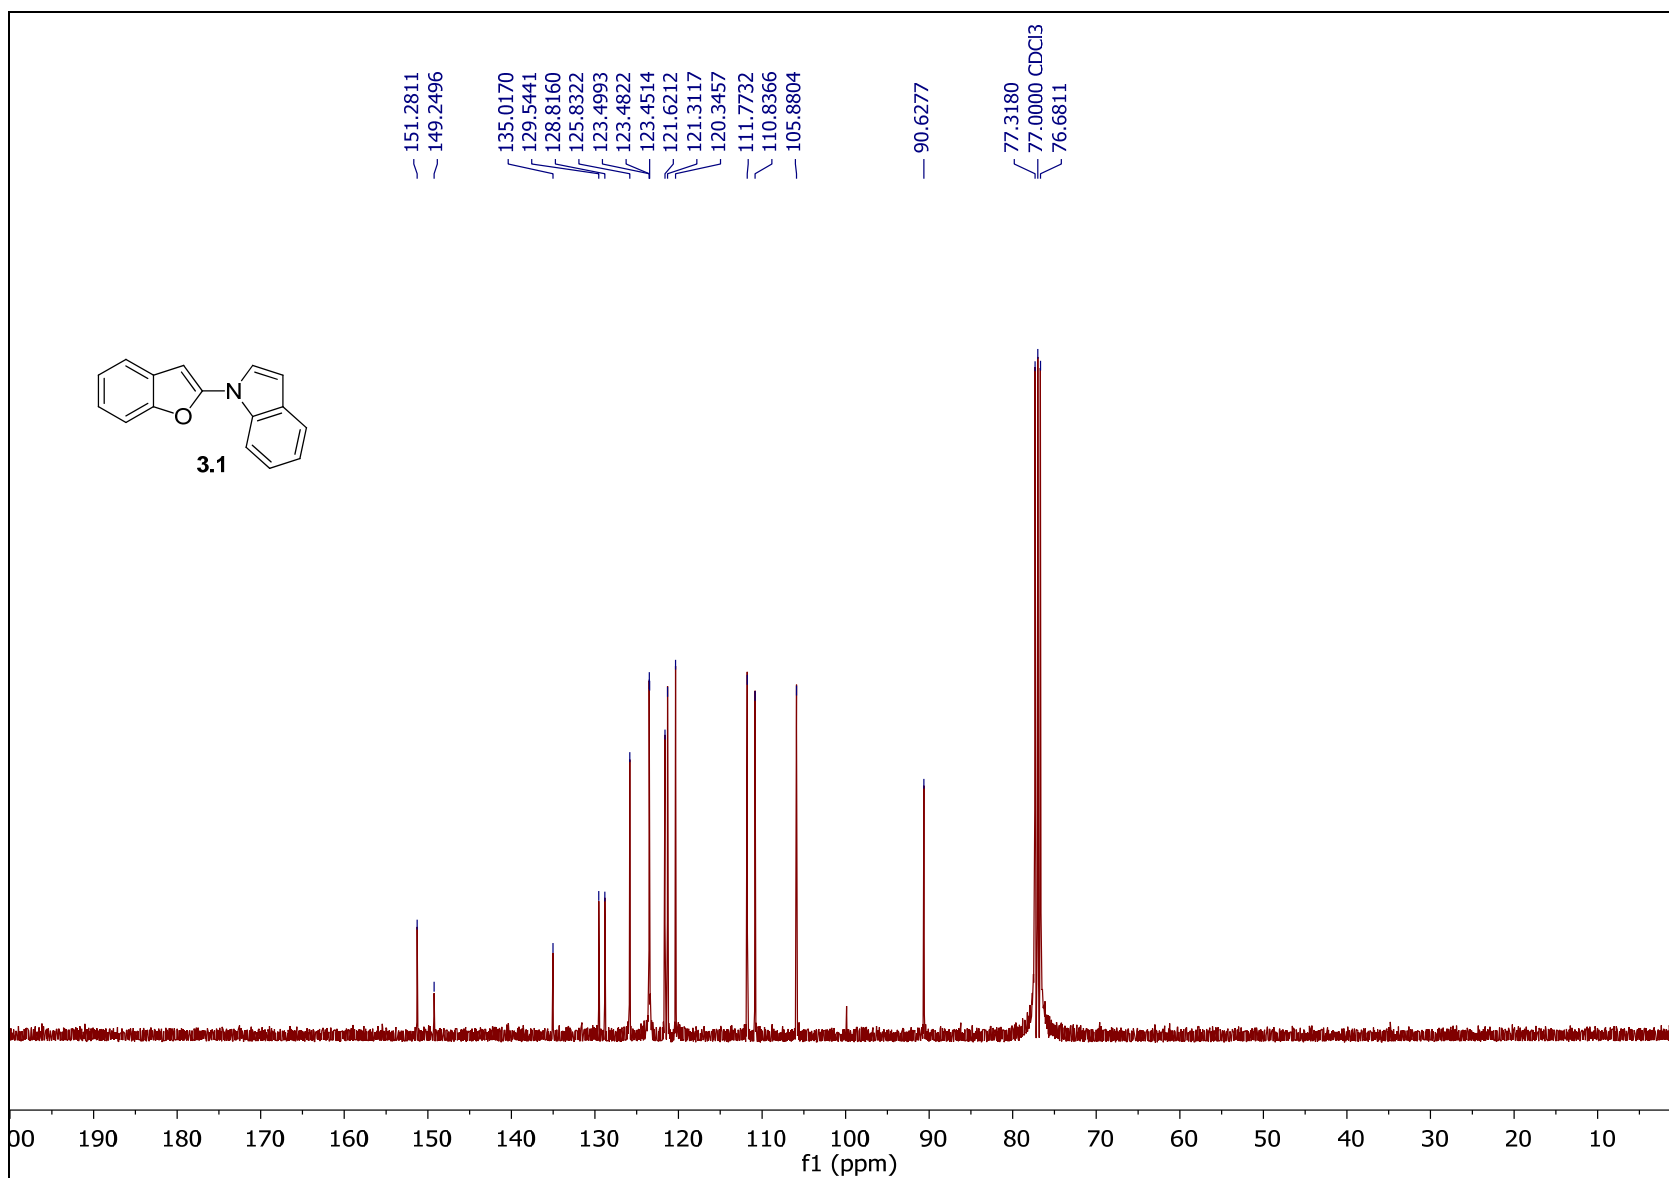

<sup>13</sup>C NMR (100 MHz, CDCl<sub>3</sub>) spectrum of **3.1**

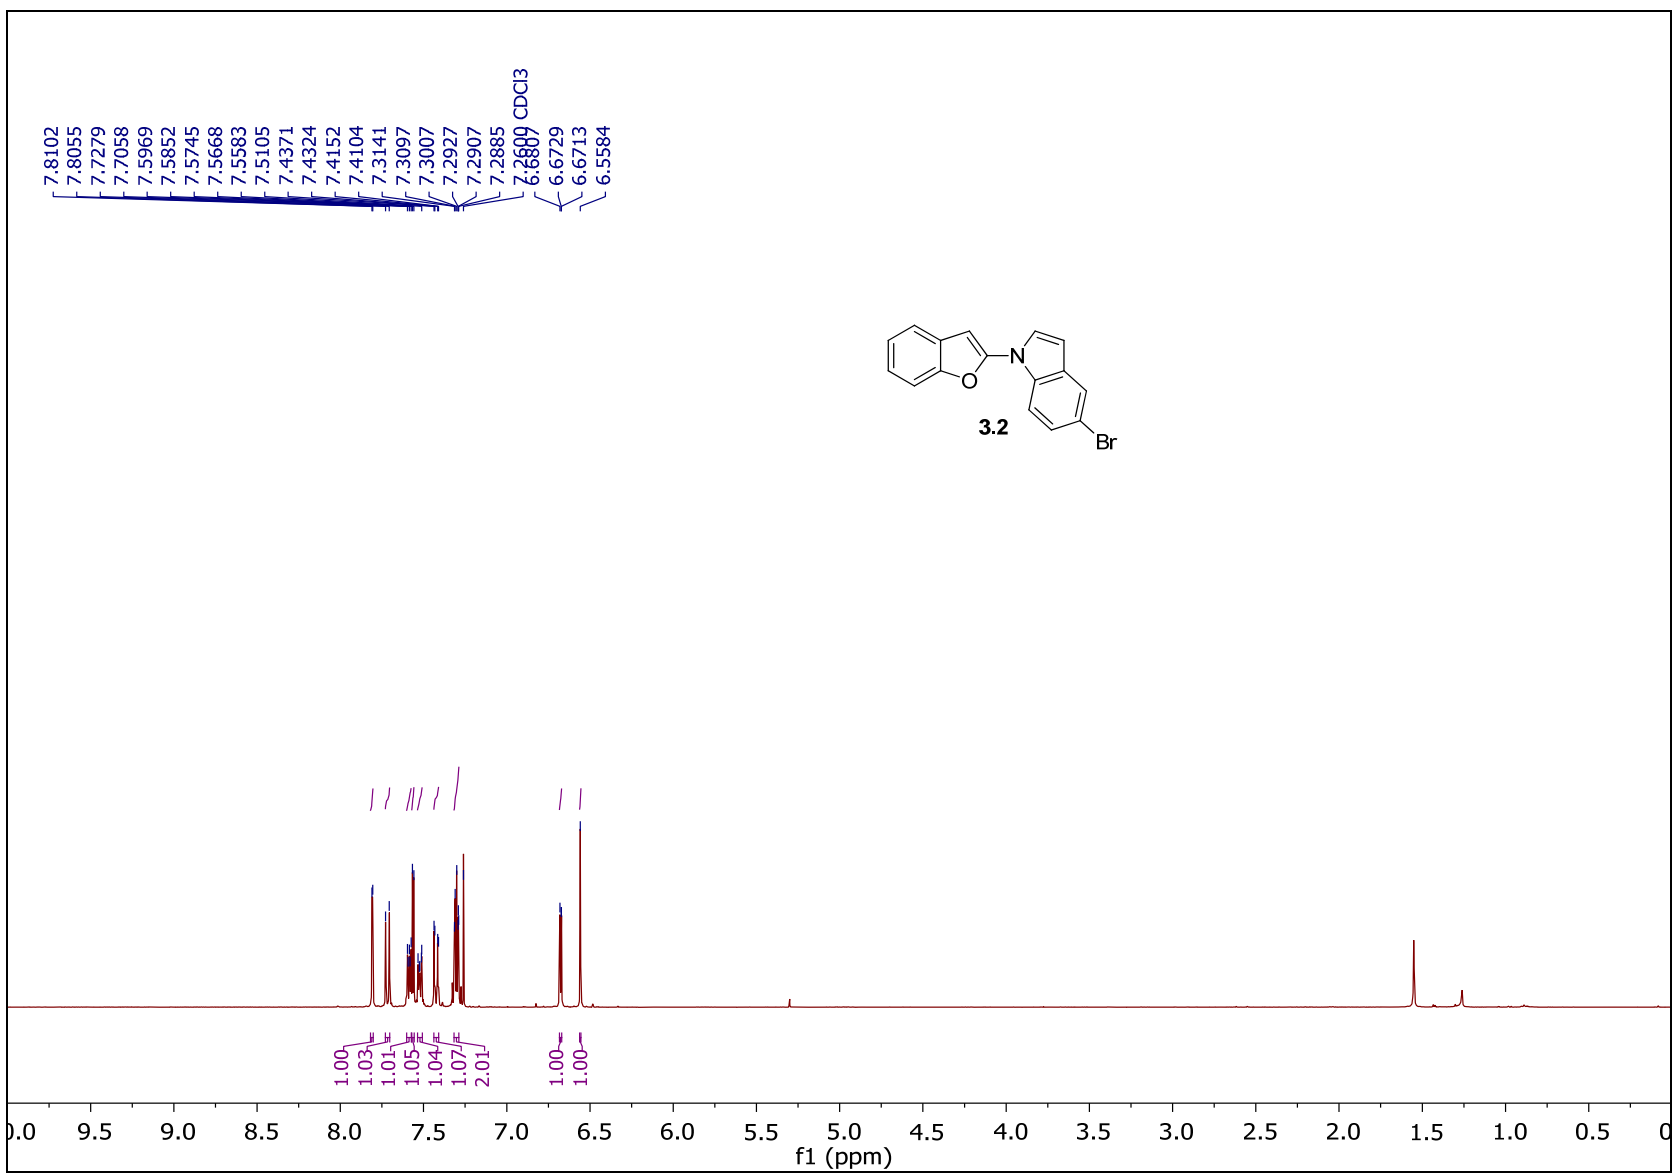

<sup>1</sup>H NMR (400 MHz, CDCl<sub>3</sub>) spectrum of **3.2**

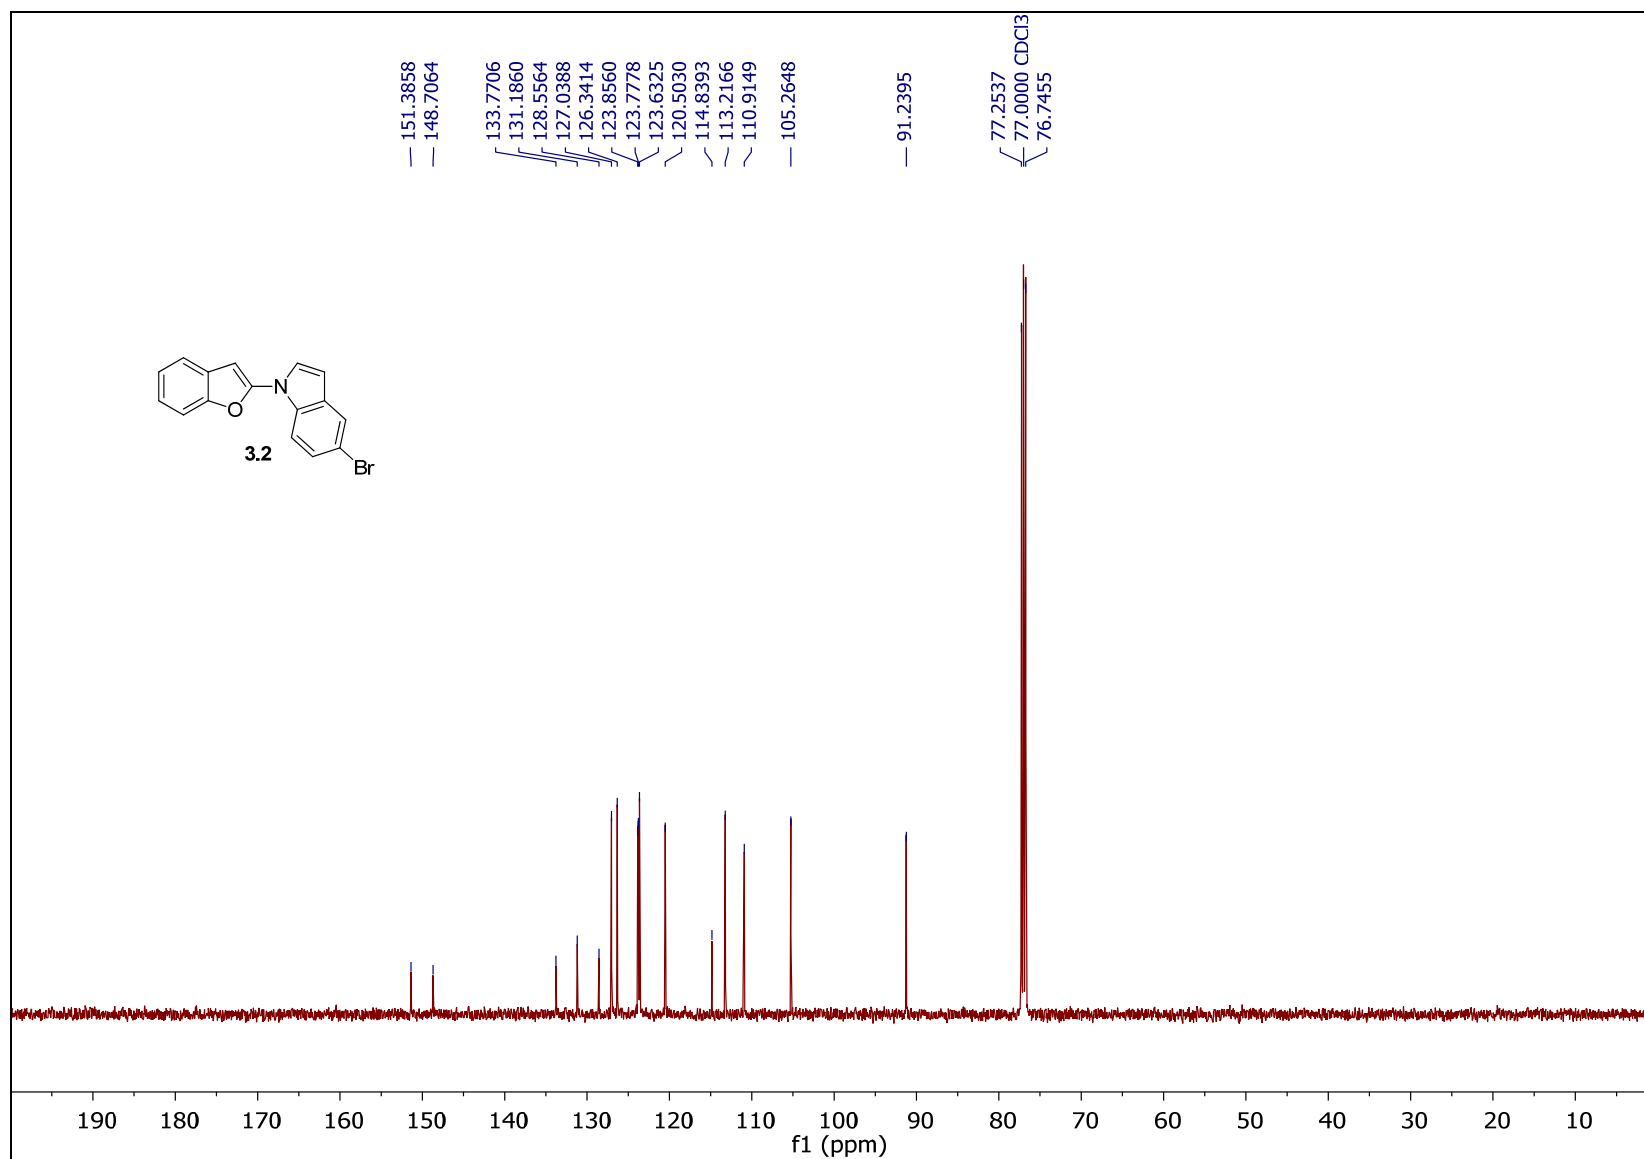

<sup>13</sup>C NMR (125 MHz, CDCl<sub>3</sub>) spectrum of **3.2**

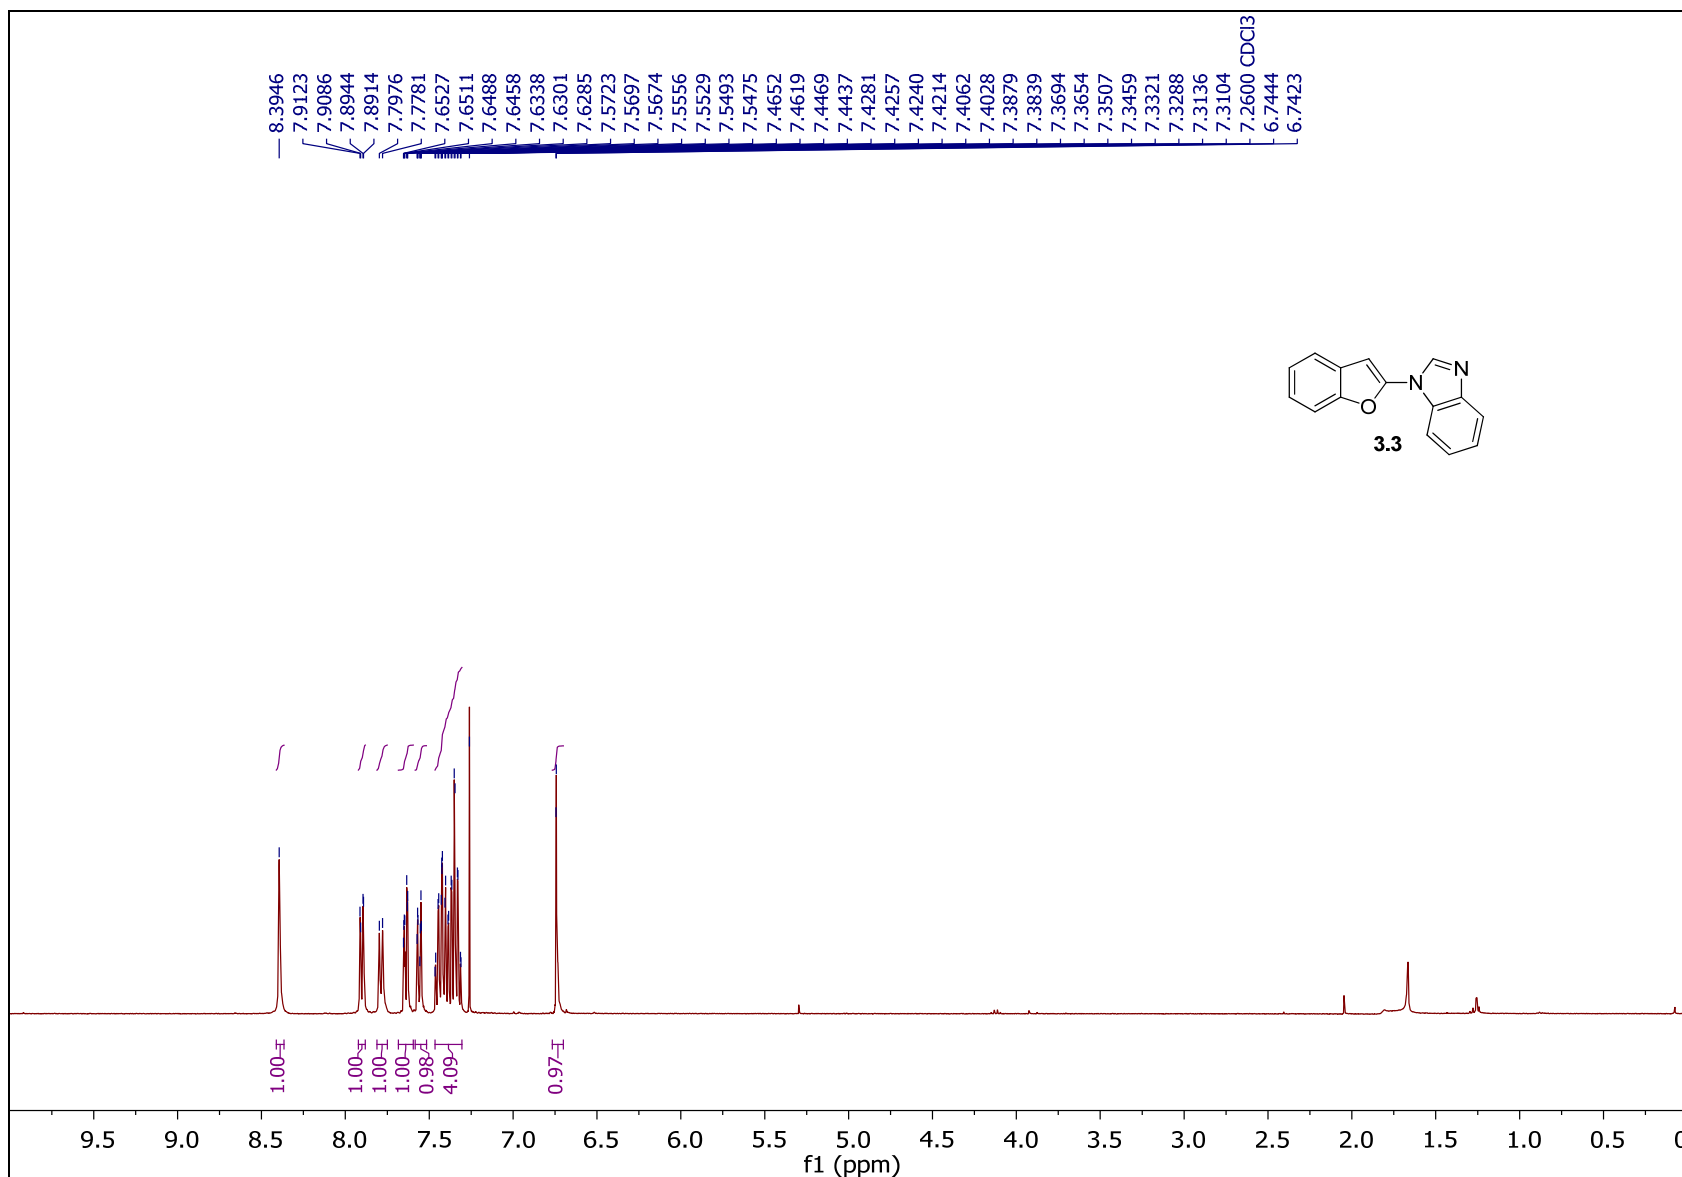

<sup>1</sup>H NMR (400 MHz, CDCl<sub>3</sub>) spectrum of **3.3**

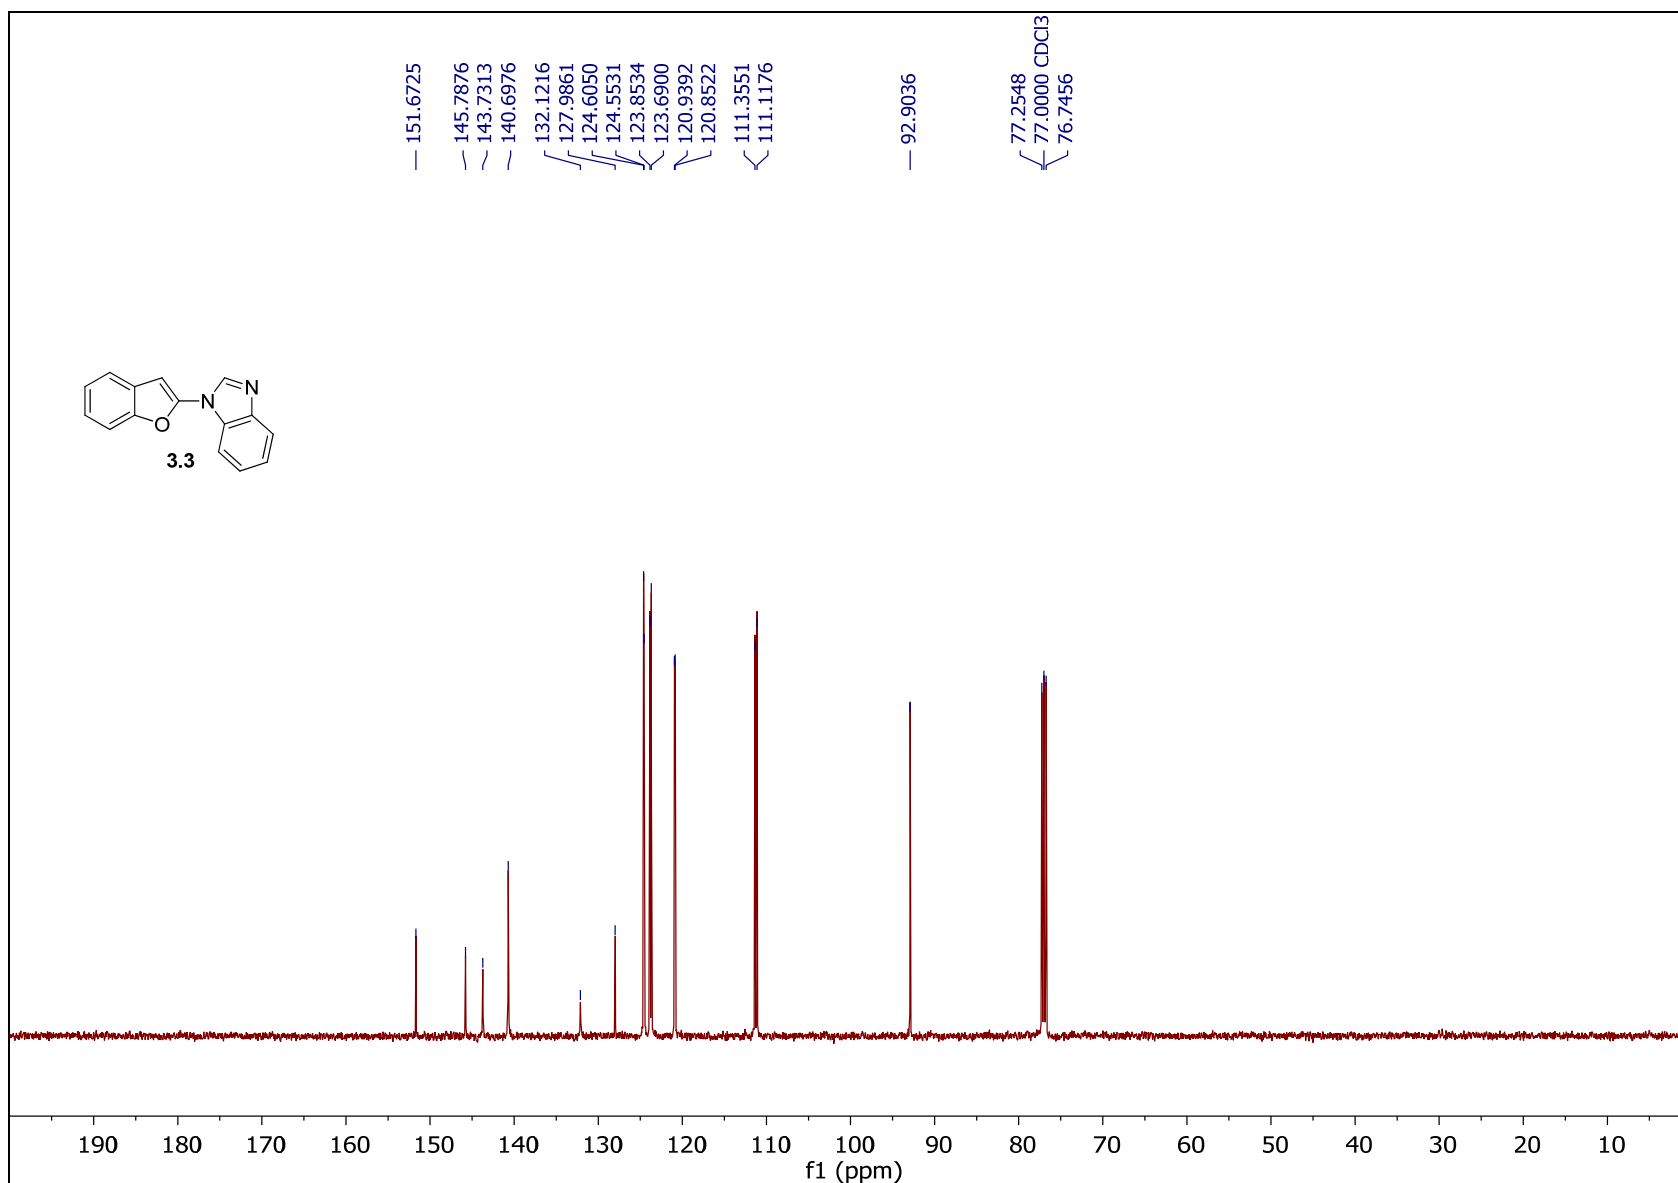

<sup>13</sup>C NMR (125 MHz, CDCl<sub>3</sub>) spectrum of **3.3**



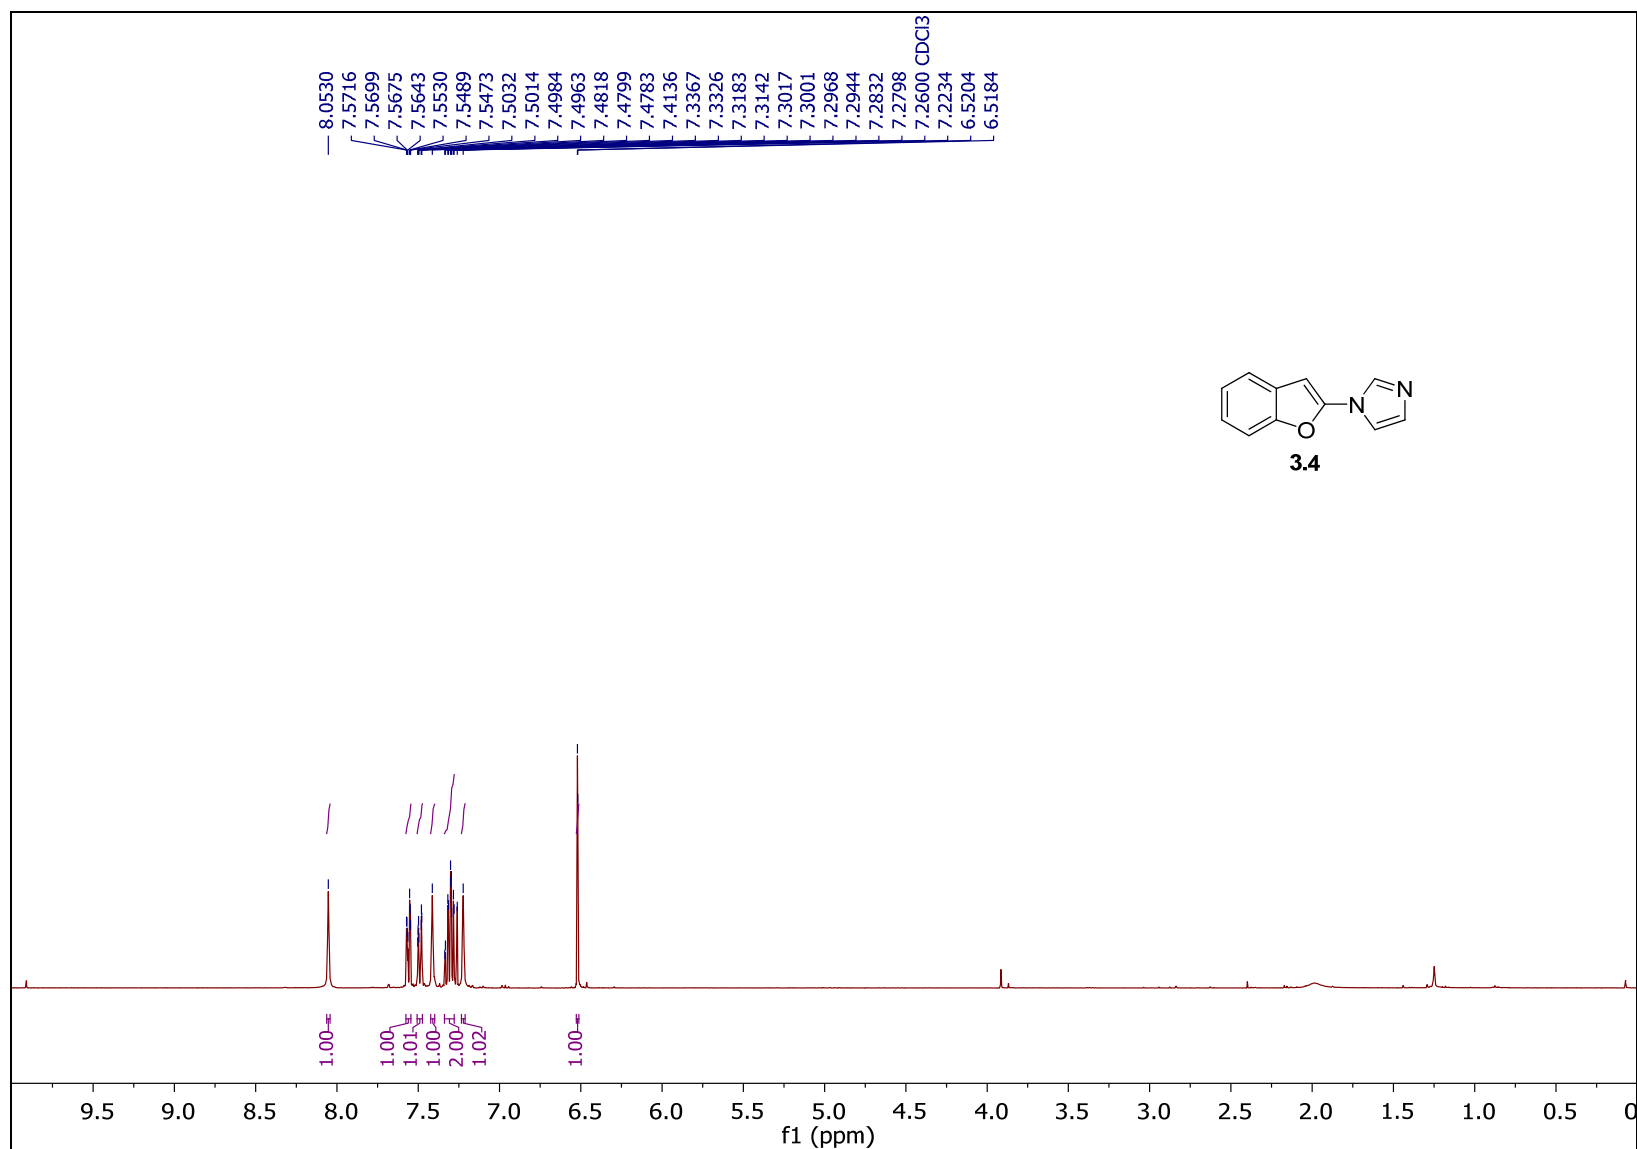

<sup>1</sup>H NMR (400 MHz, CDCl<sub>3</sub>) spectrum of **3.4**

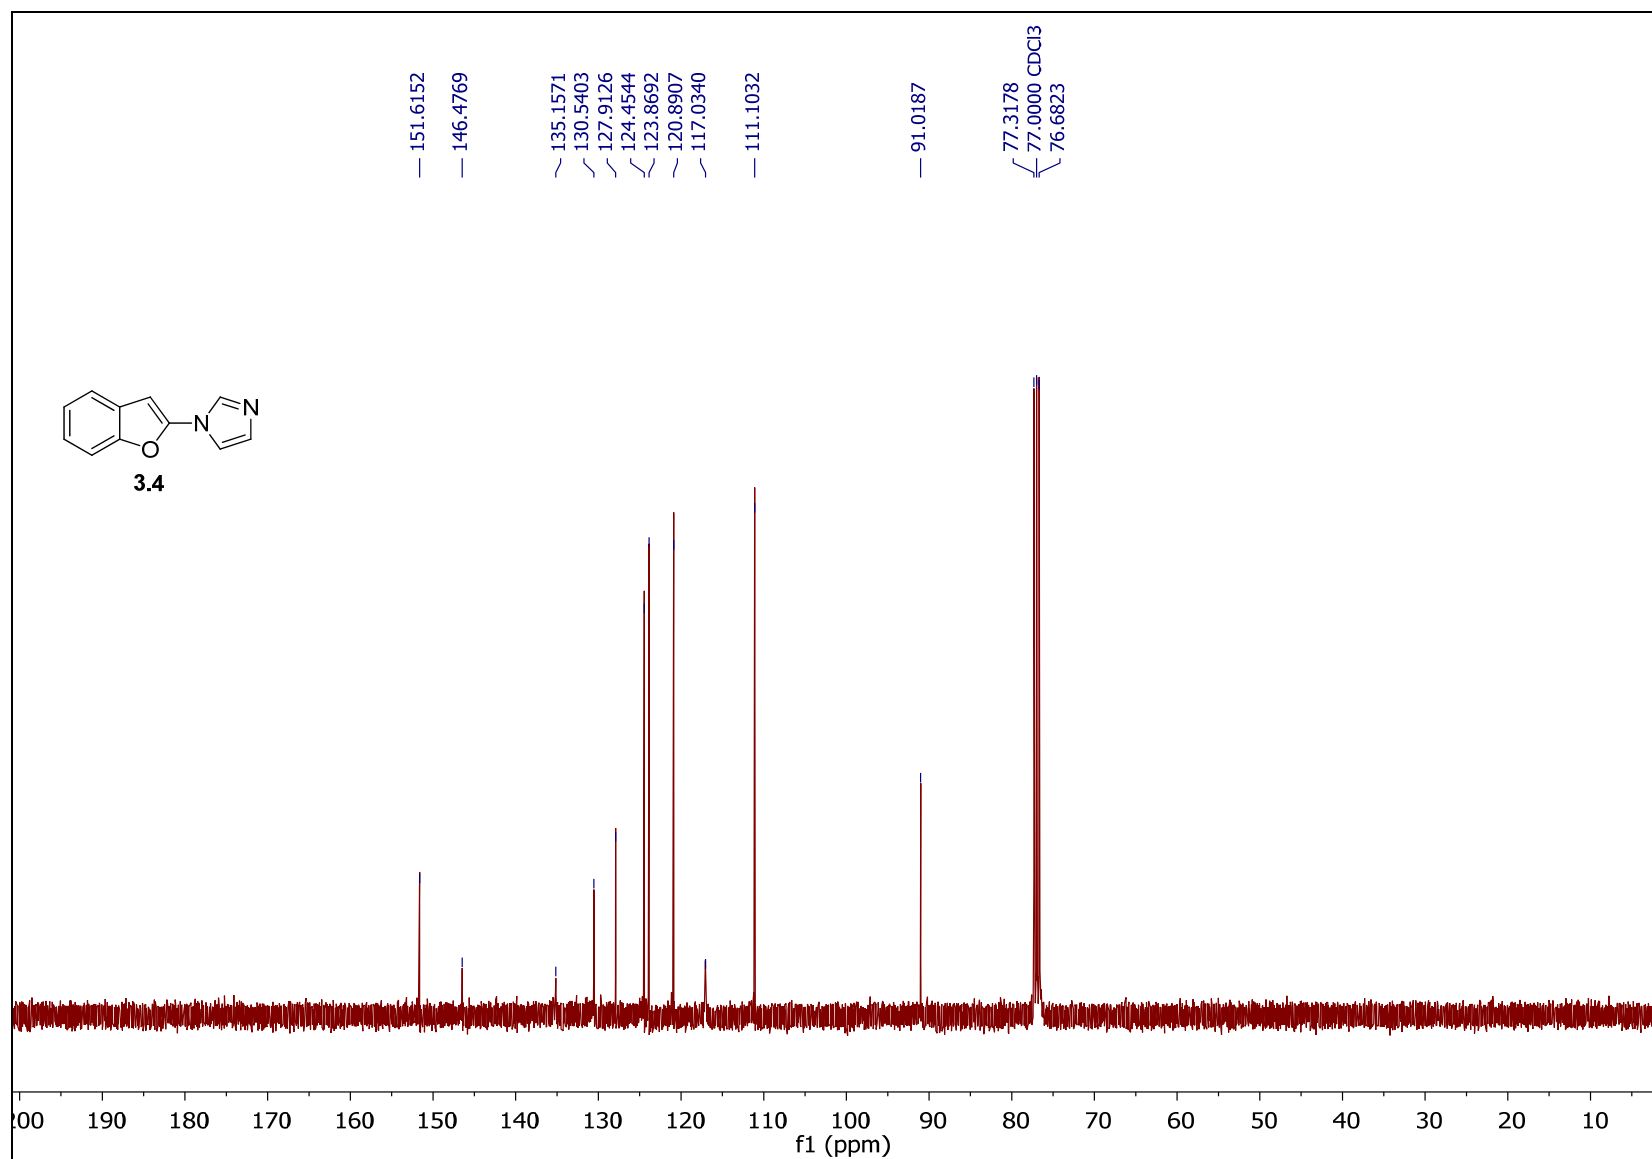

<sup>13</sup>C NMR (100 MHz, CDCl<sub>3</sub>) spectrum of **3.4**

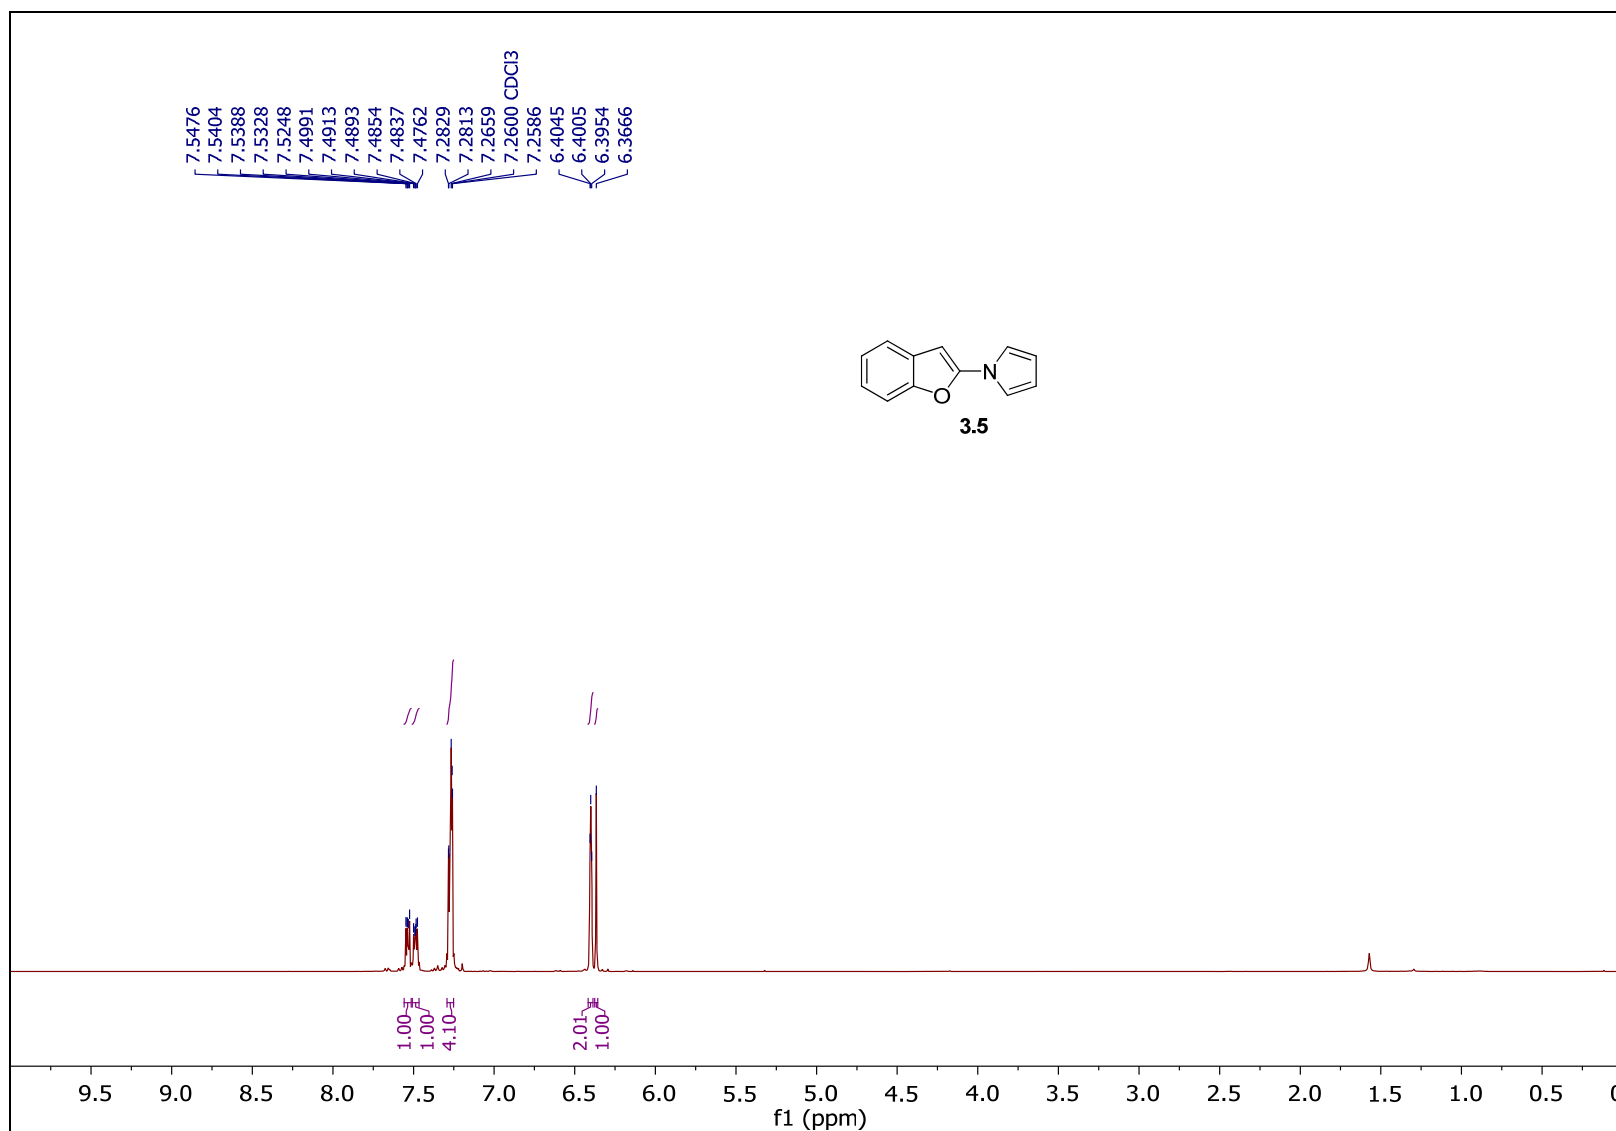

<sup>1</sup>H NMR (400 MHz, CDCl<sub>3</sub>) spectrum of **3.5**

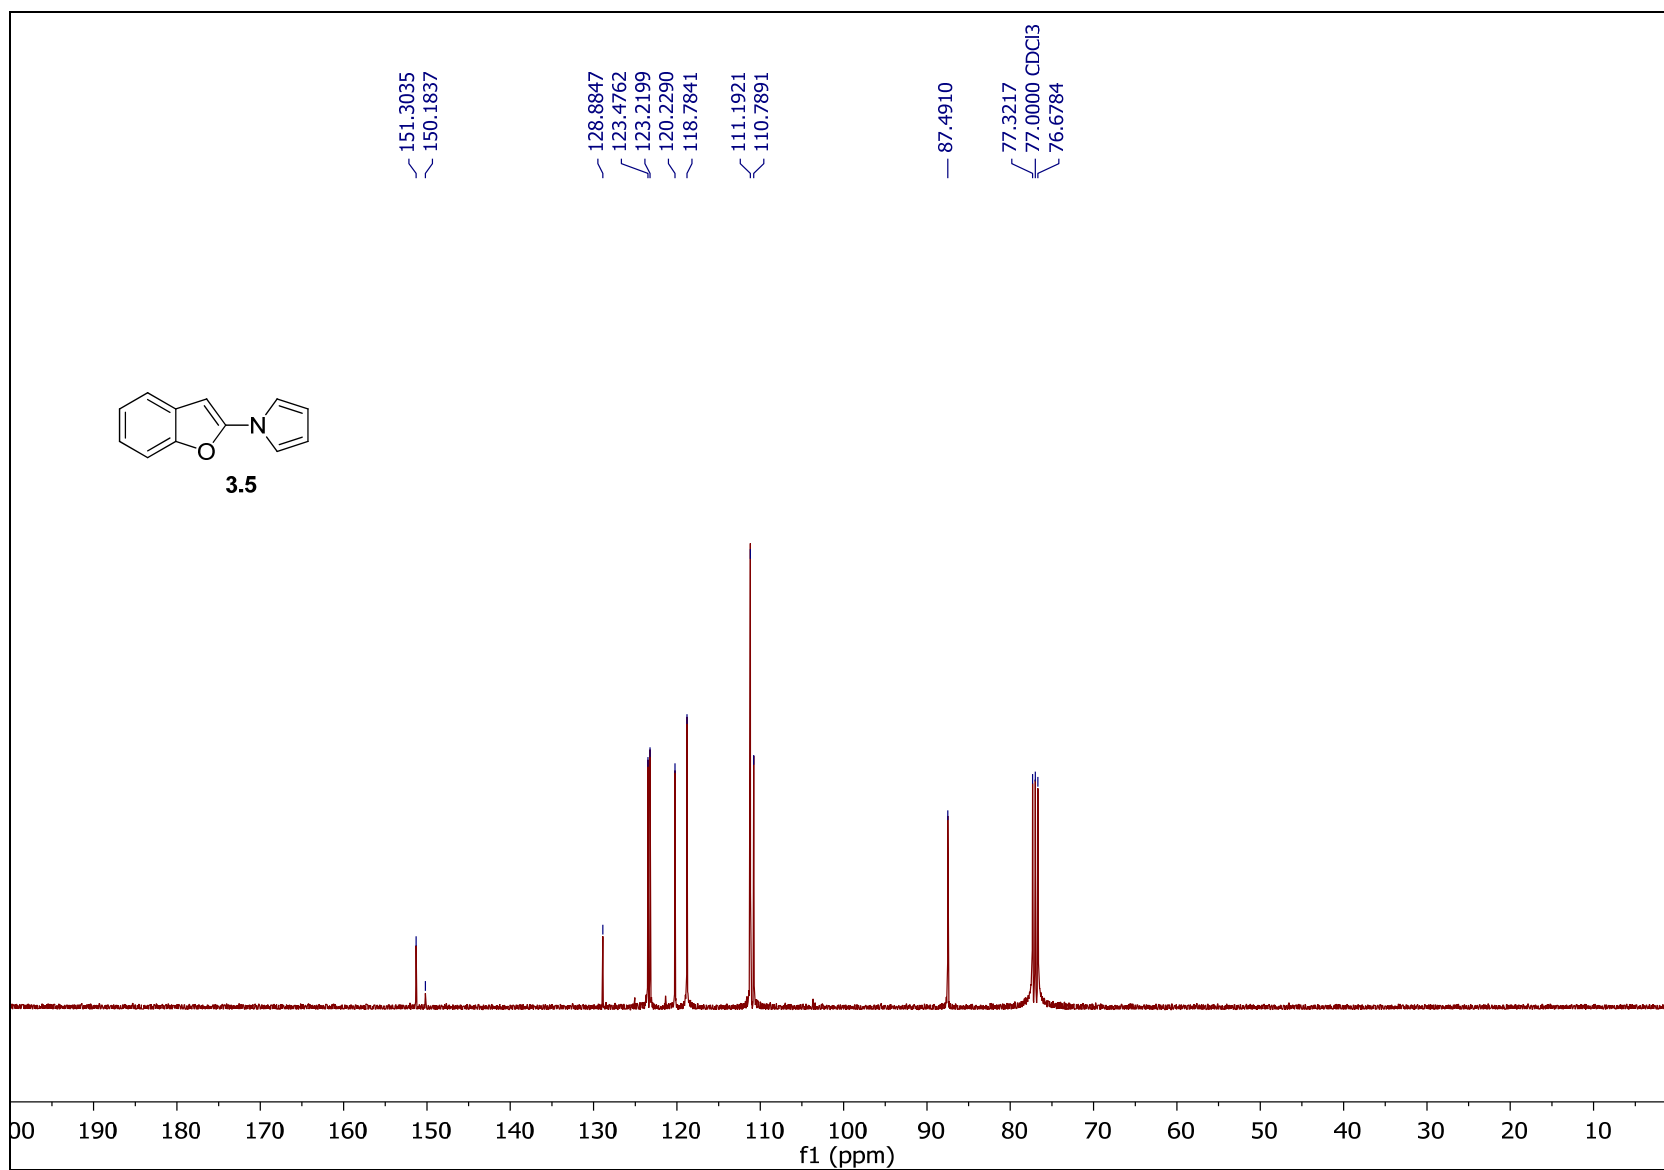

<sup>13</sup>C NMR (100 MHz, CDCl<sub>3</sub>) spectrum of **3.5**

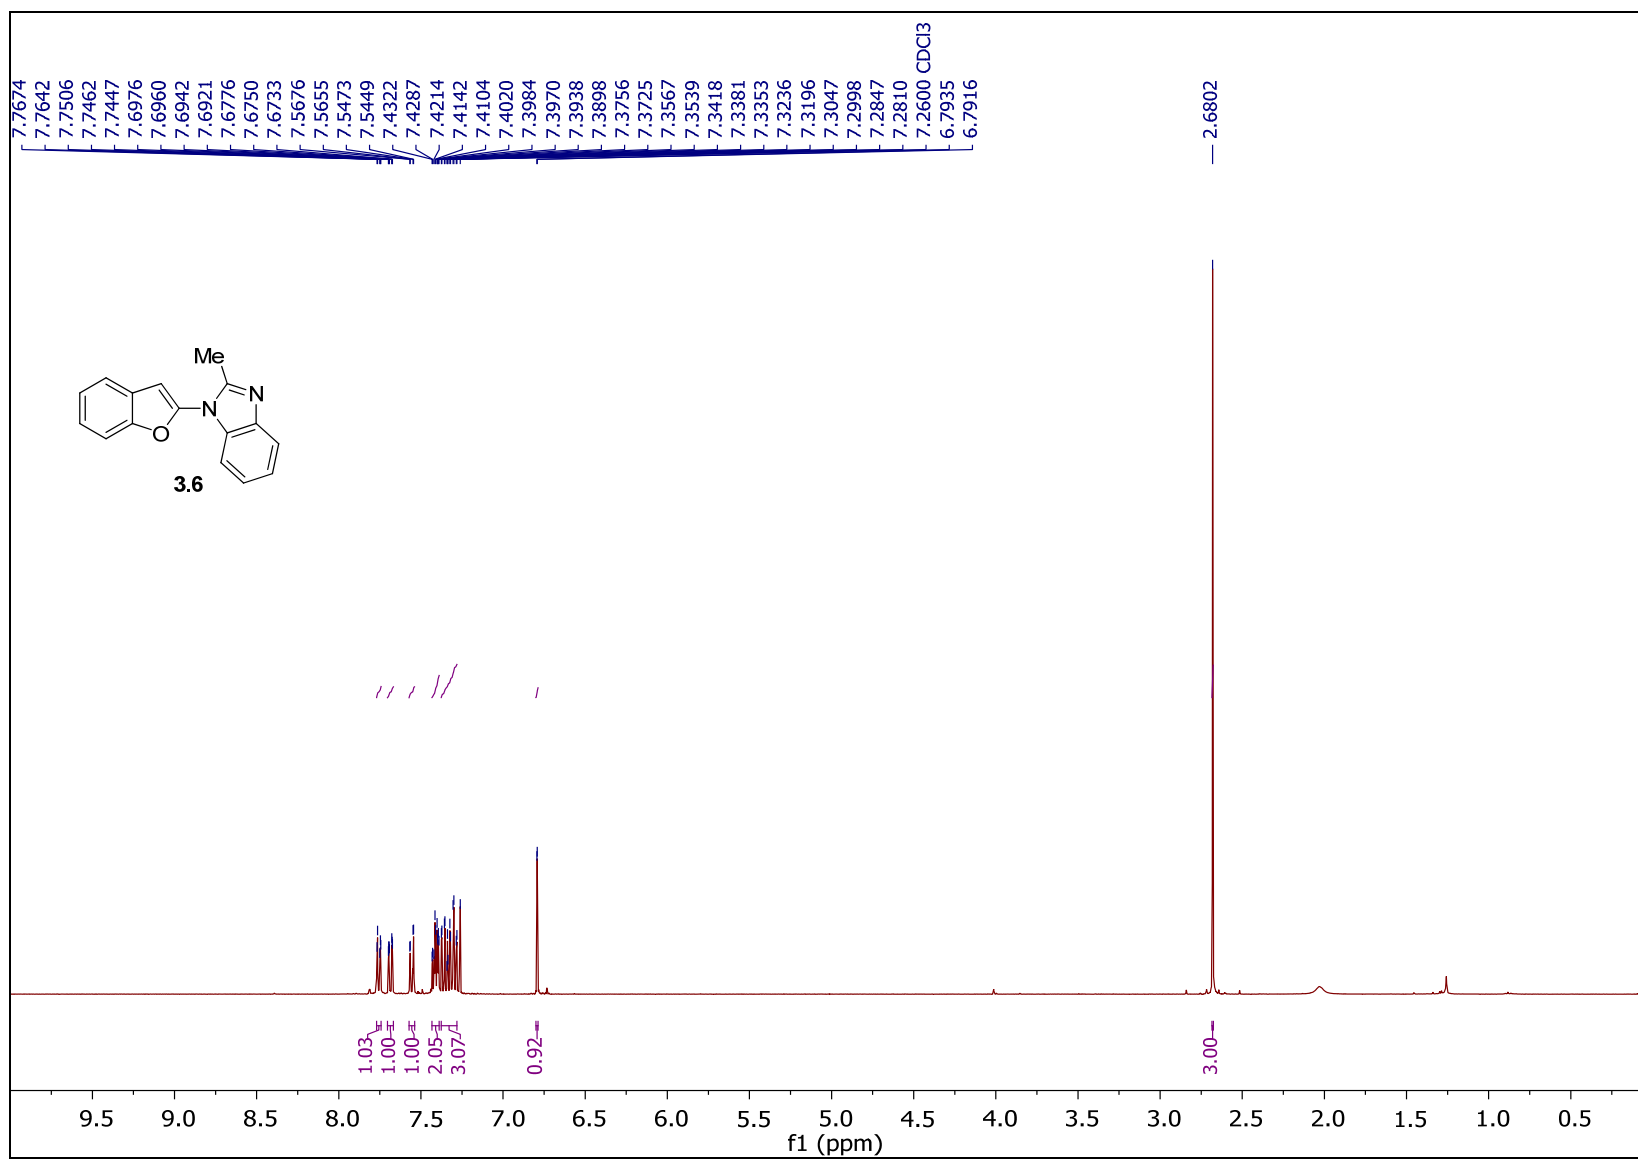

<sup>1</sup>H NMR (400 MHz, CDCl<sub>3</sub>) spectrum of **3.6**

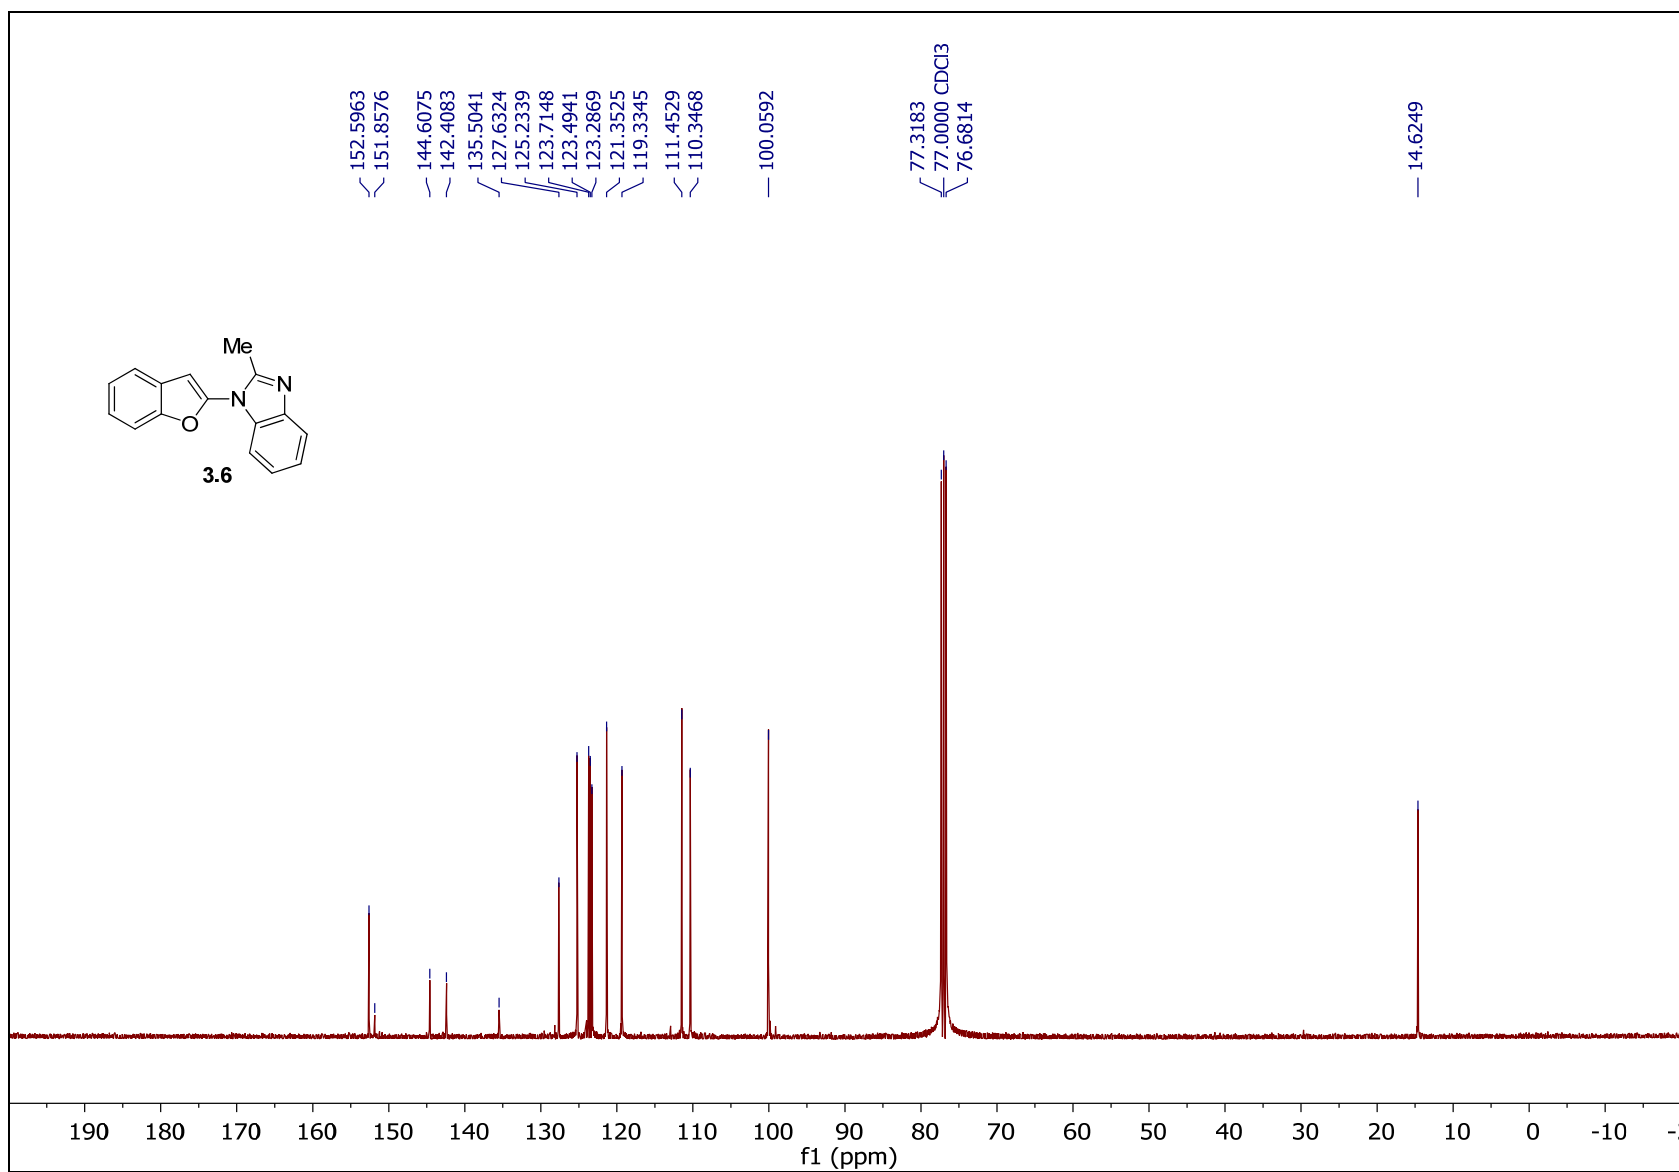

<sup>13</sup>C NMR (100 MHz, CDCl<sub>3</sub>) spectrum of **3.6**

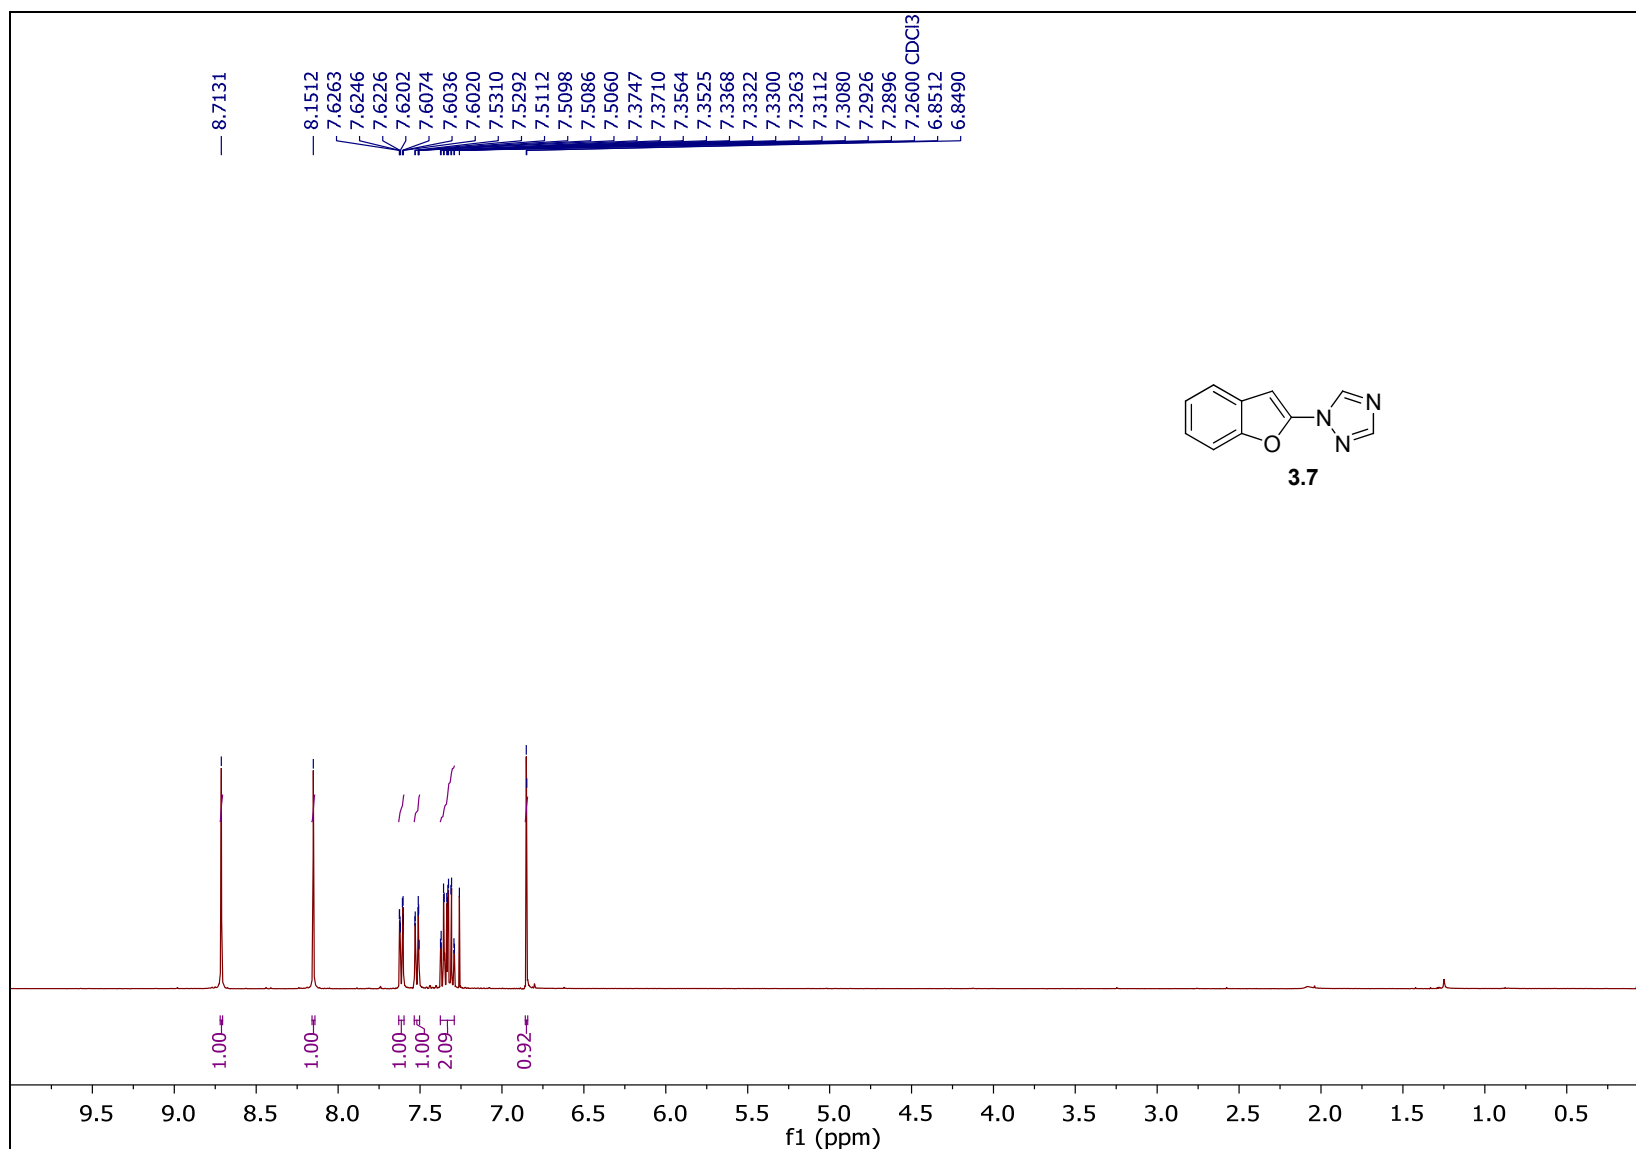

<sup>1</sup>H NMR (400 MHz, CDCl<sub>3</sub>) spectrum of **3.7**

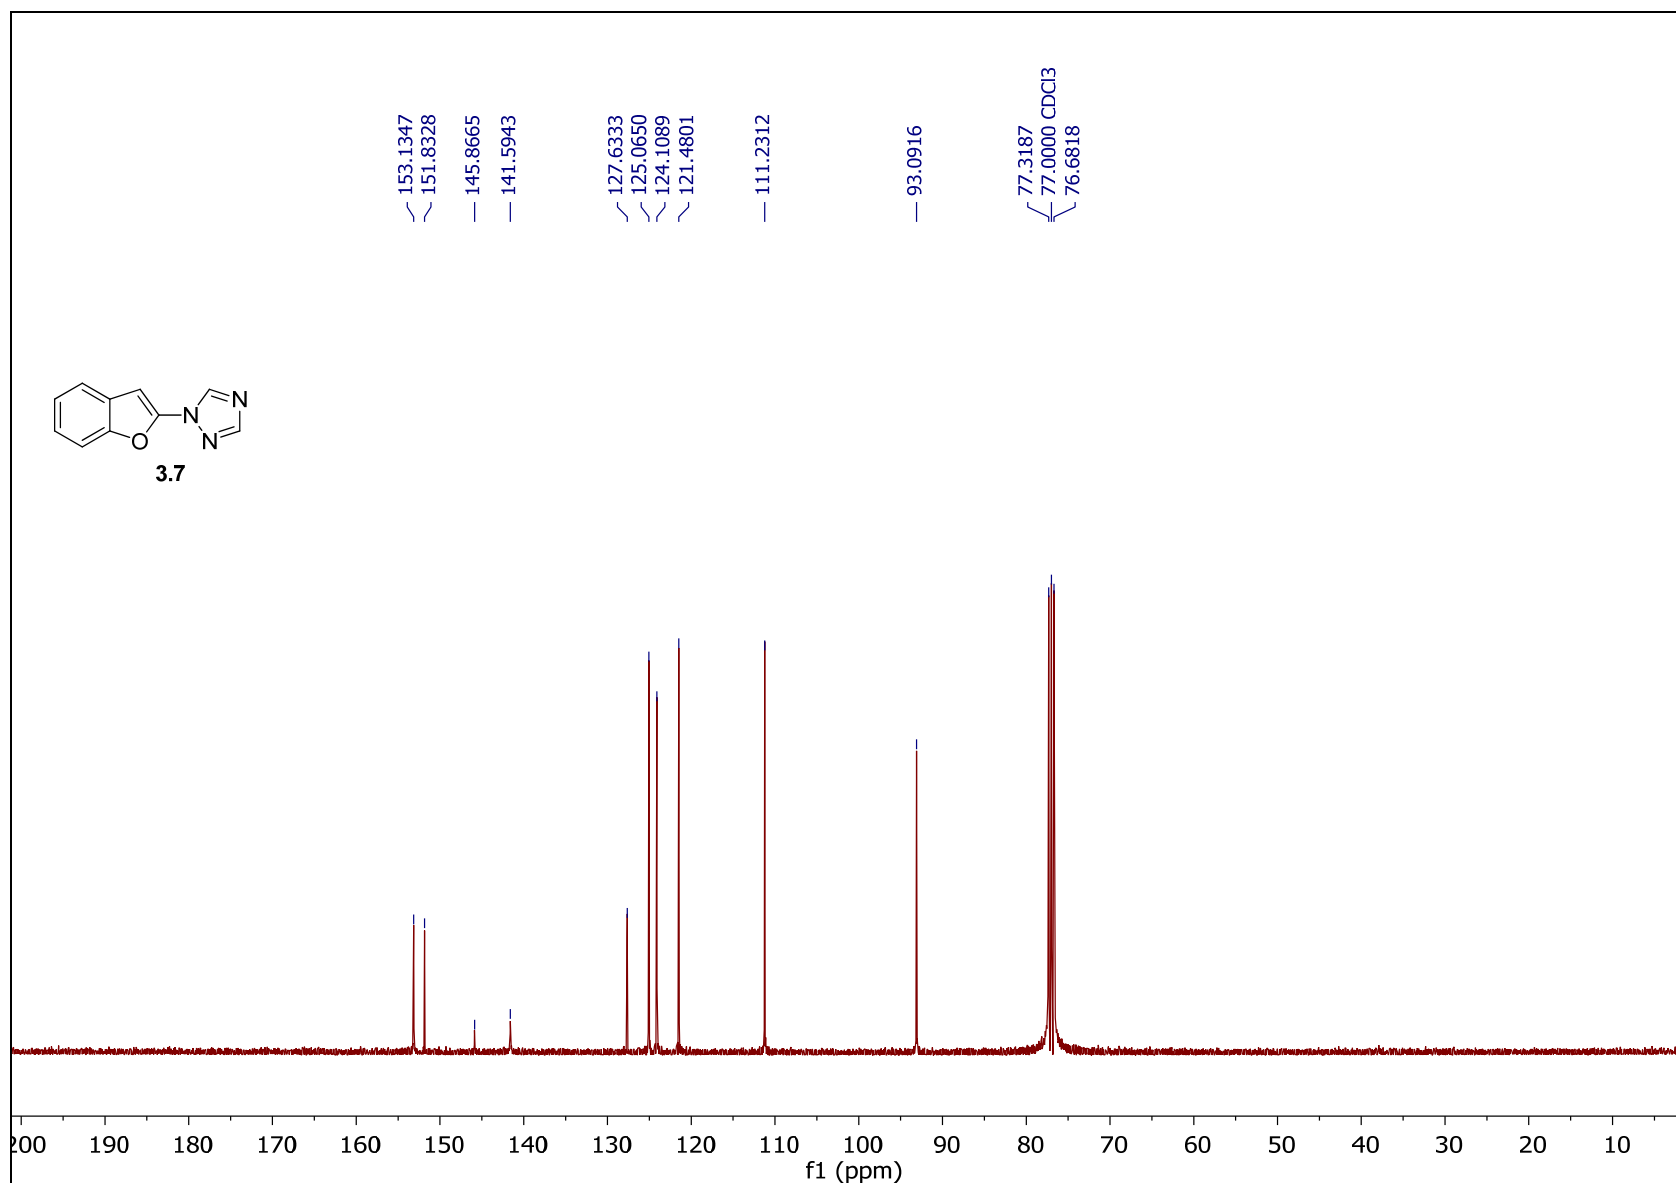

<sup>13</sup>C NMR (100 MHz, CDCl<sub>3</sub>) spectrum of **3.7**



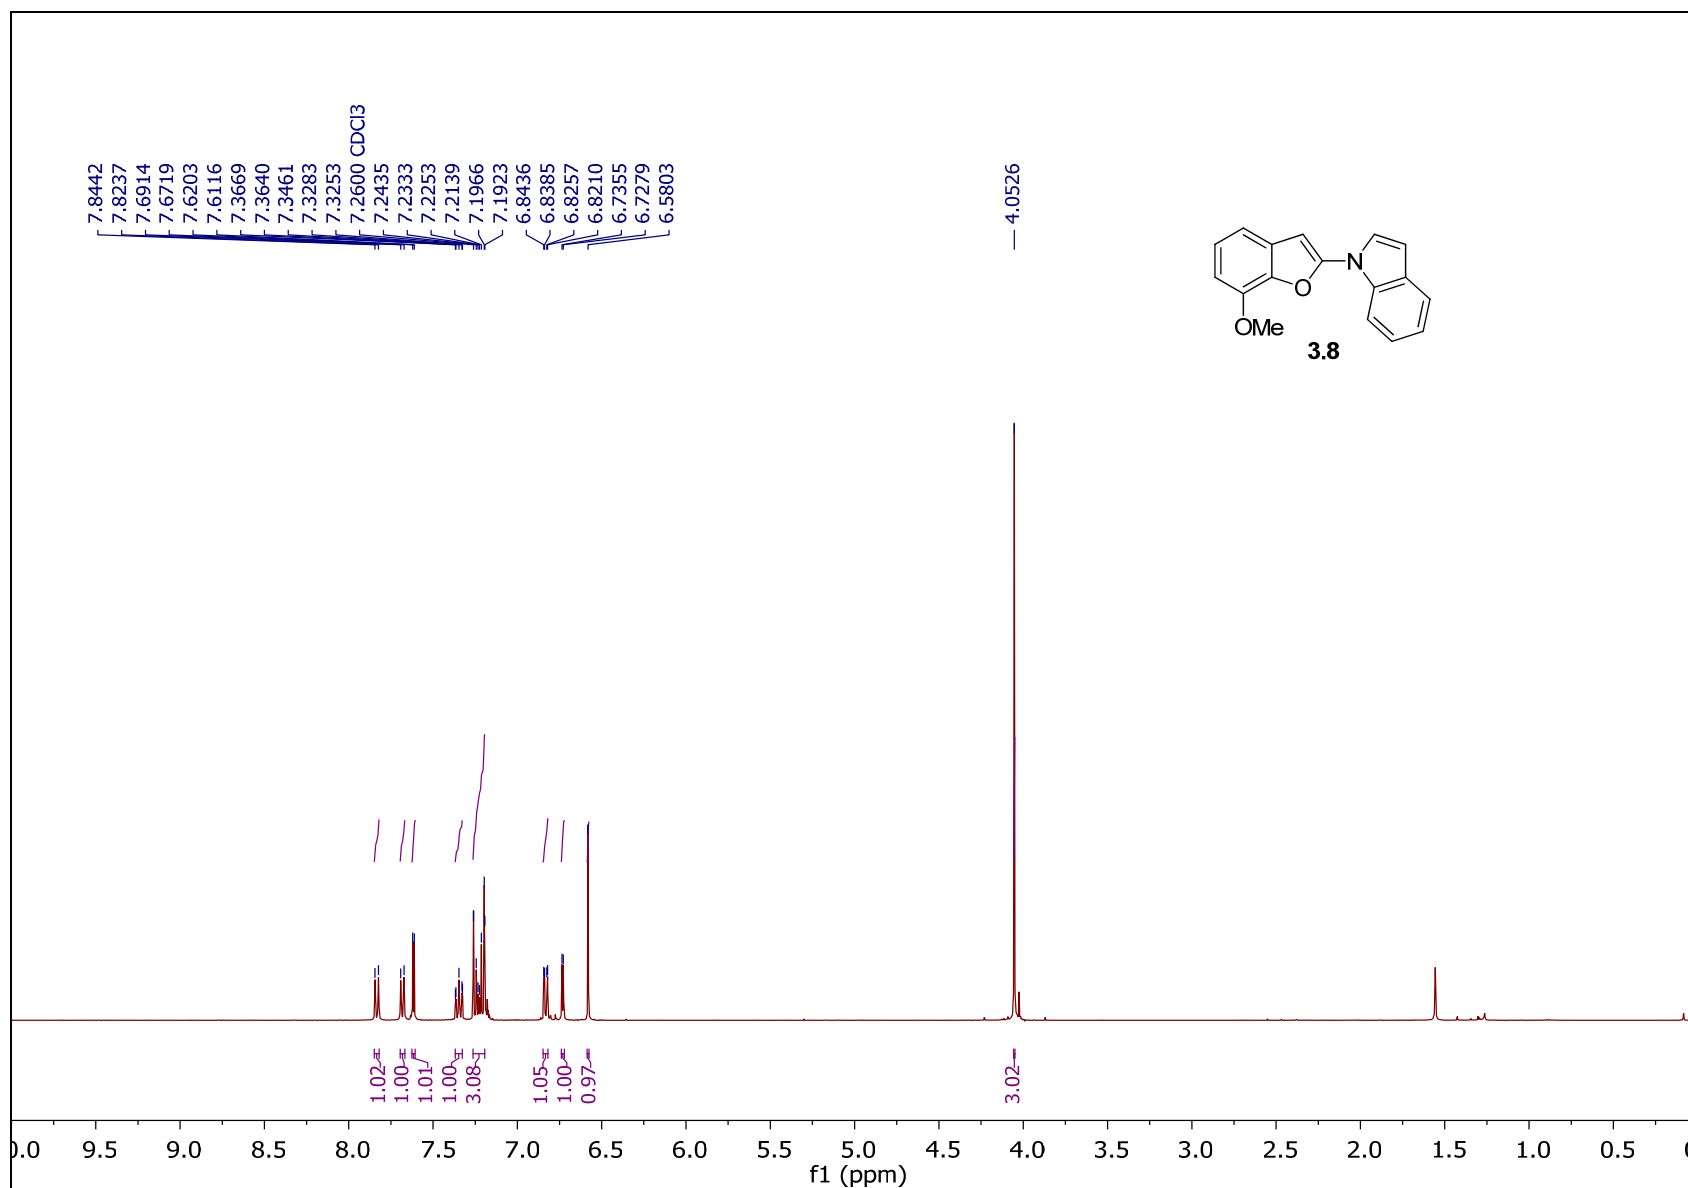

<sup>1</sup>H NMR (400 MHz, CDCl<sub>3</sub>) spectrum of **3.8**

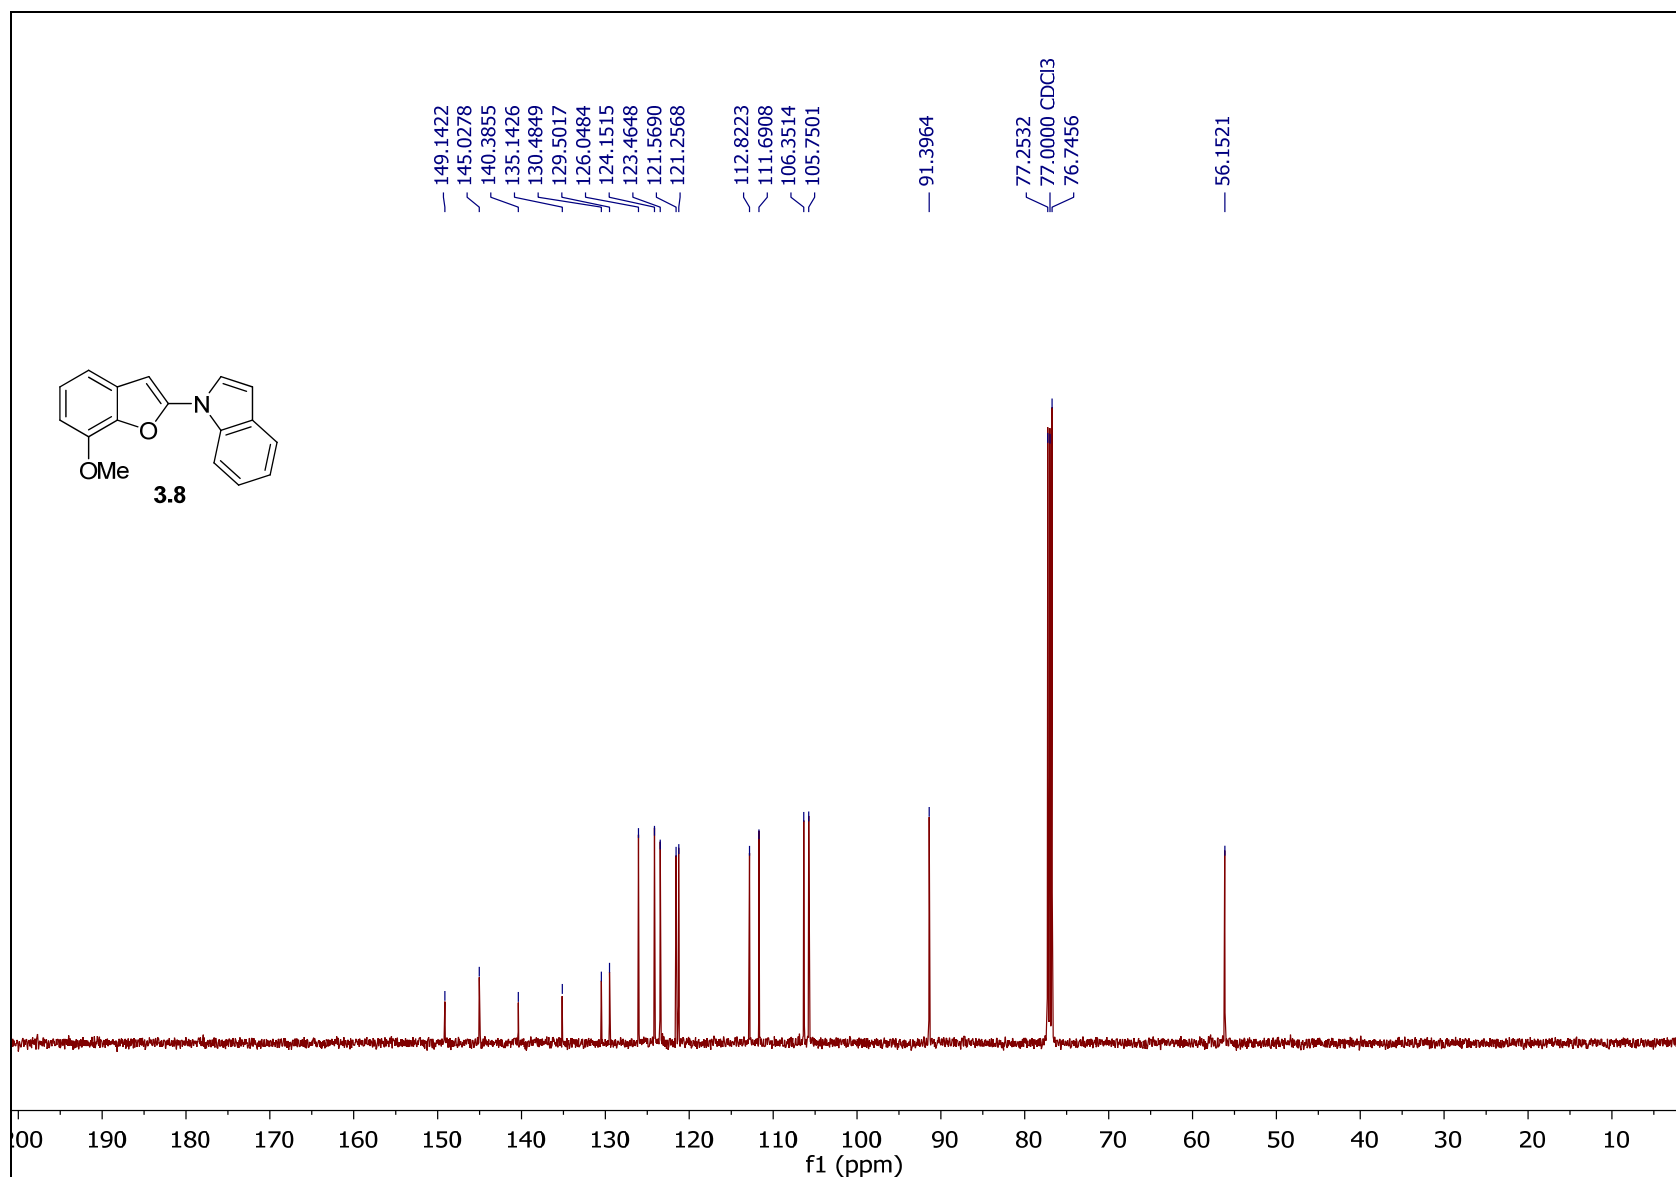

<sup>13</sup>C NMR (125 MHz, CDCl<sub>3</sub>) spectrum of **3.8**

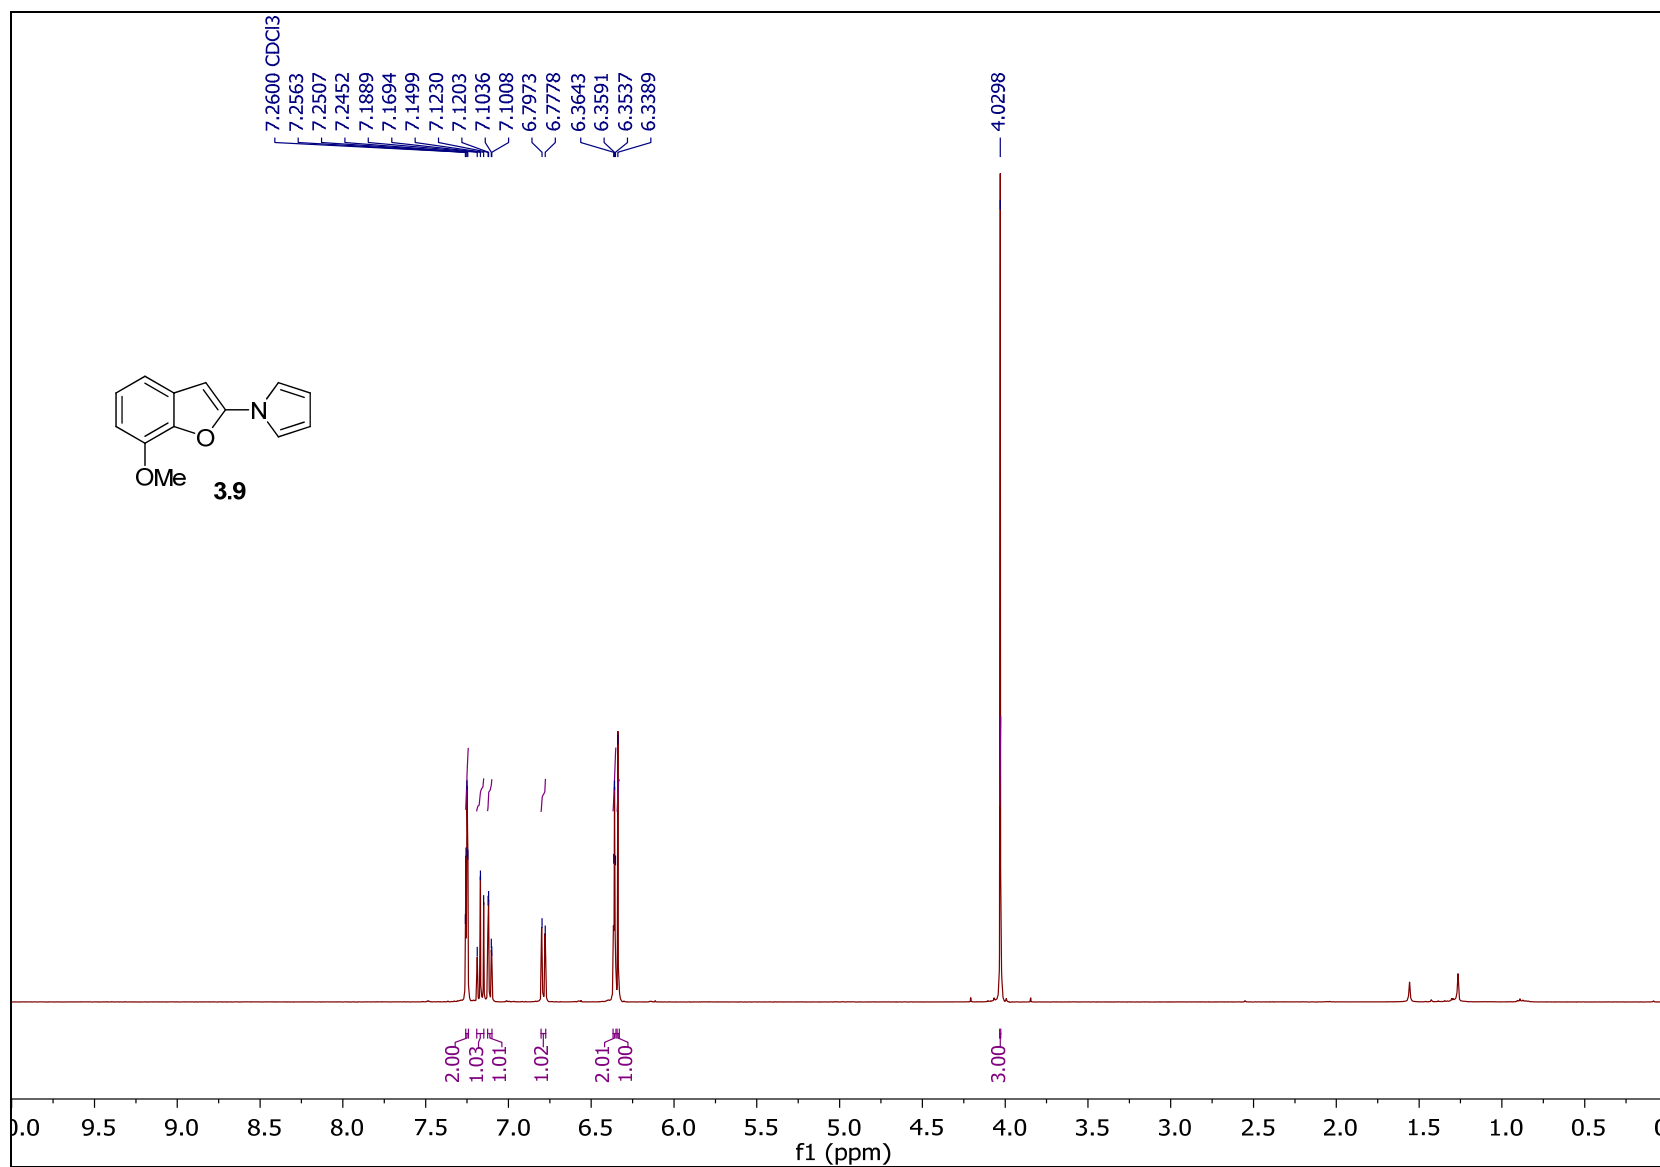

<sup>1</sup>H NMR (400 MHz, CDCl<sub>3</sub>) spectrum of **3.9**

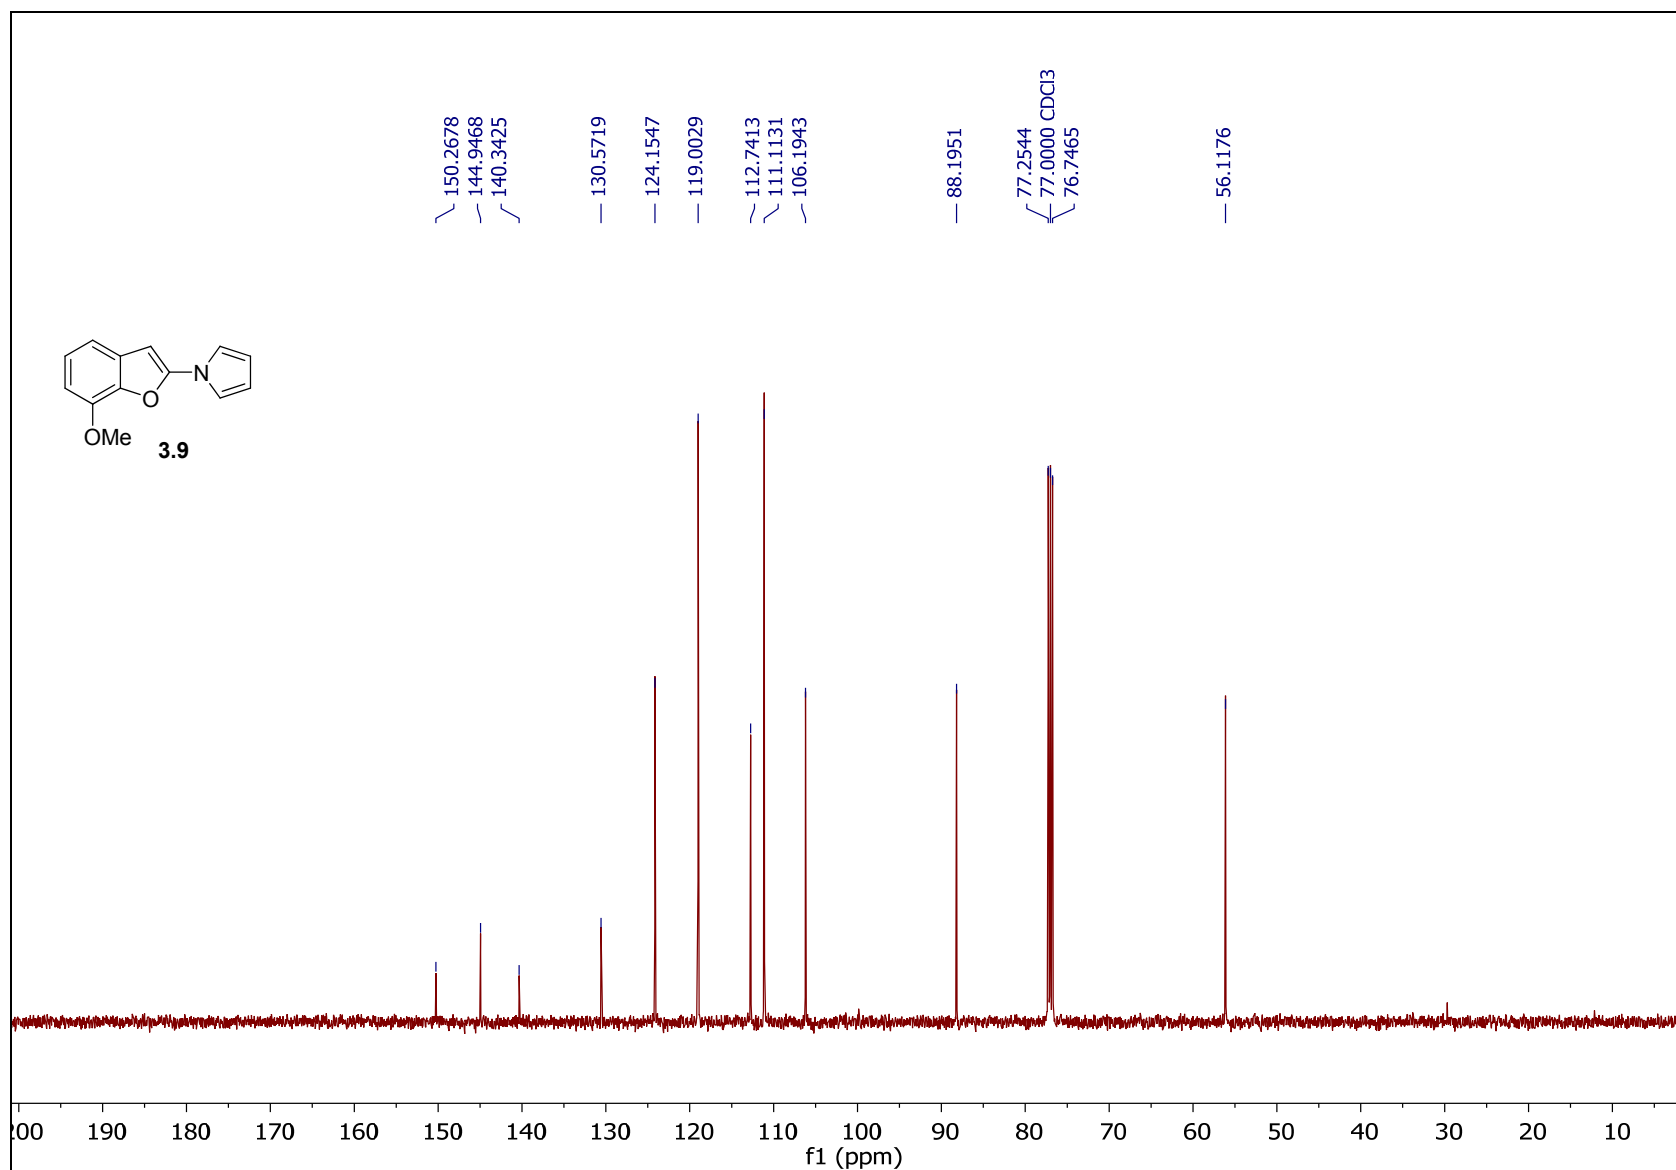

<sup>13</sup>C NMR (125 MHz, CDCl<sub>3</sub>) spectrum of **3.9**

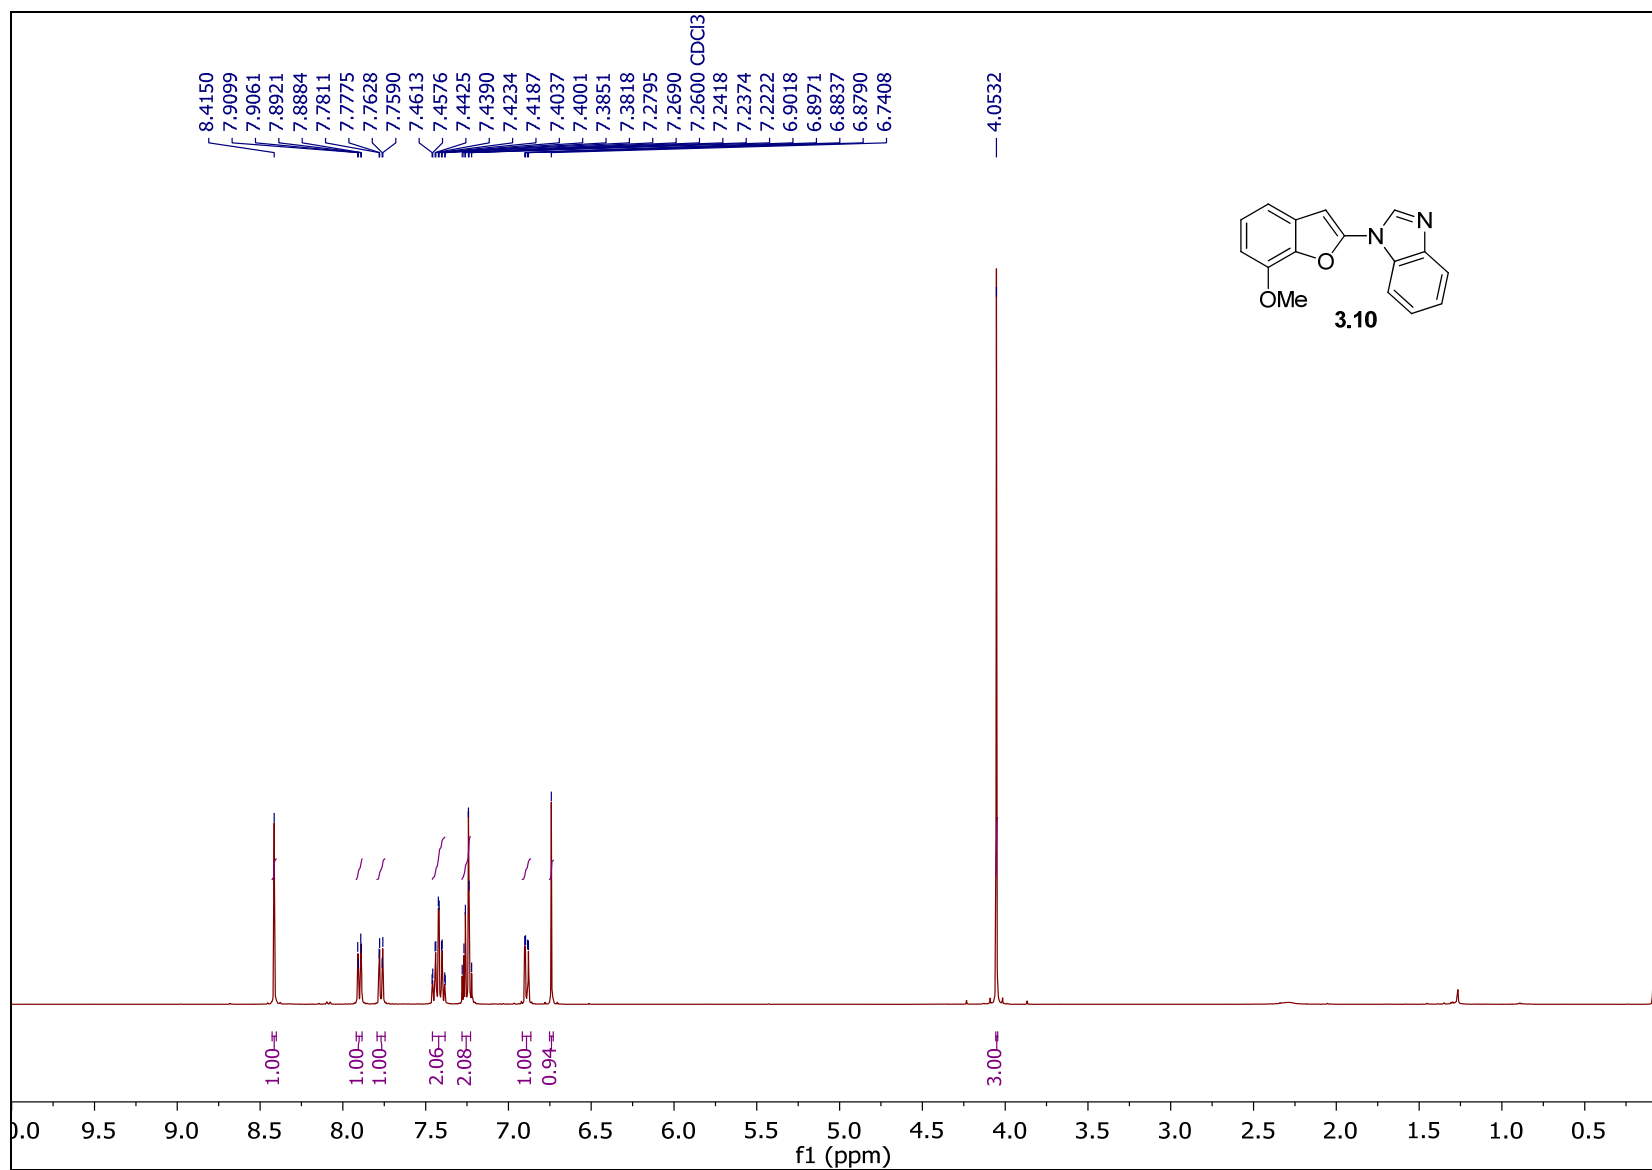

<sup>1</sup>H NMR (400 MHz, CDCl<sub>3</sub>) spectrum of **3.10**

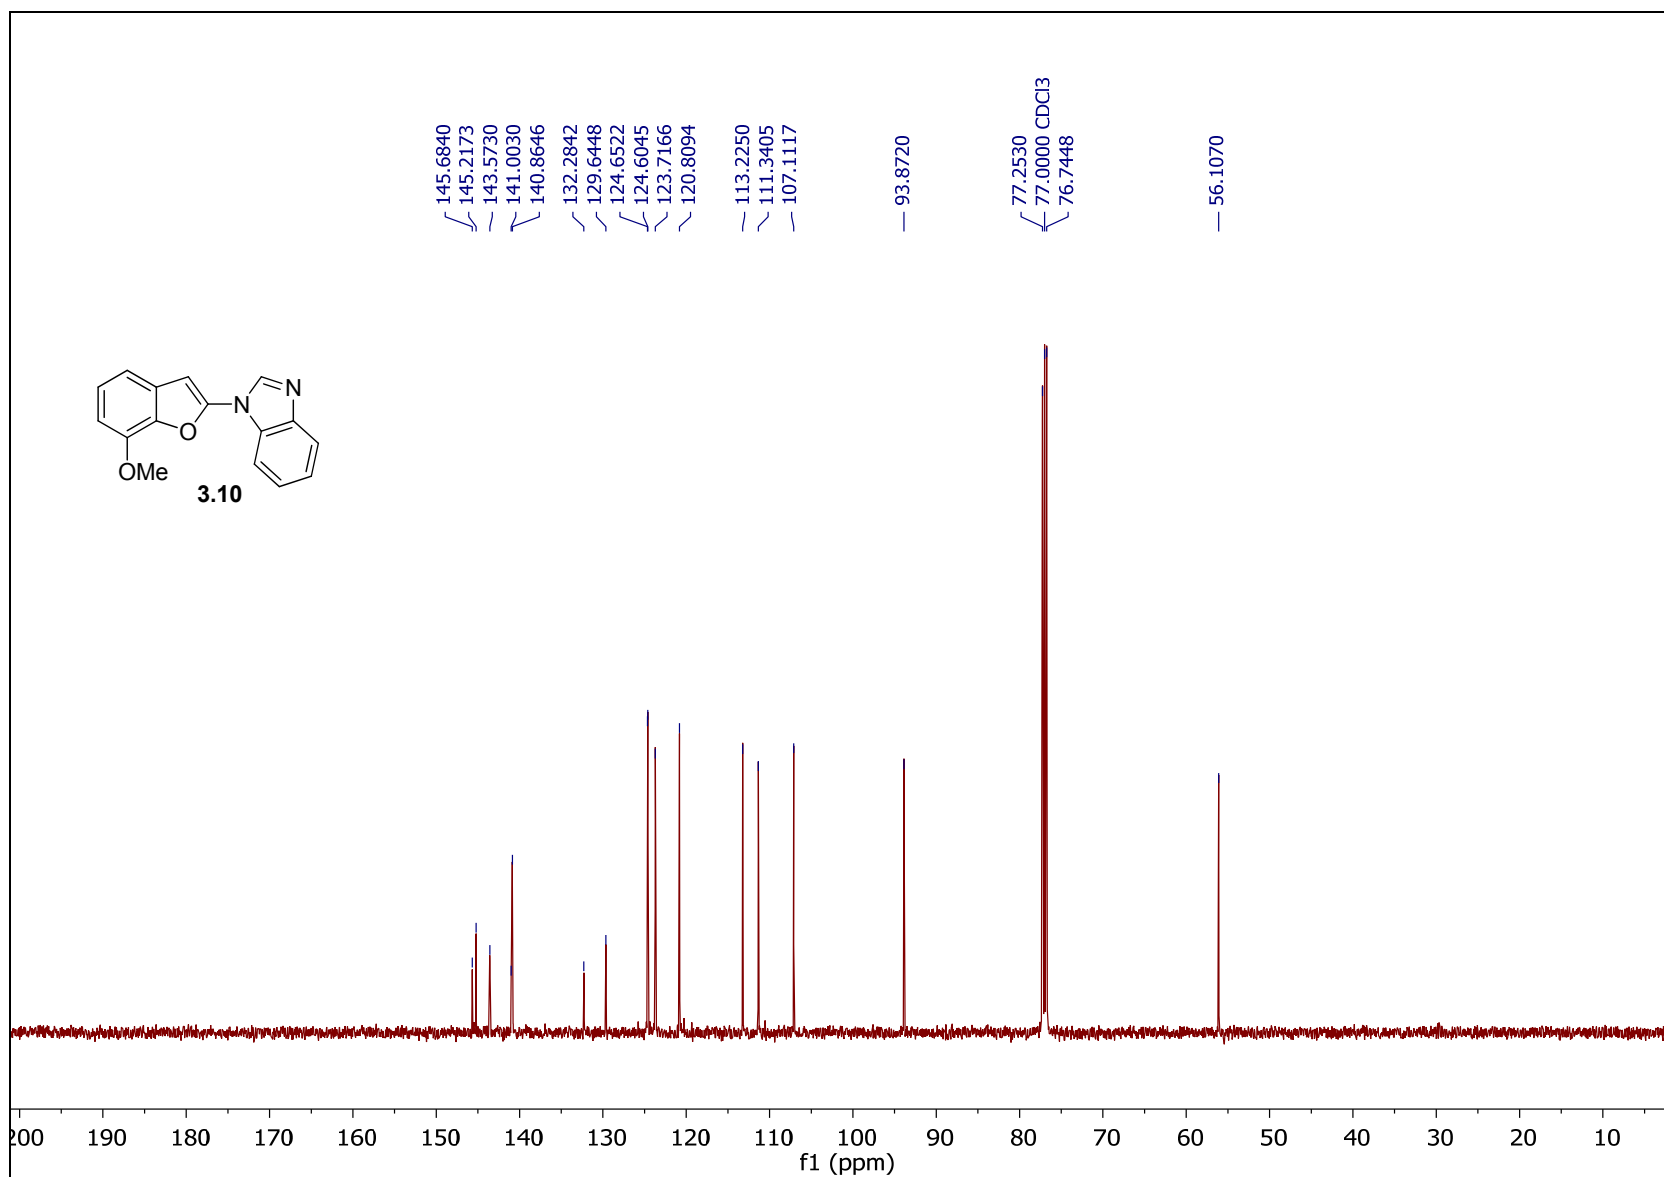

<sup>13</sup>C NMR (125 MHz, CDCl<sub>3</sub>) spectrum of **3.10**

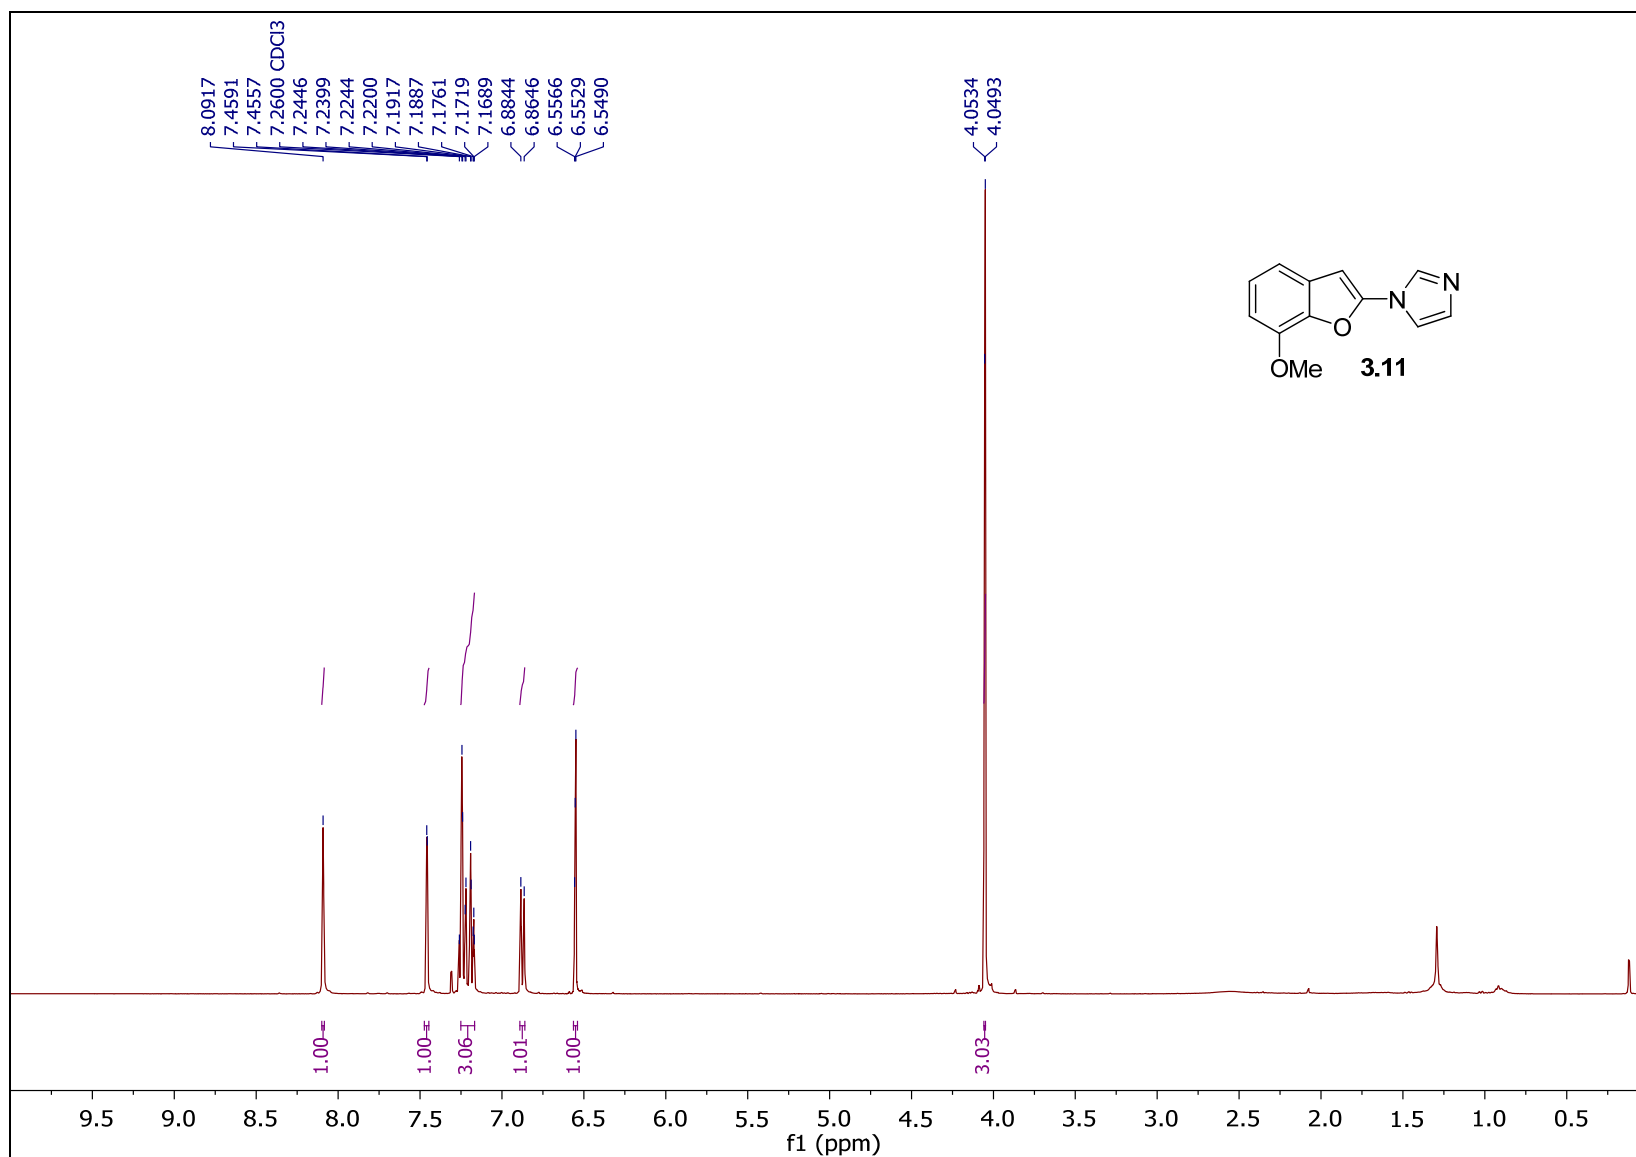

<sup>1</sup>H NMR (400 MHz, CDCl<sub>3</sub>) spectrum of **3.11**

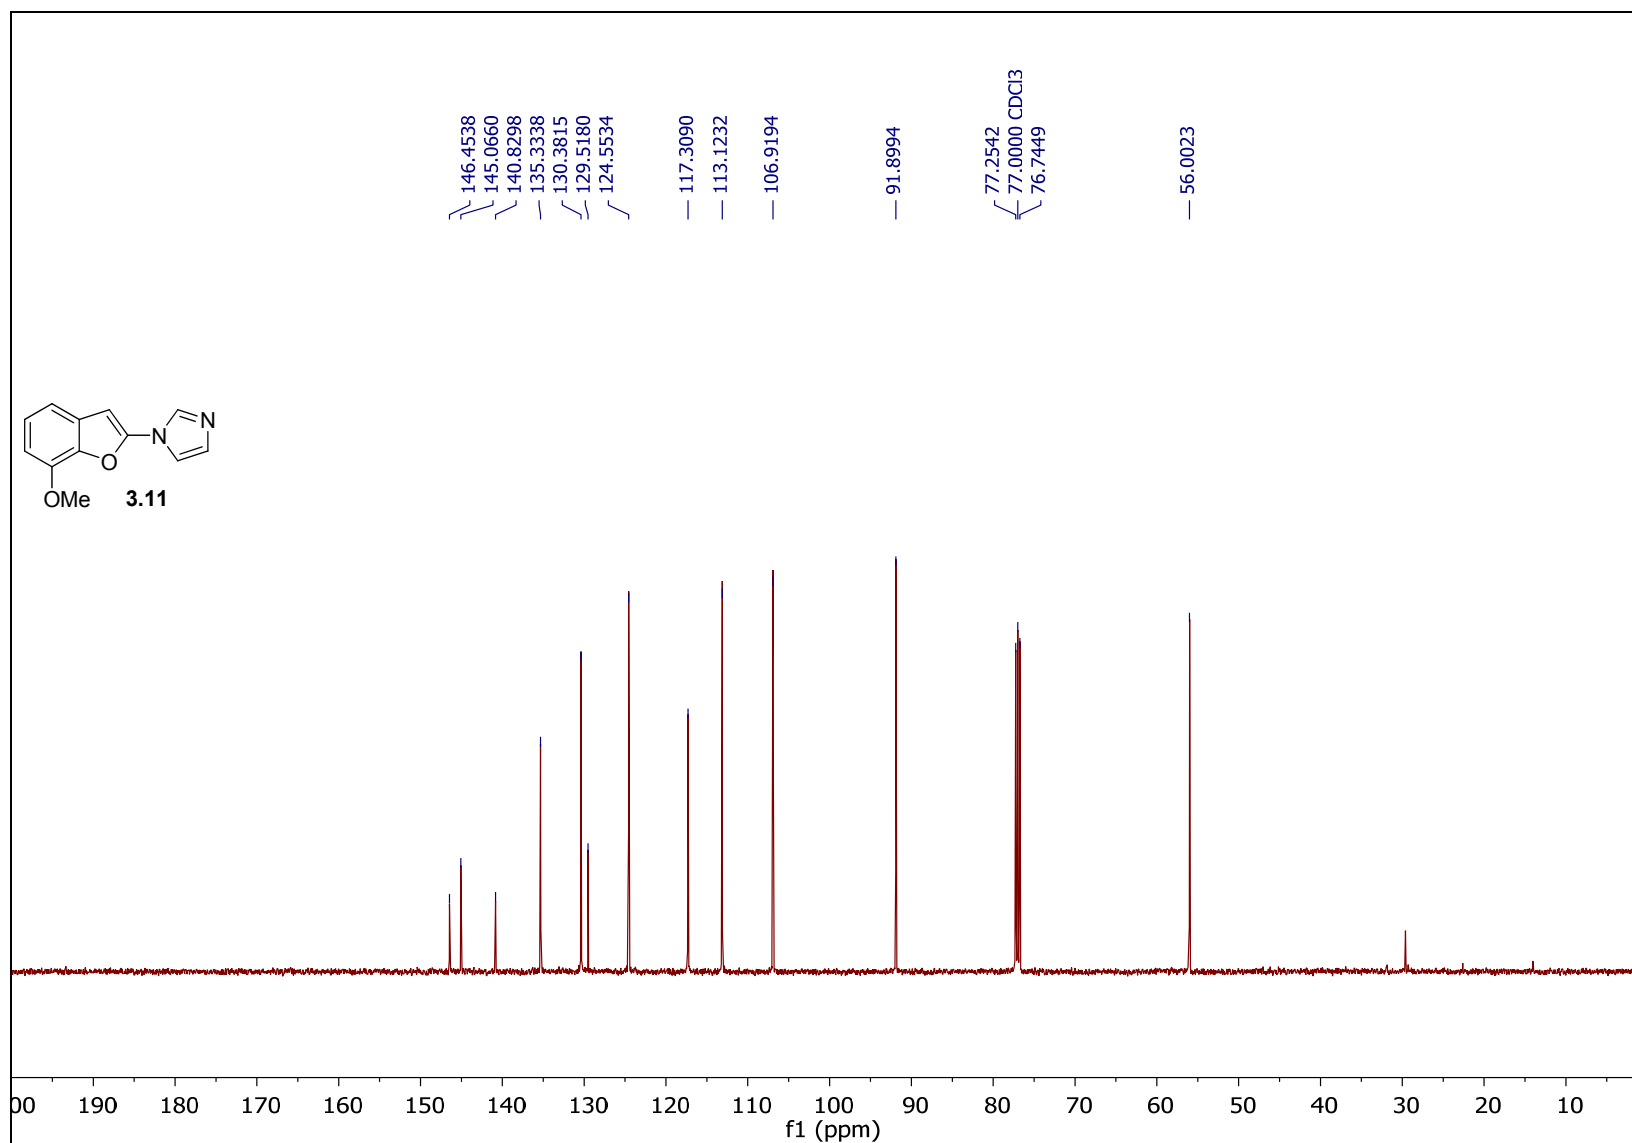

<sup>13</sup>C NMR (125 MHz, CDCl<sub>3</sub>) spectrum of **3.11**



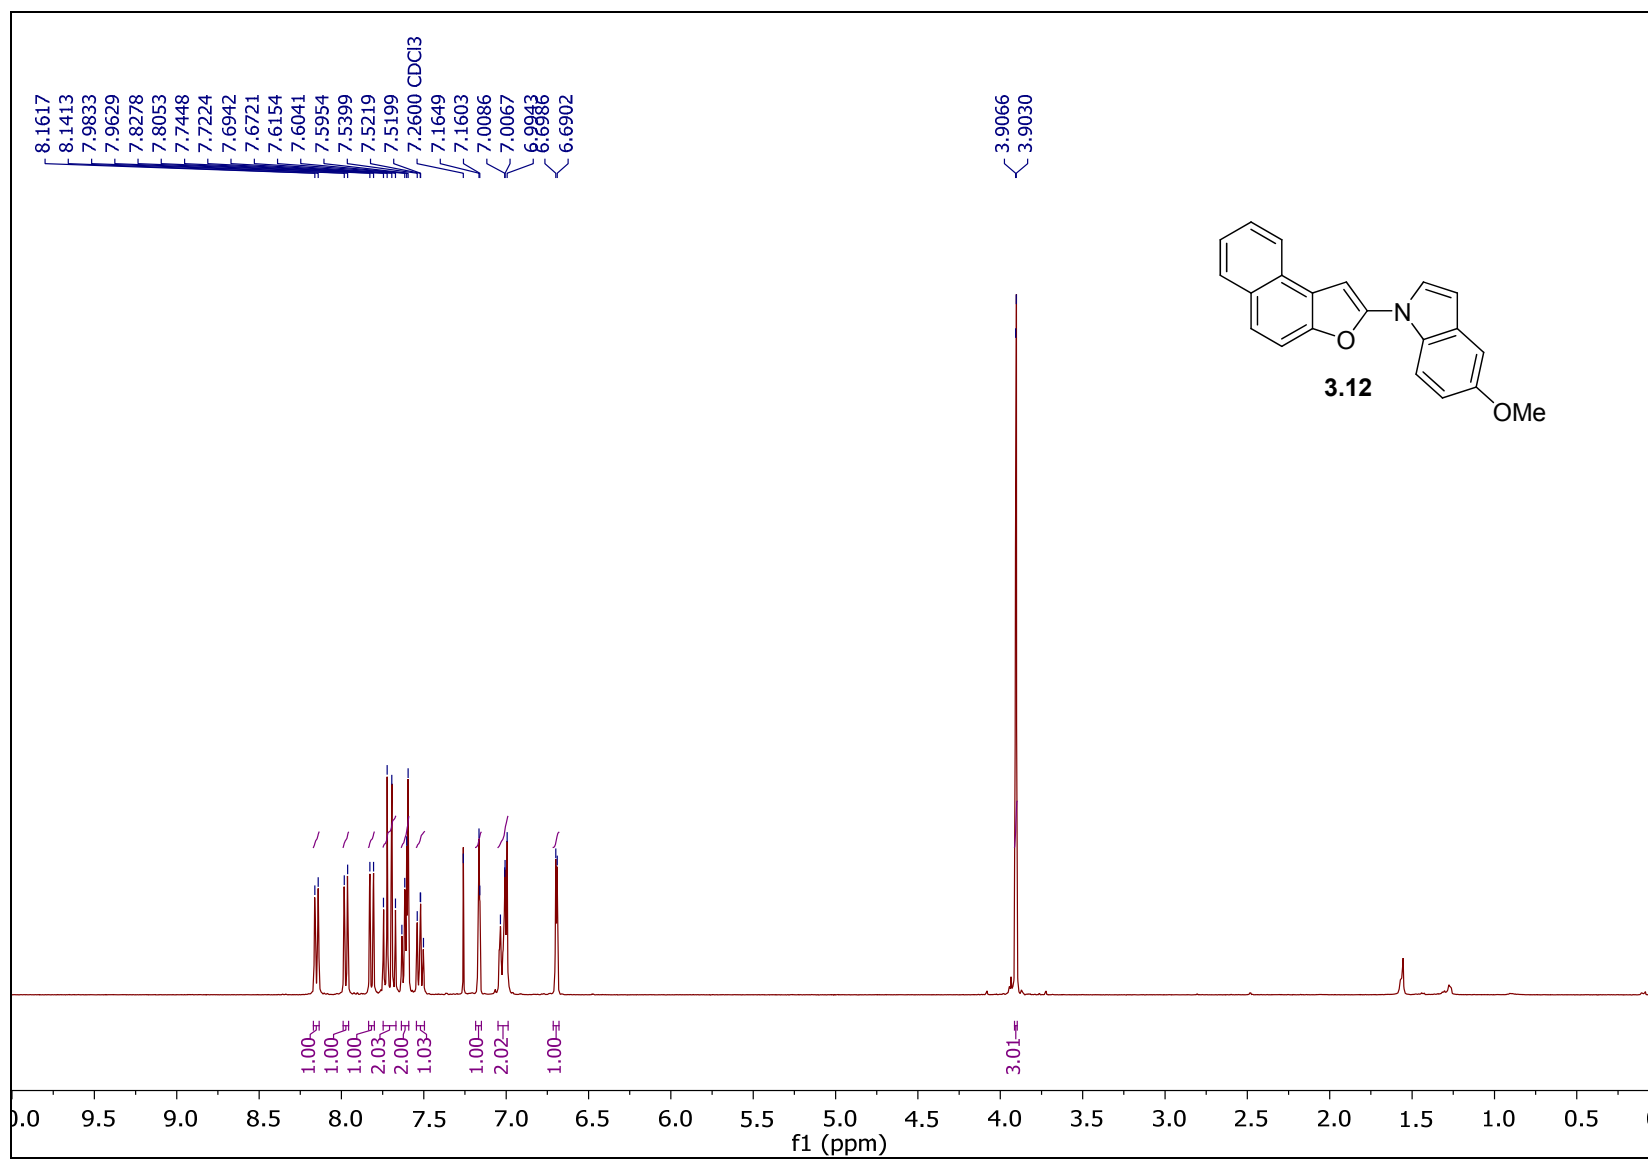

<sup>1</sup>H NMR (400 MHz, CDCl<sub>3</sub>) spectrum of **3.12**

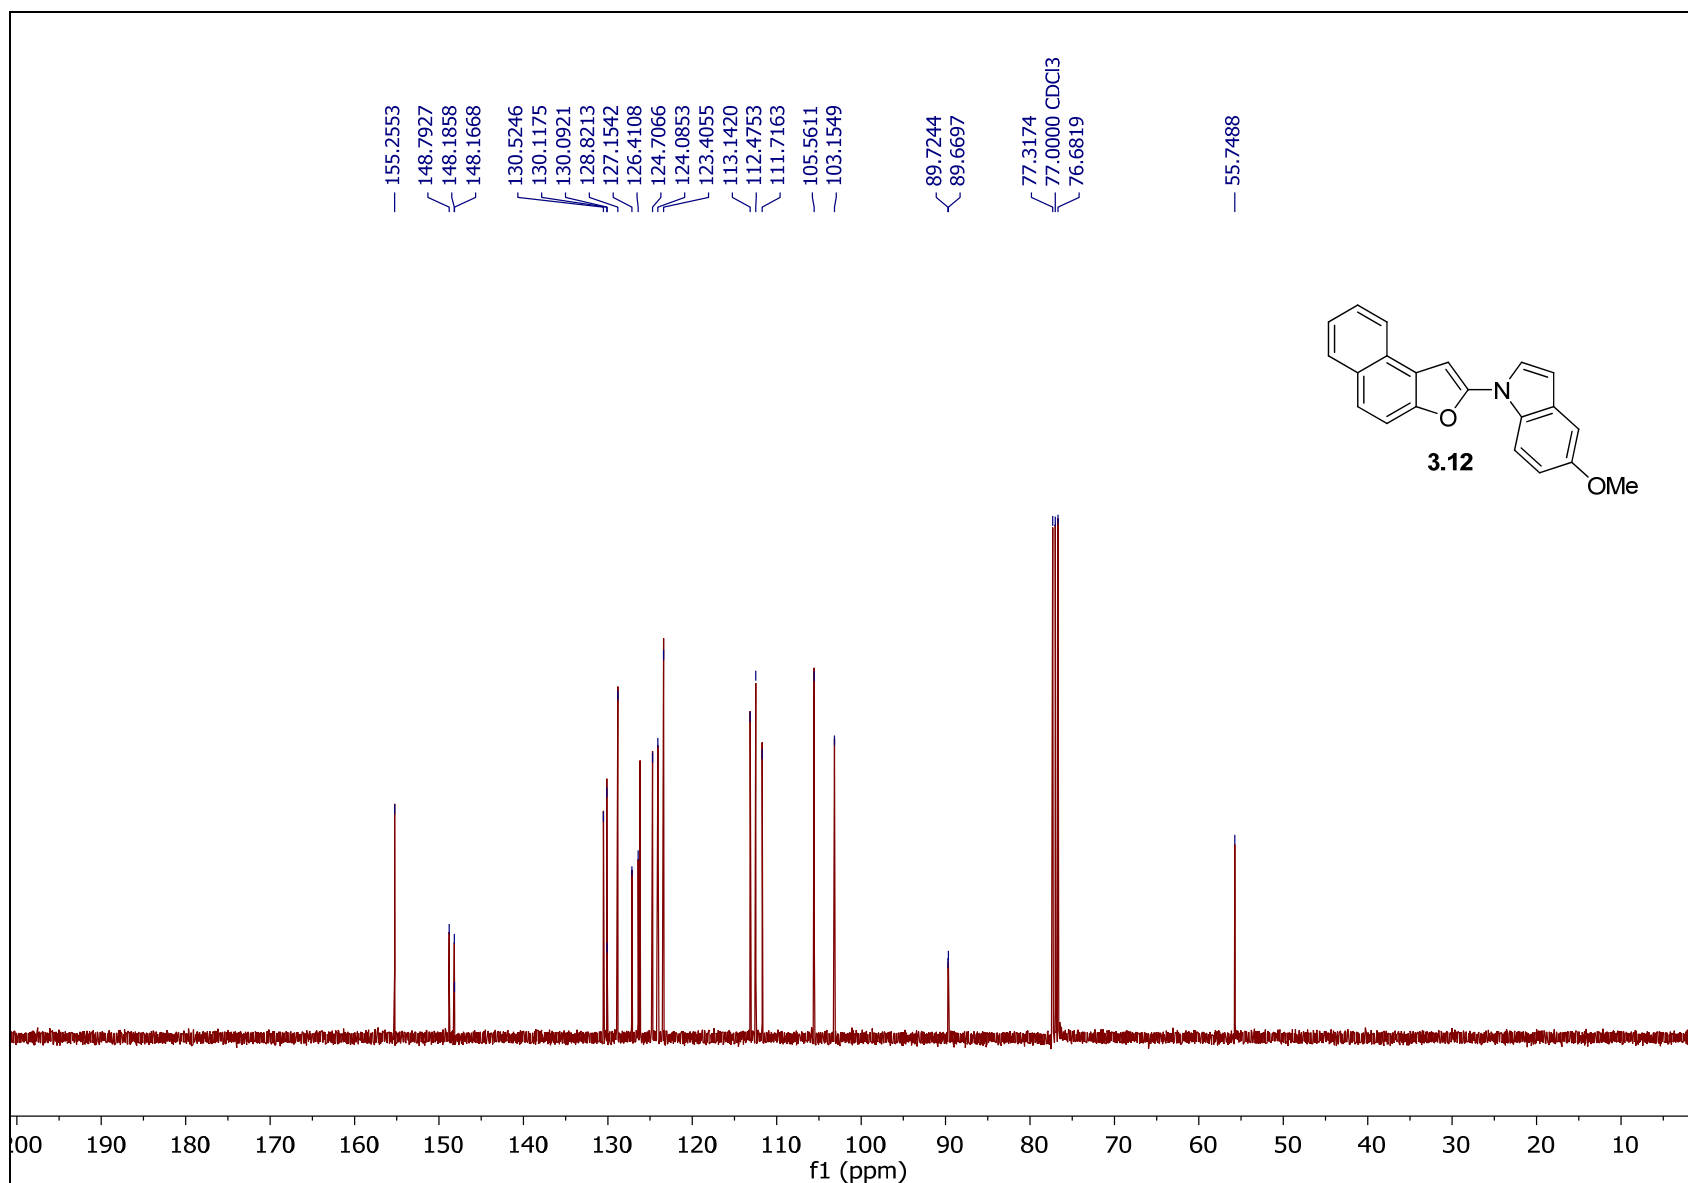

$^{13}\text{C}$  NMR (100 MHz,  $\text{CDCl}_3$ ) spectrum of **3.12**

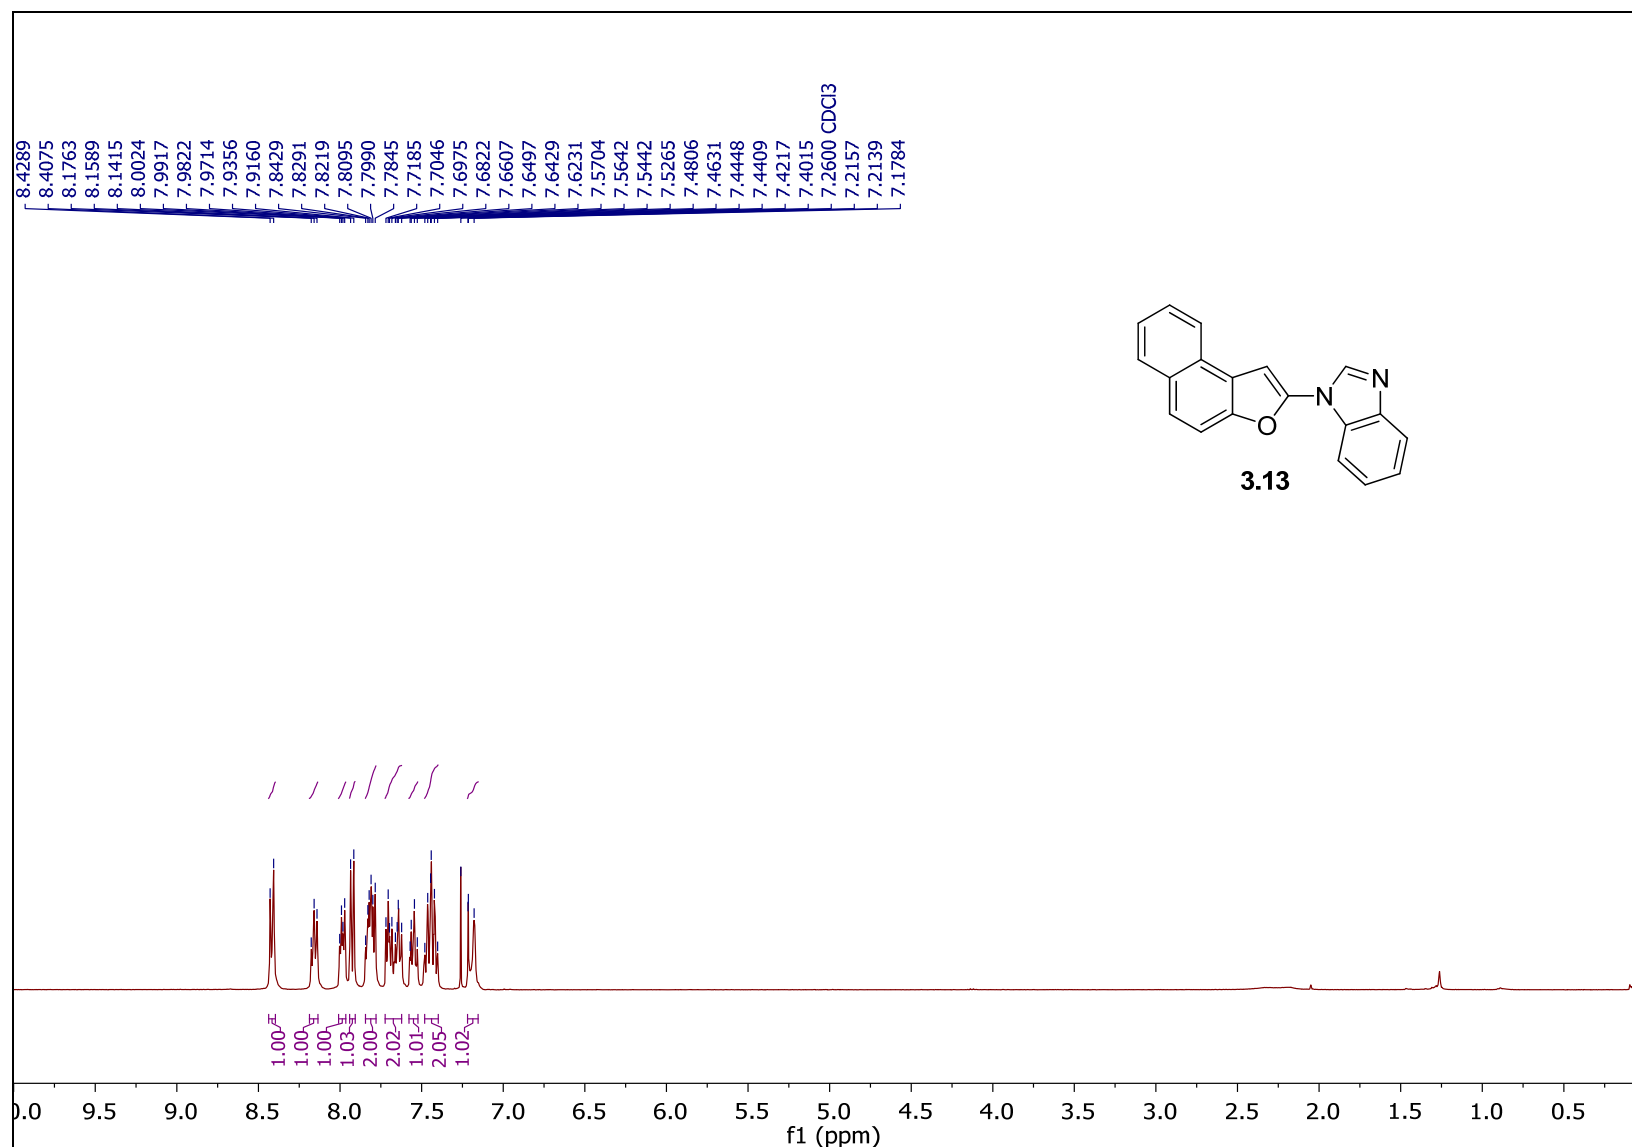

<sup>1</sup>H NMR (400 MHz, CDCl<sub>3</sub>) spectrum of **3.13**

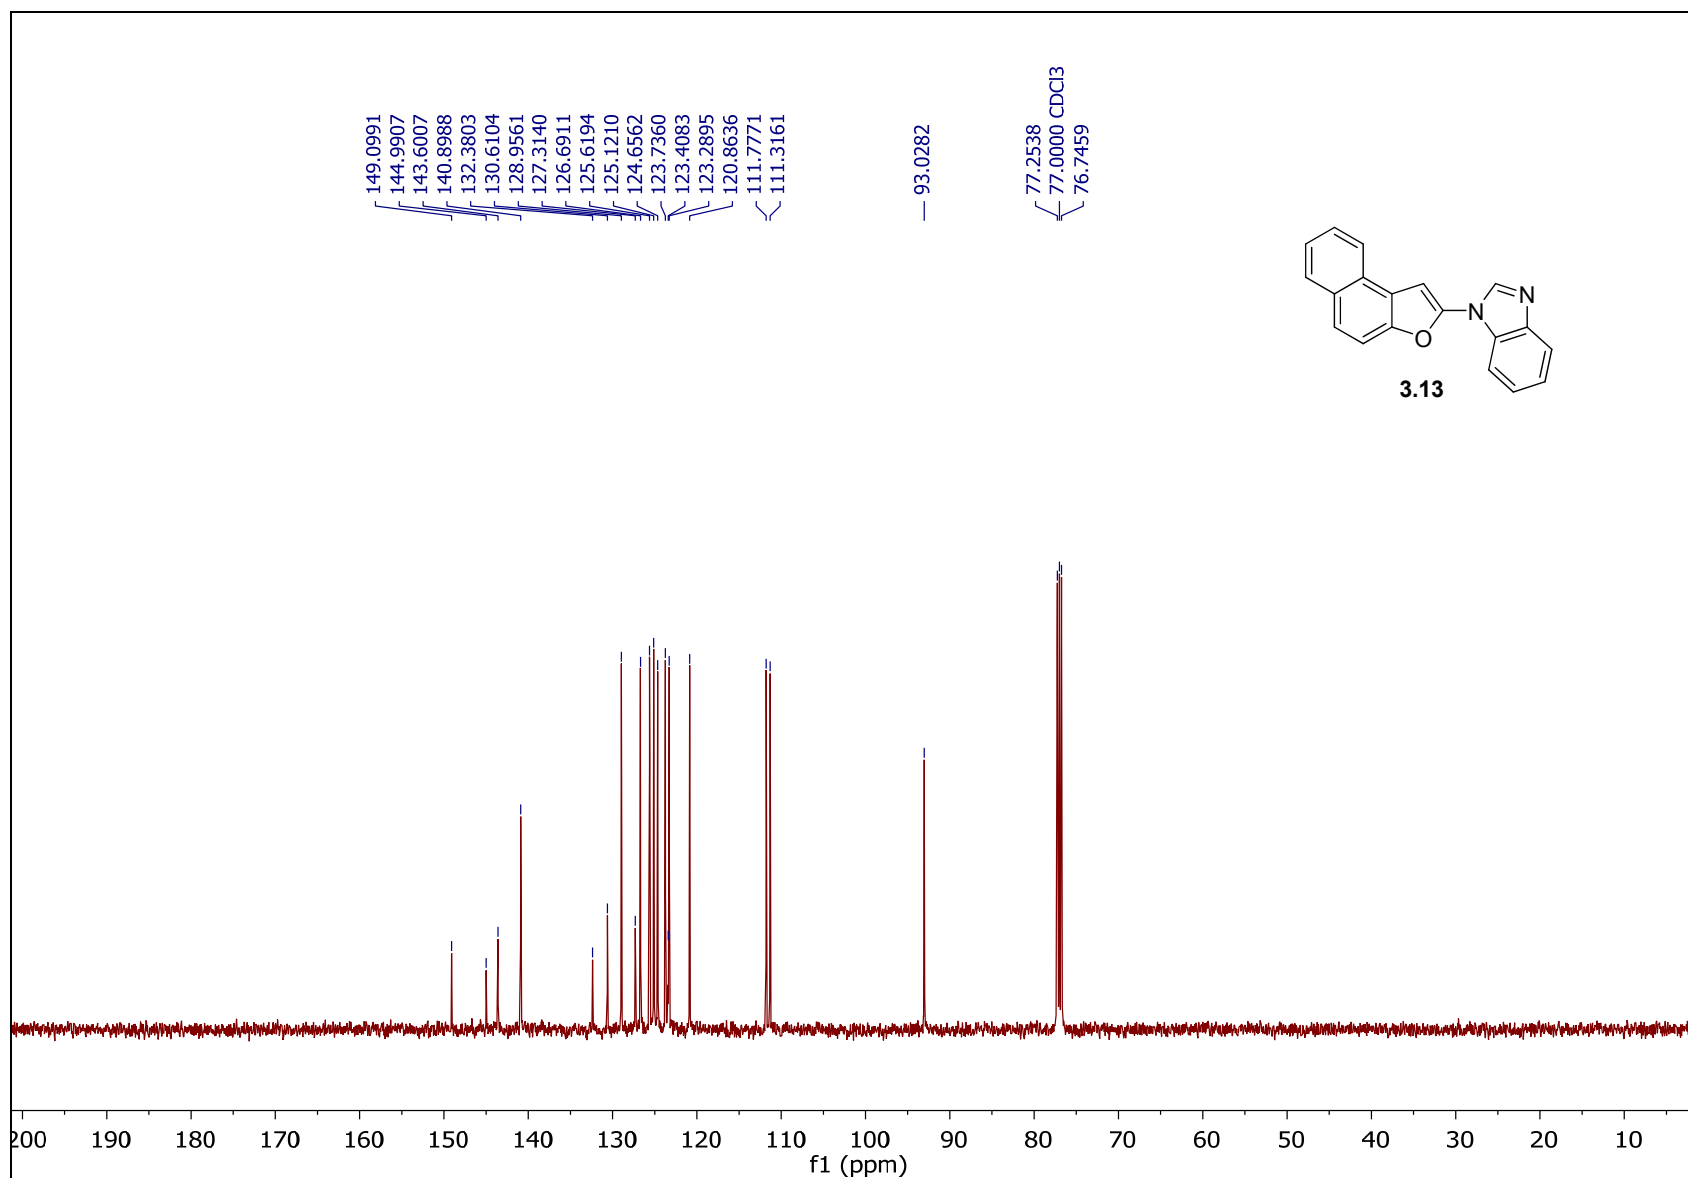

$^{13}\text{C}$  NMR (125 MHz,  $\text{CDCl}_3$ ) spectrum of **3.13**

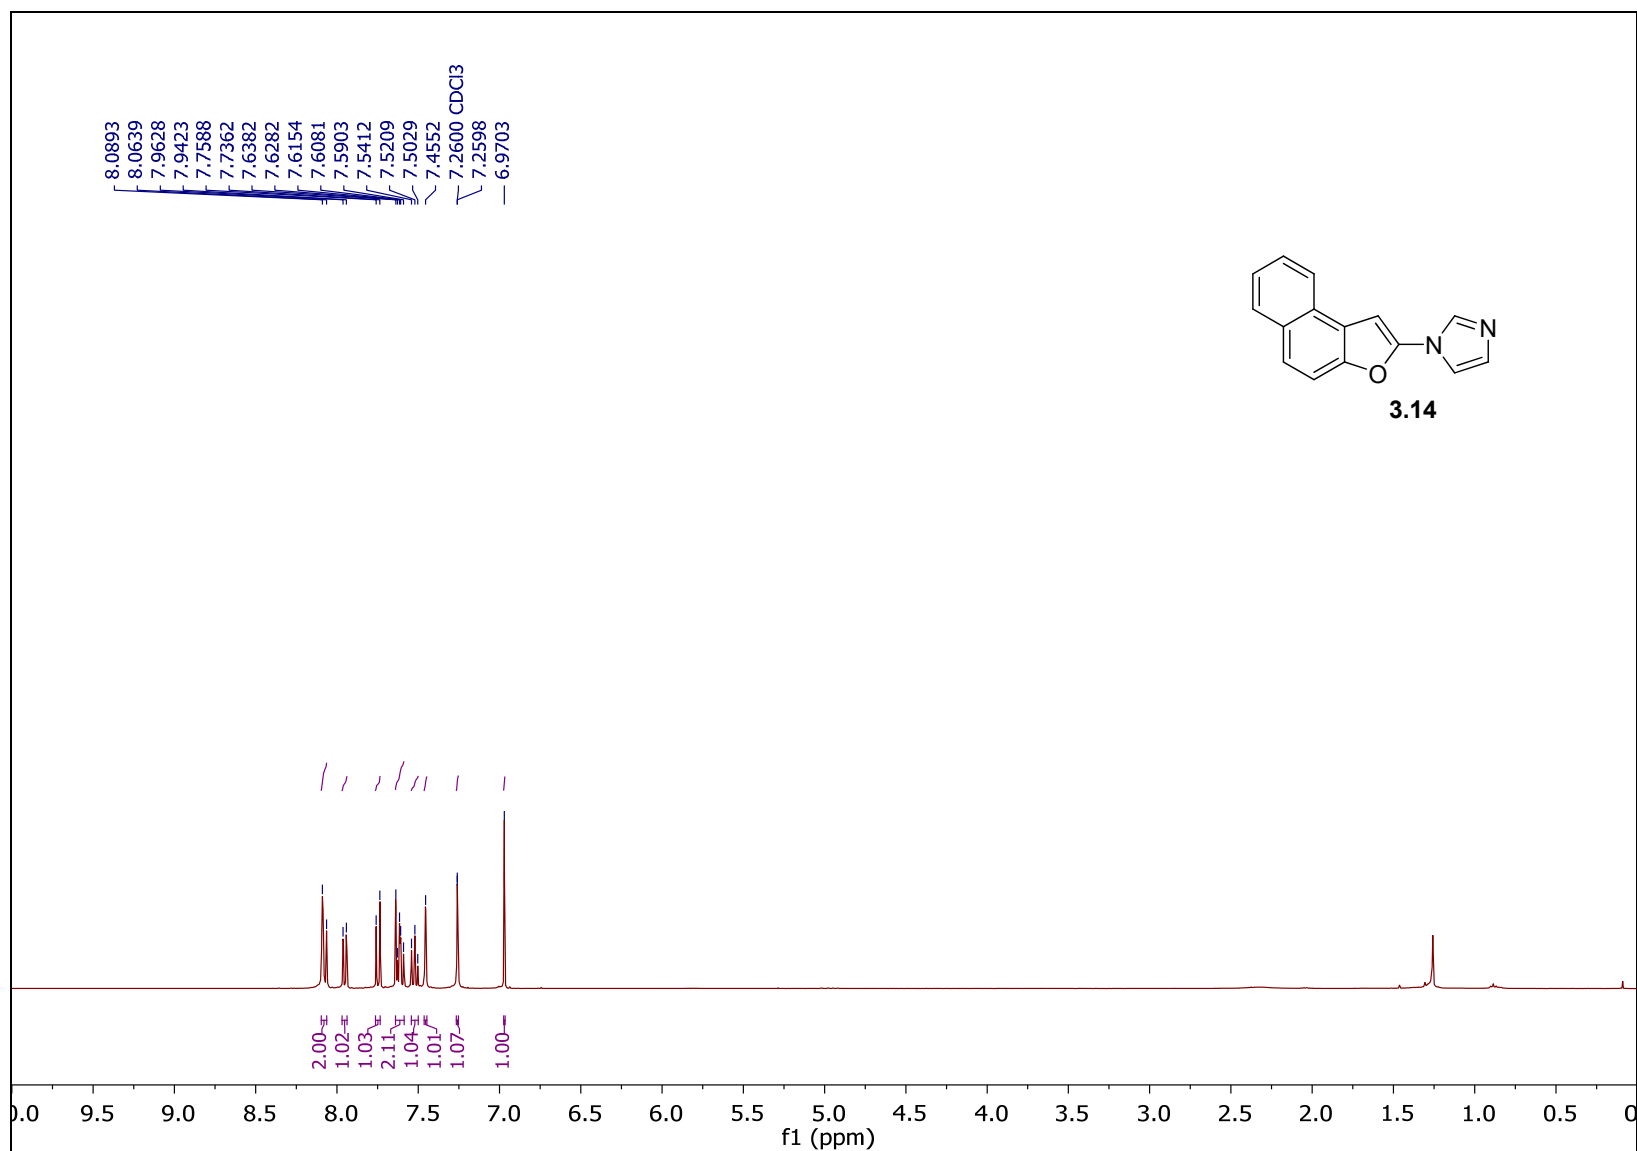

<sup>1</sup>H NMR (400 MHz, CDCl<sub>3</sub>) spectrum of **3.14**

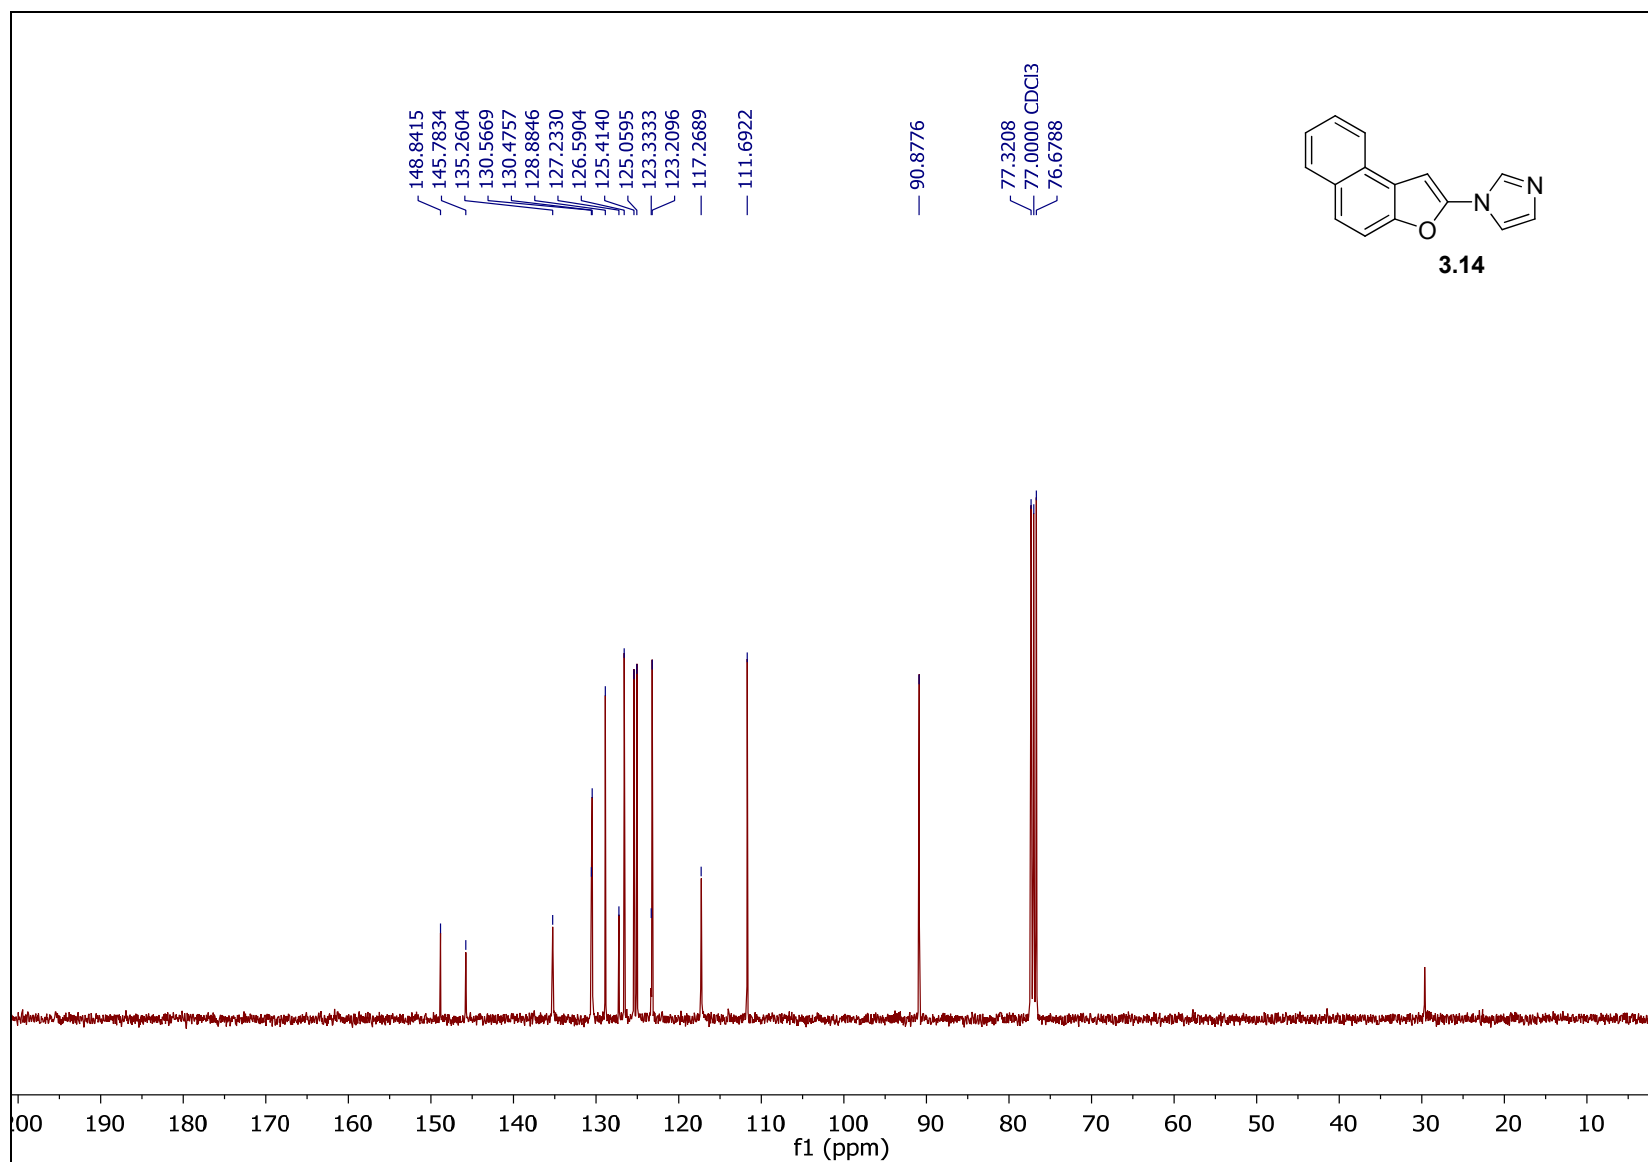

$^{13}\text{C}$  NMR (100 MHz,  $\text{CDCl}_3$ ) spectrum of **3.14**

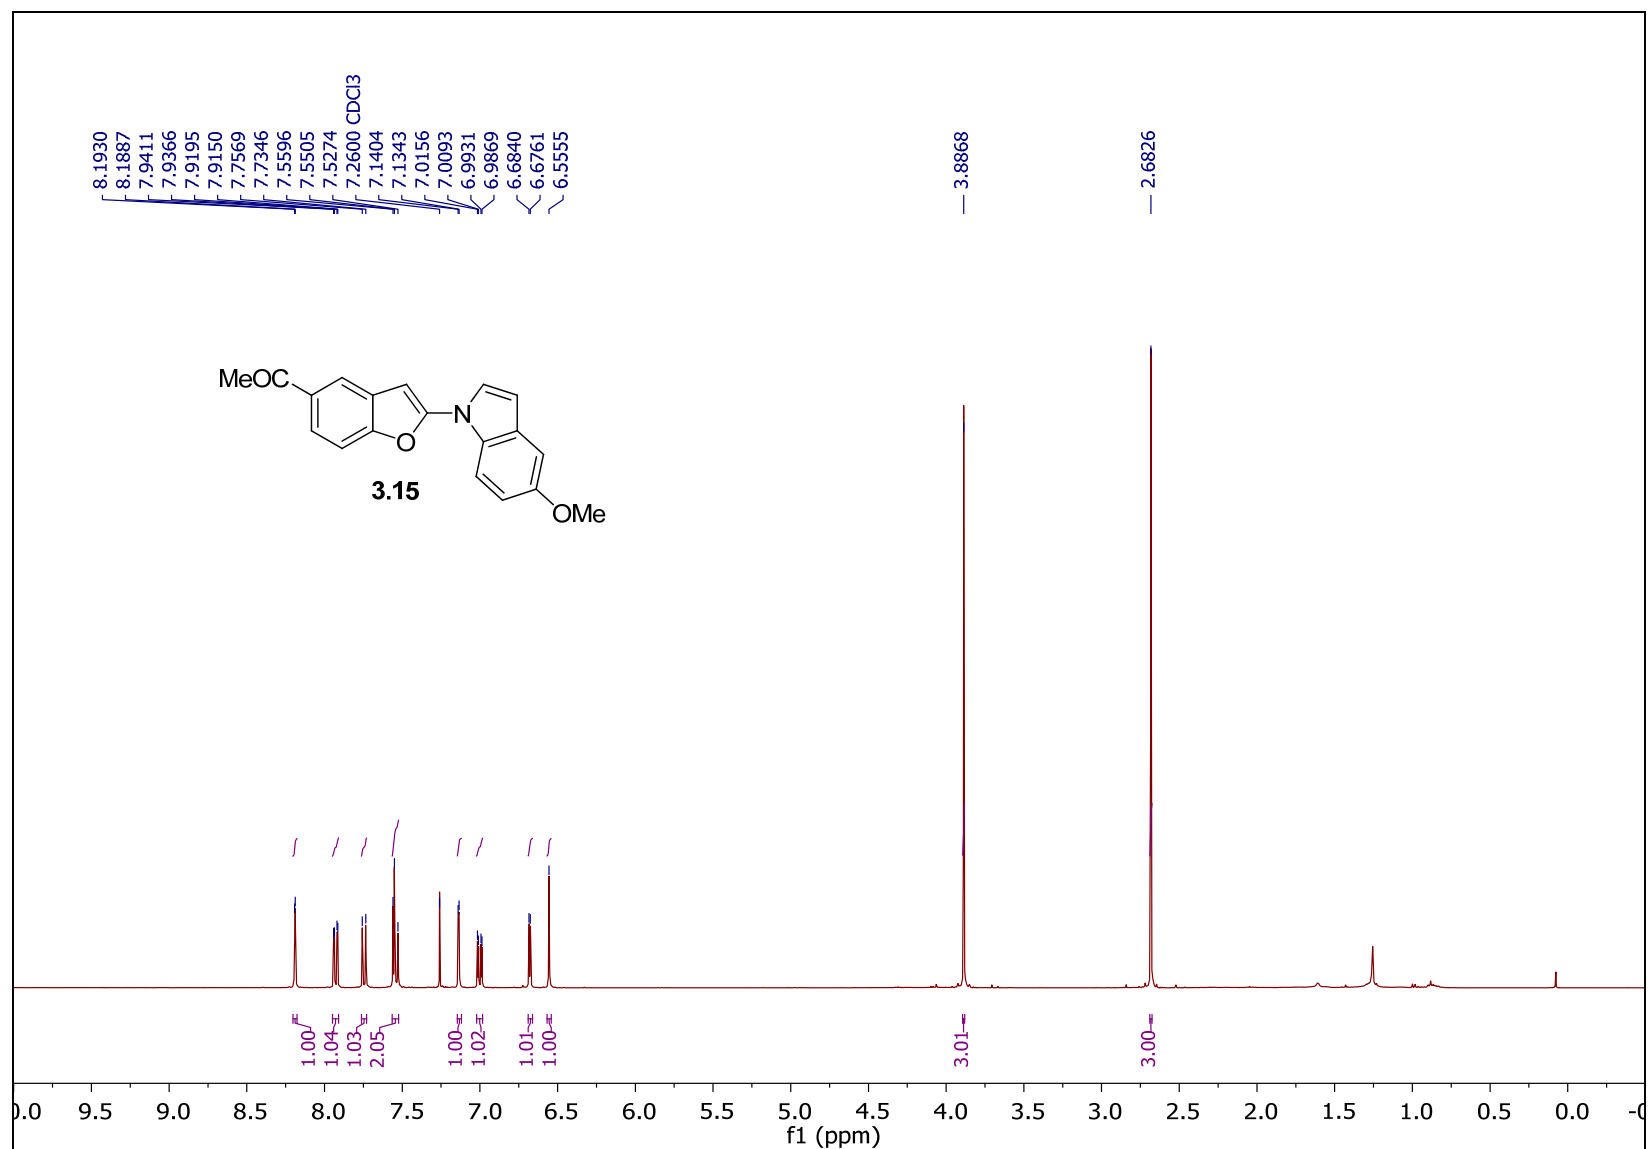

<sup>1</sup>H NMR (400 MHz, CDCl<sub>3</sub>) spectrum of **3.15**

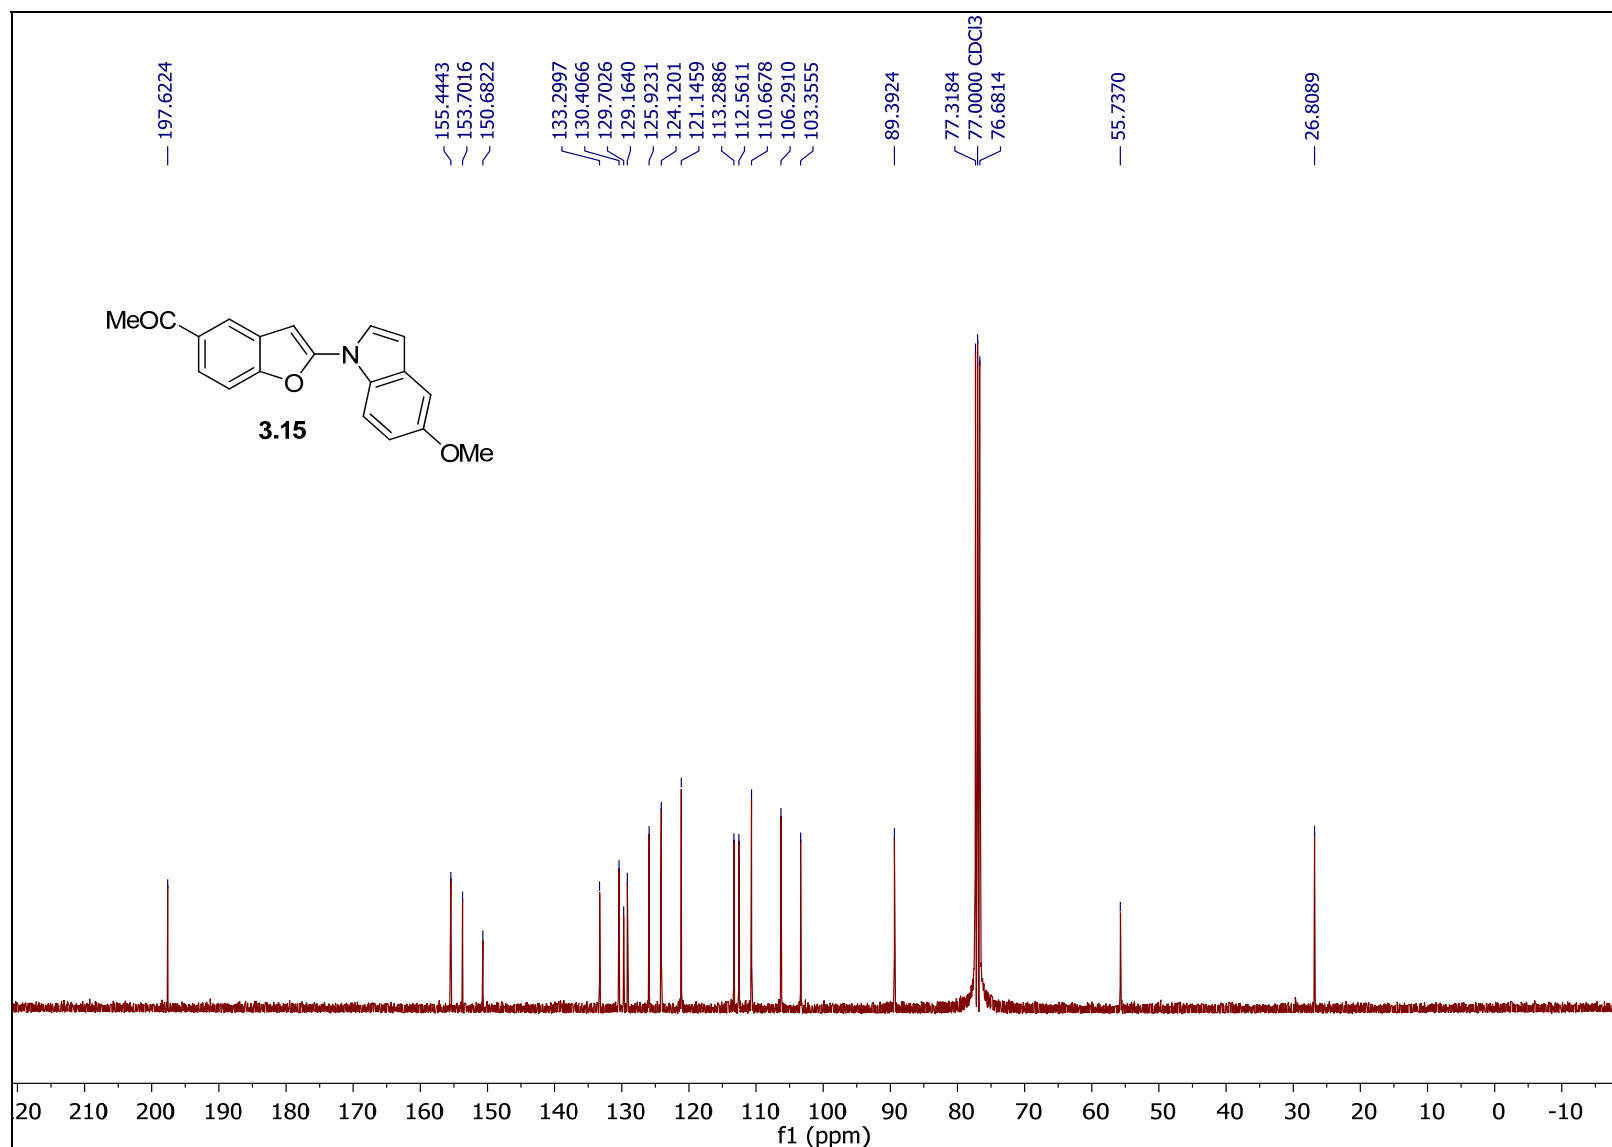

$^{13}\text{C}$  NMR (100 MHz,  $\text{CDCl}_3$ ) spectrum of **3.15**



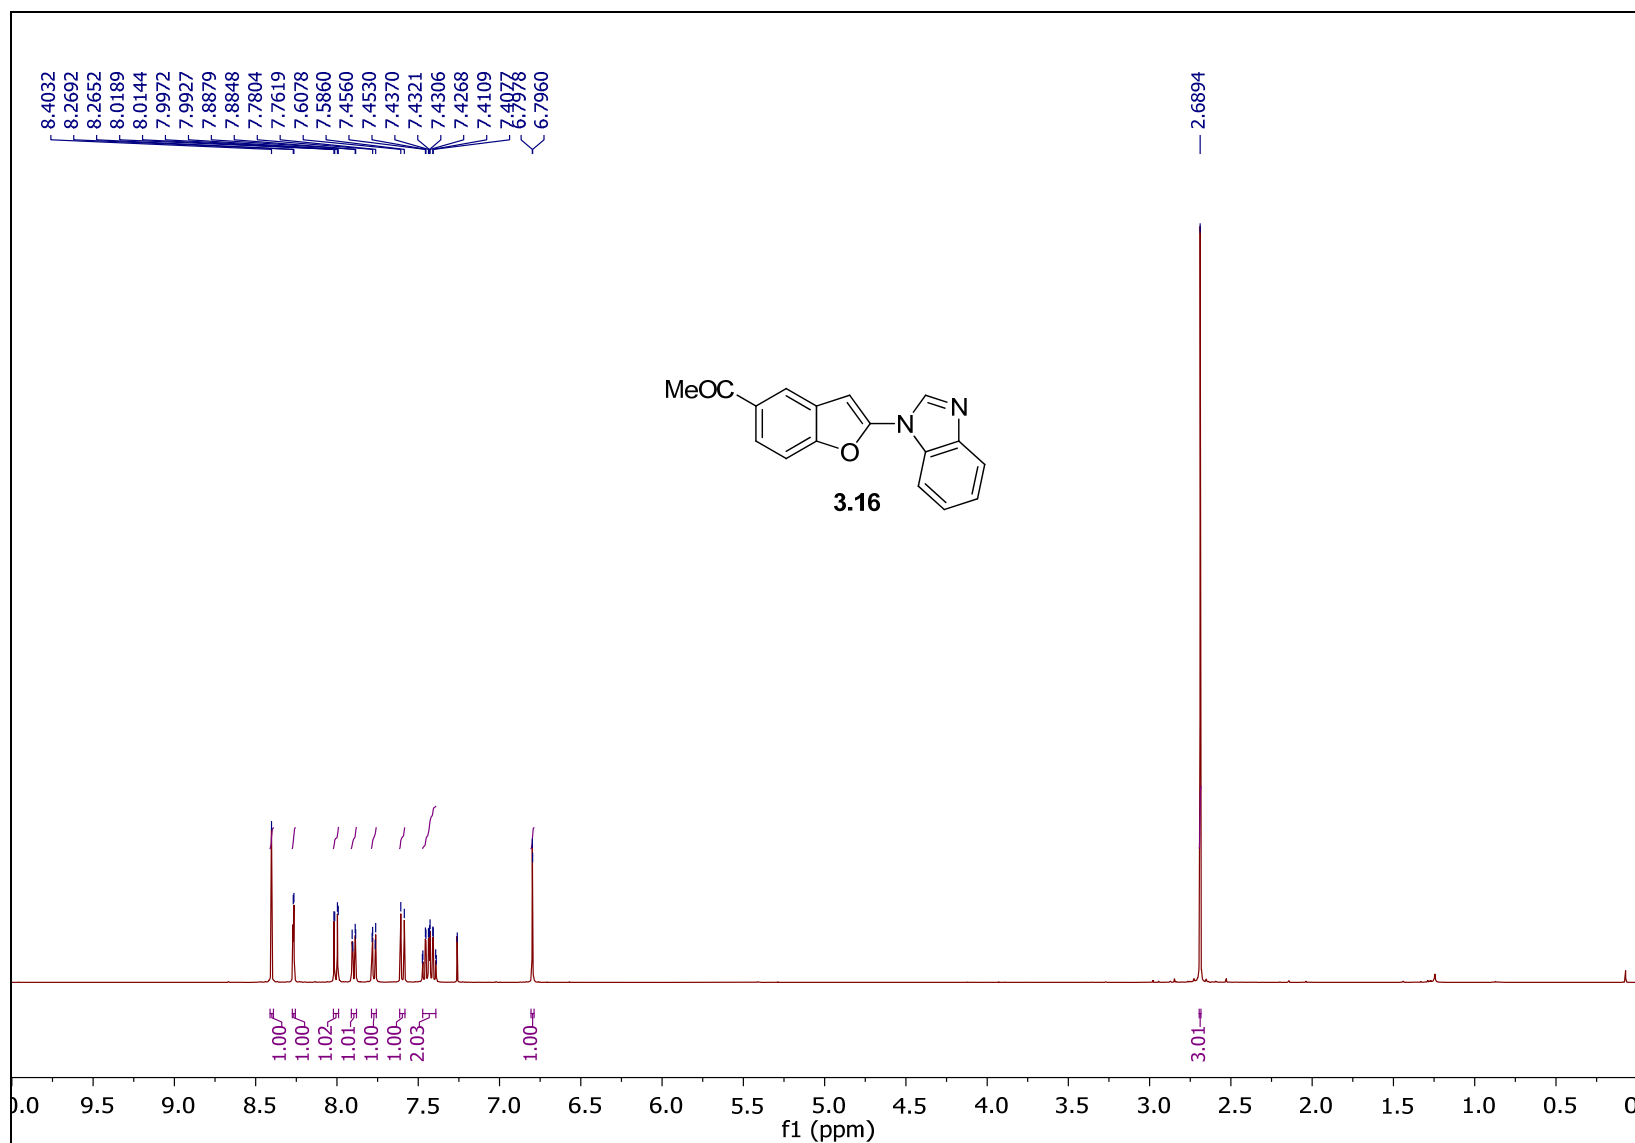

$^1\text{H}$  NMR (400 MHz,  $\text{CDCl}_3$ ) spectrum of **3.16**

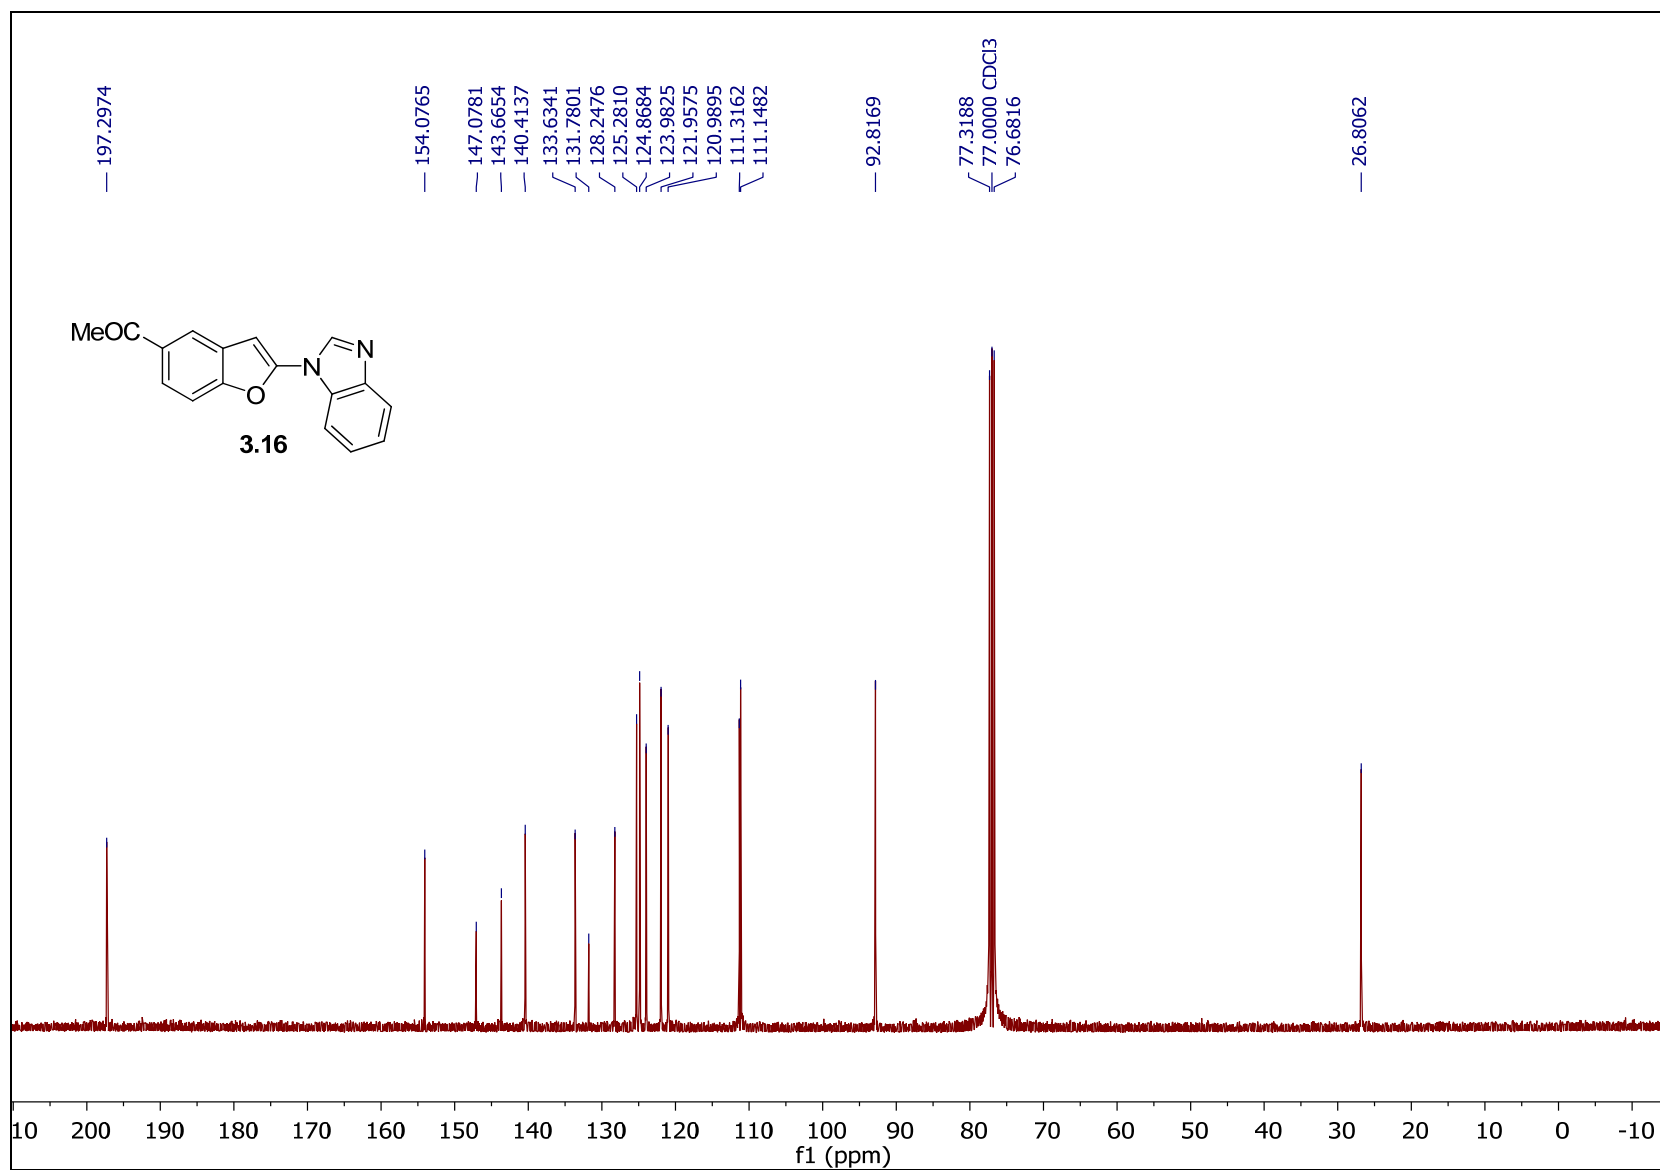

<sup>13</sup>C NMR (100 MHz, CDCl<sub>3</sub>) spectrum of **3.16**

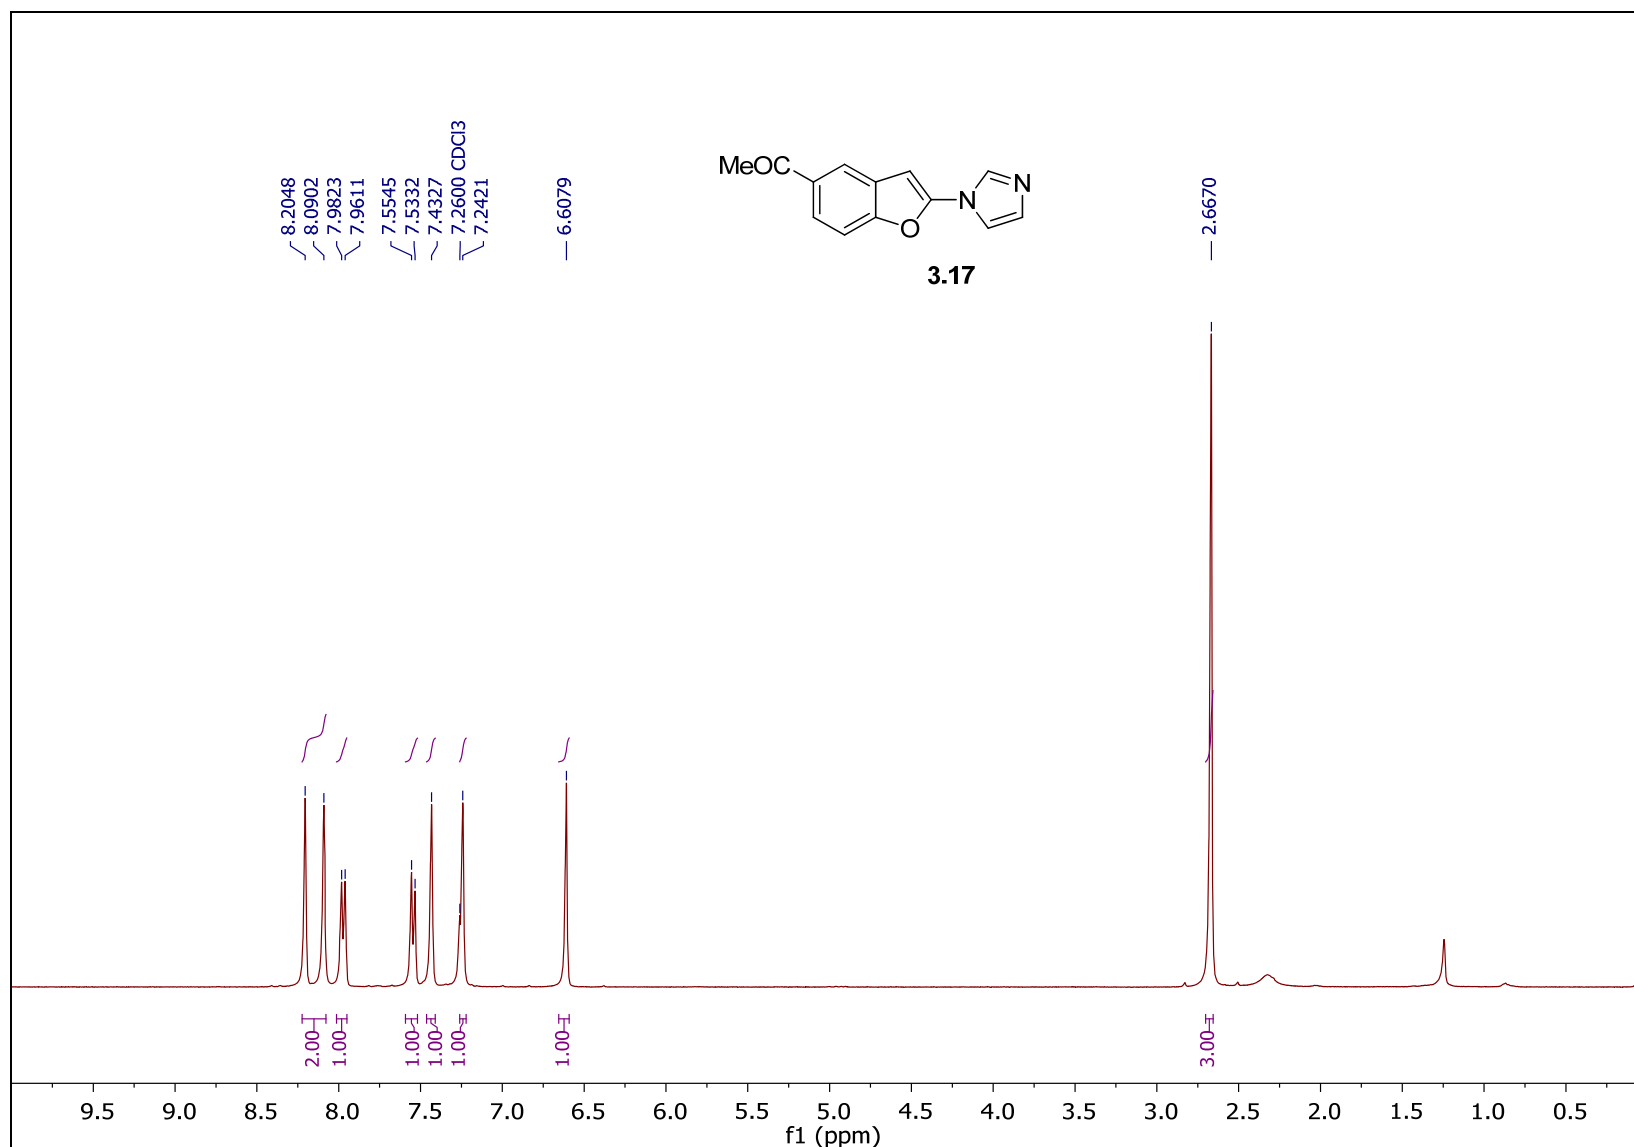

<sup>1</sup>H NMR (400 MHz, CDCl<sub>3</sub>) spectrum of **3.17**

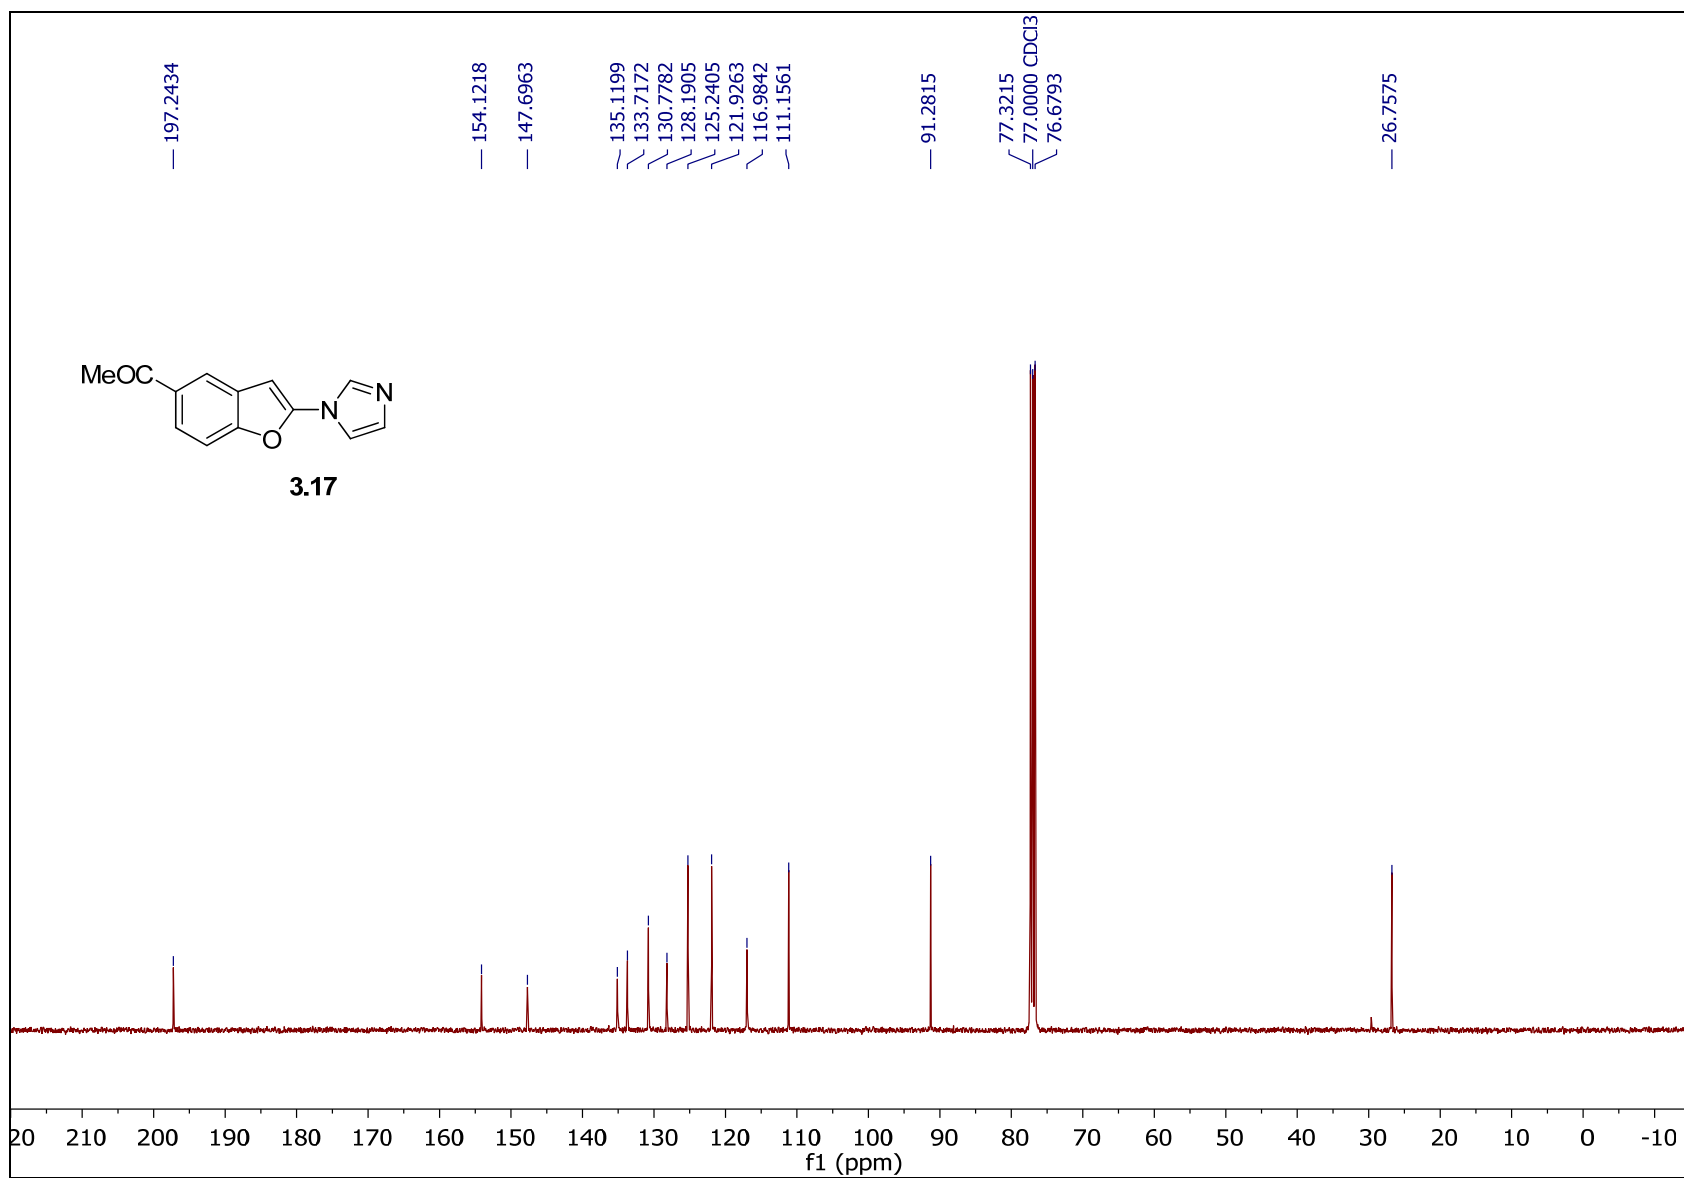

<sup>13</sup>C NMR (100 MHz, CDCl<sub>3</sub>) spectrum of **3.17**

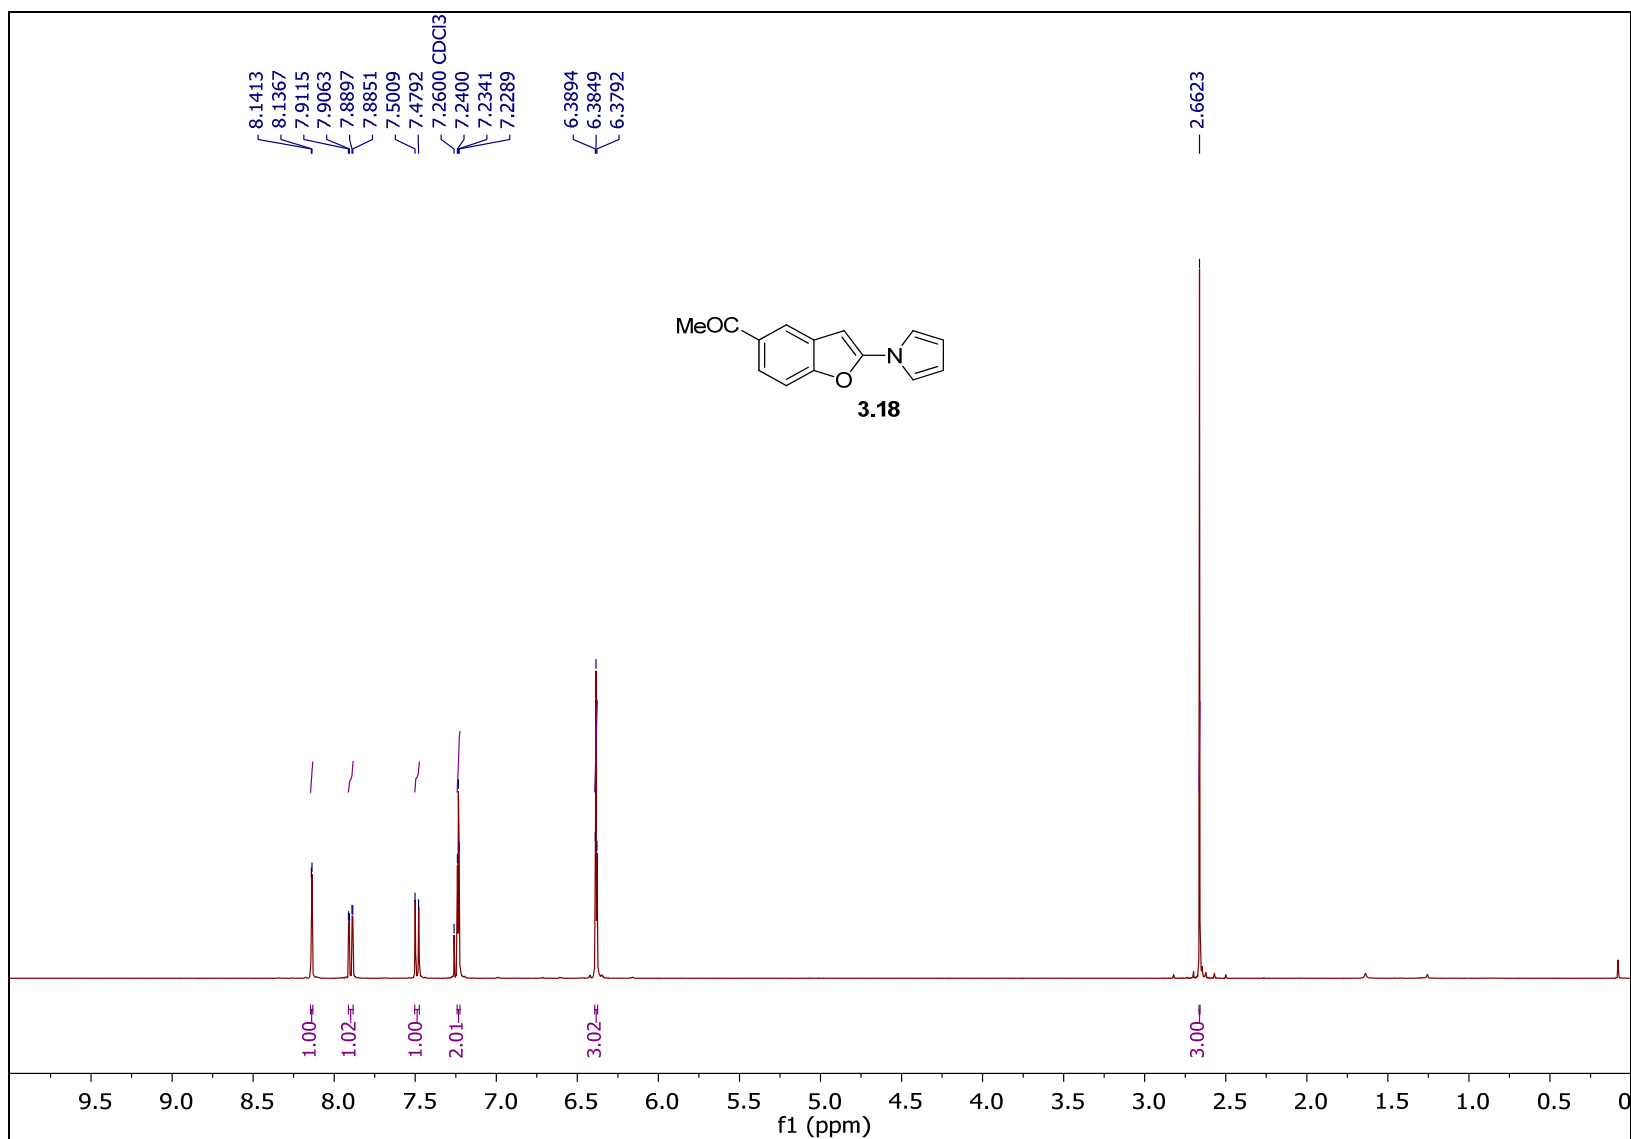

<sup>1</sup>H NMR (400 MHz, CDCl<sub>3</sub>) spectrum of **3.18**

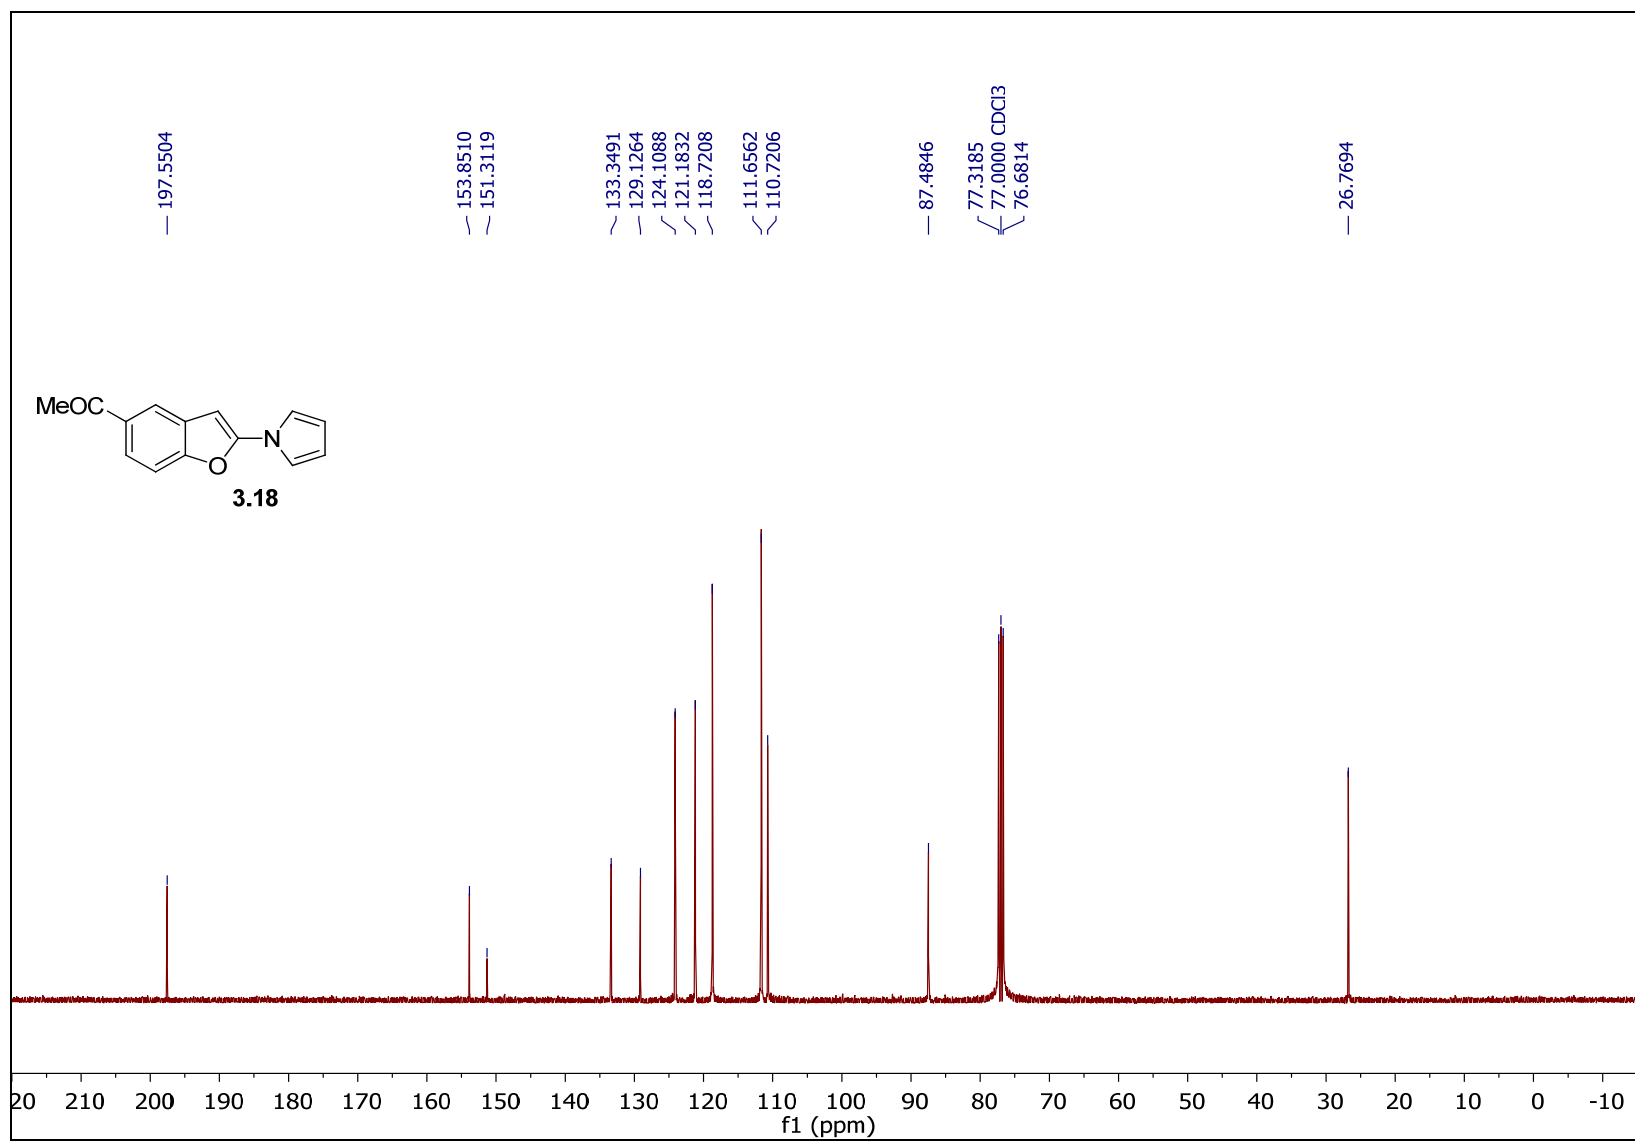

$^{13}\text{C}$  NMR (100 MHz,  $\text{CDCl}_3$ ) spectrum of **3.18**

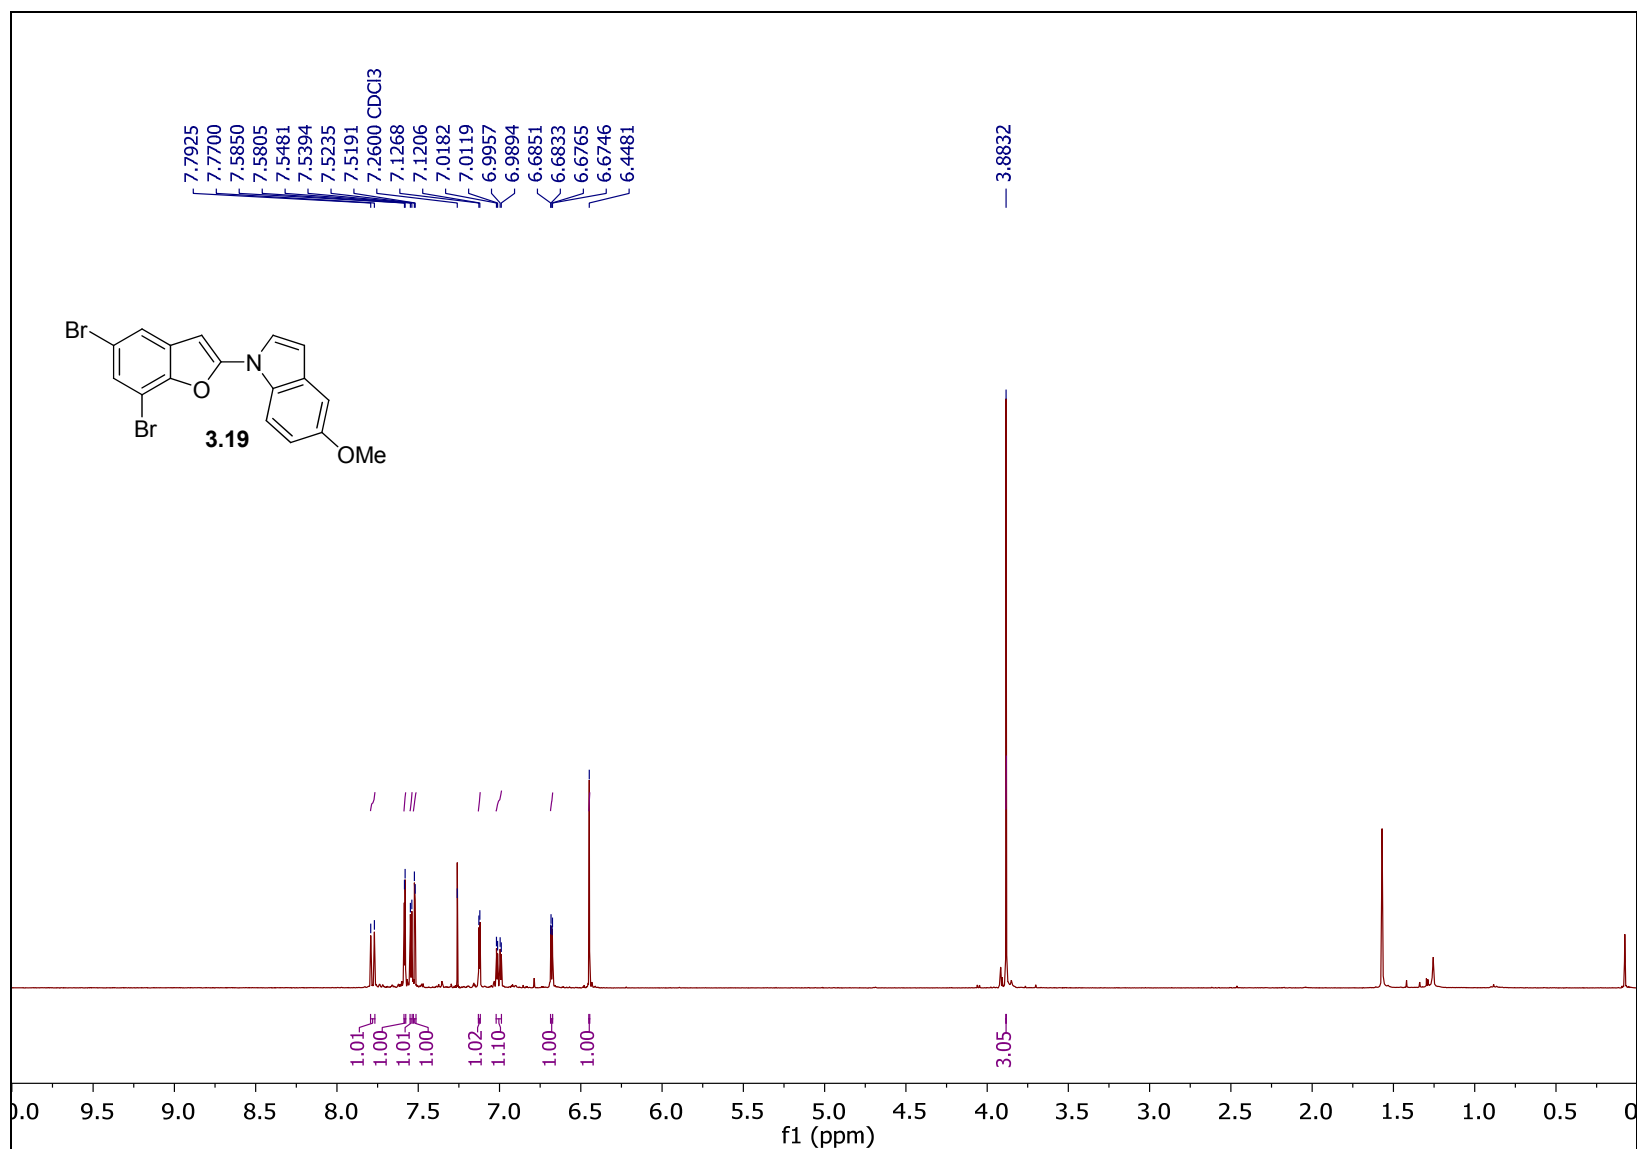

<sup>1</sup>H NMR (400 MHz, CDCl<sub>3</sub>) spectrum of **3.19**

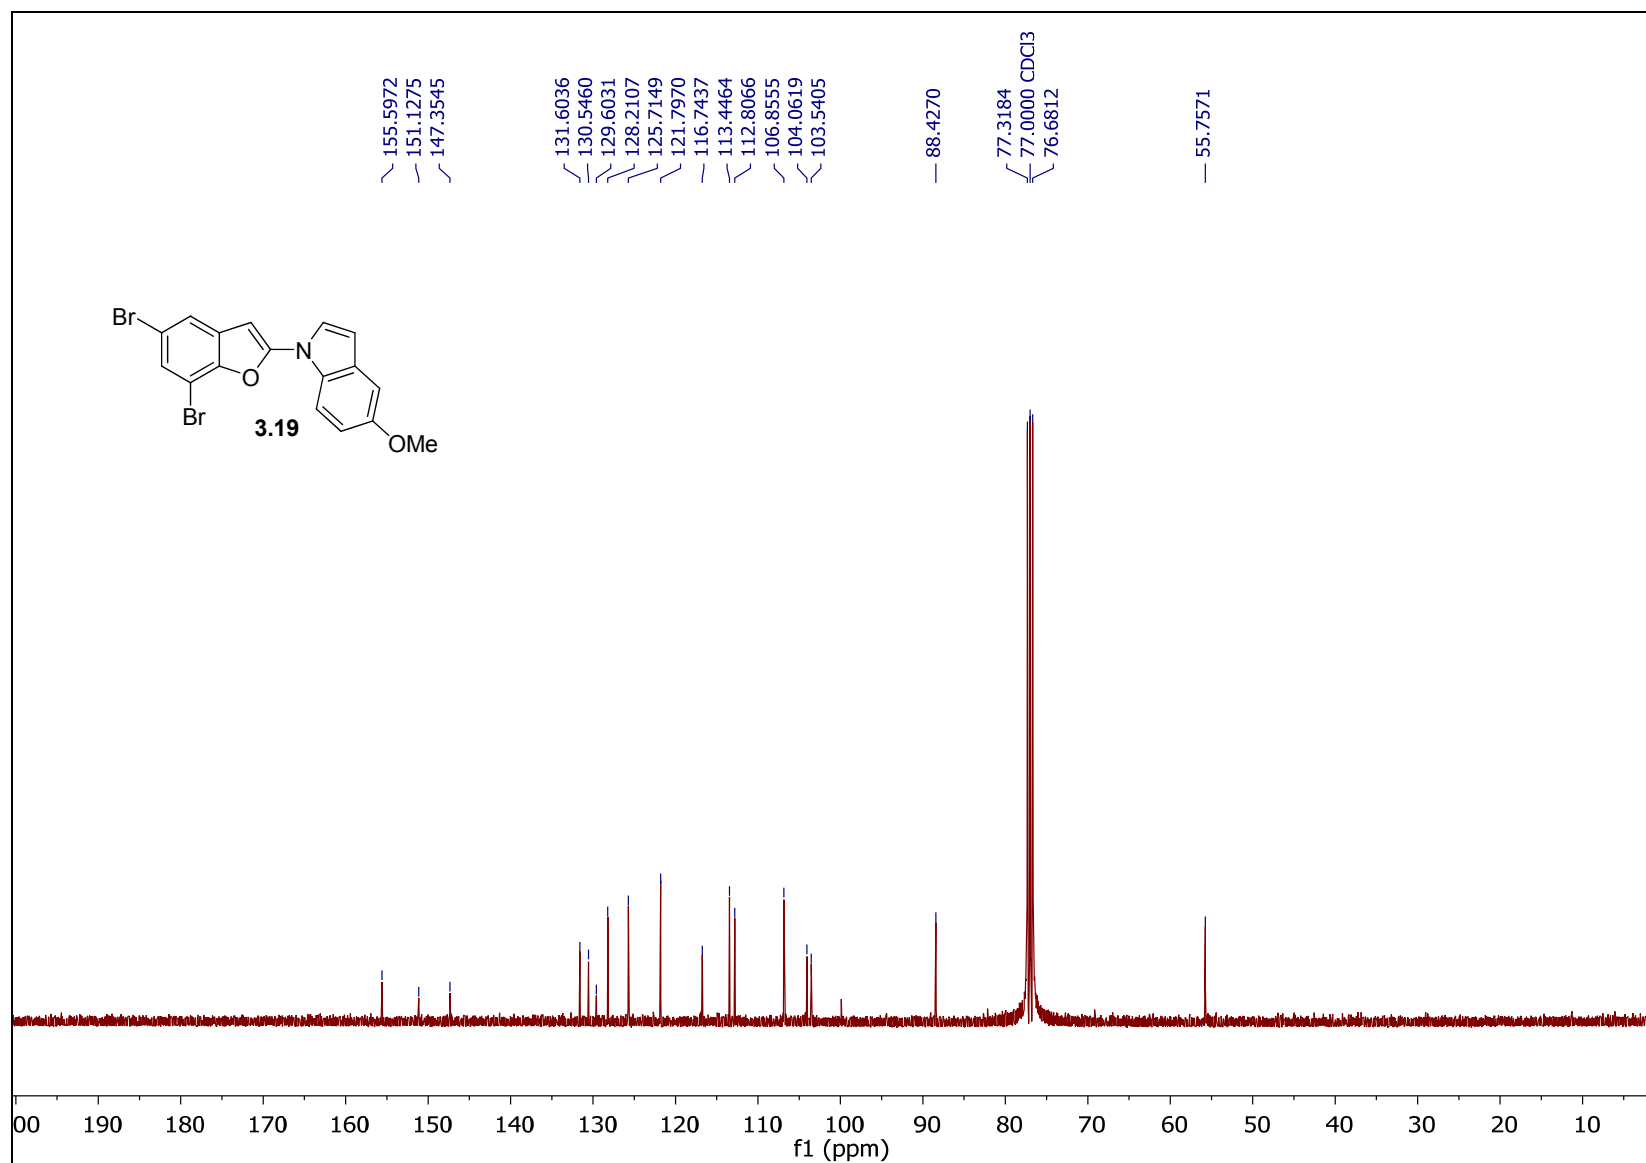

$^{13}\text{C}$  NMR (100 MHz,  $\text{CDCl}_3$ ) spectrum of **3.19**



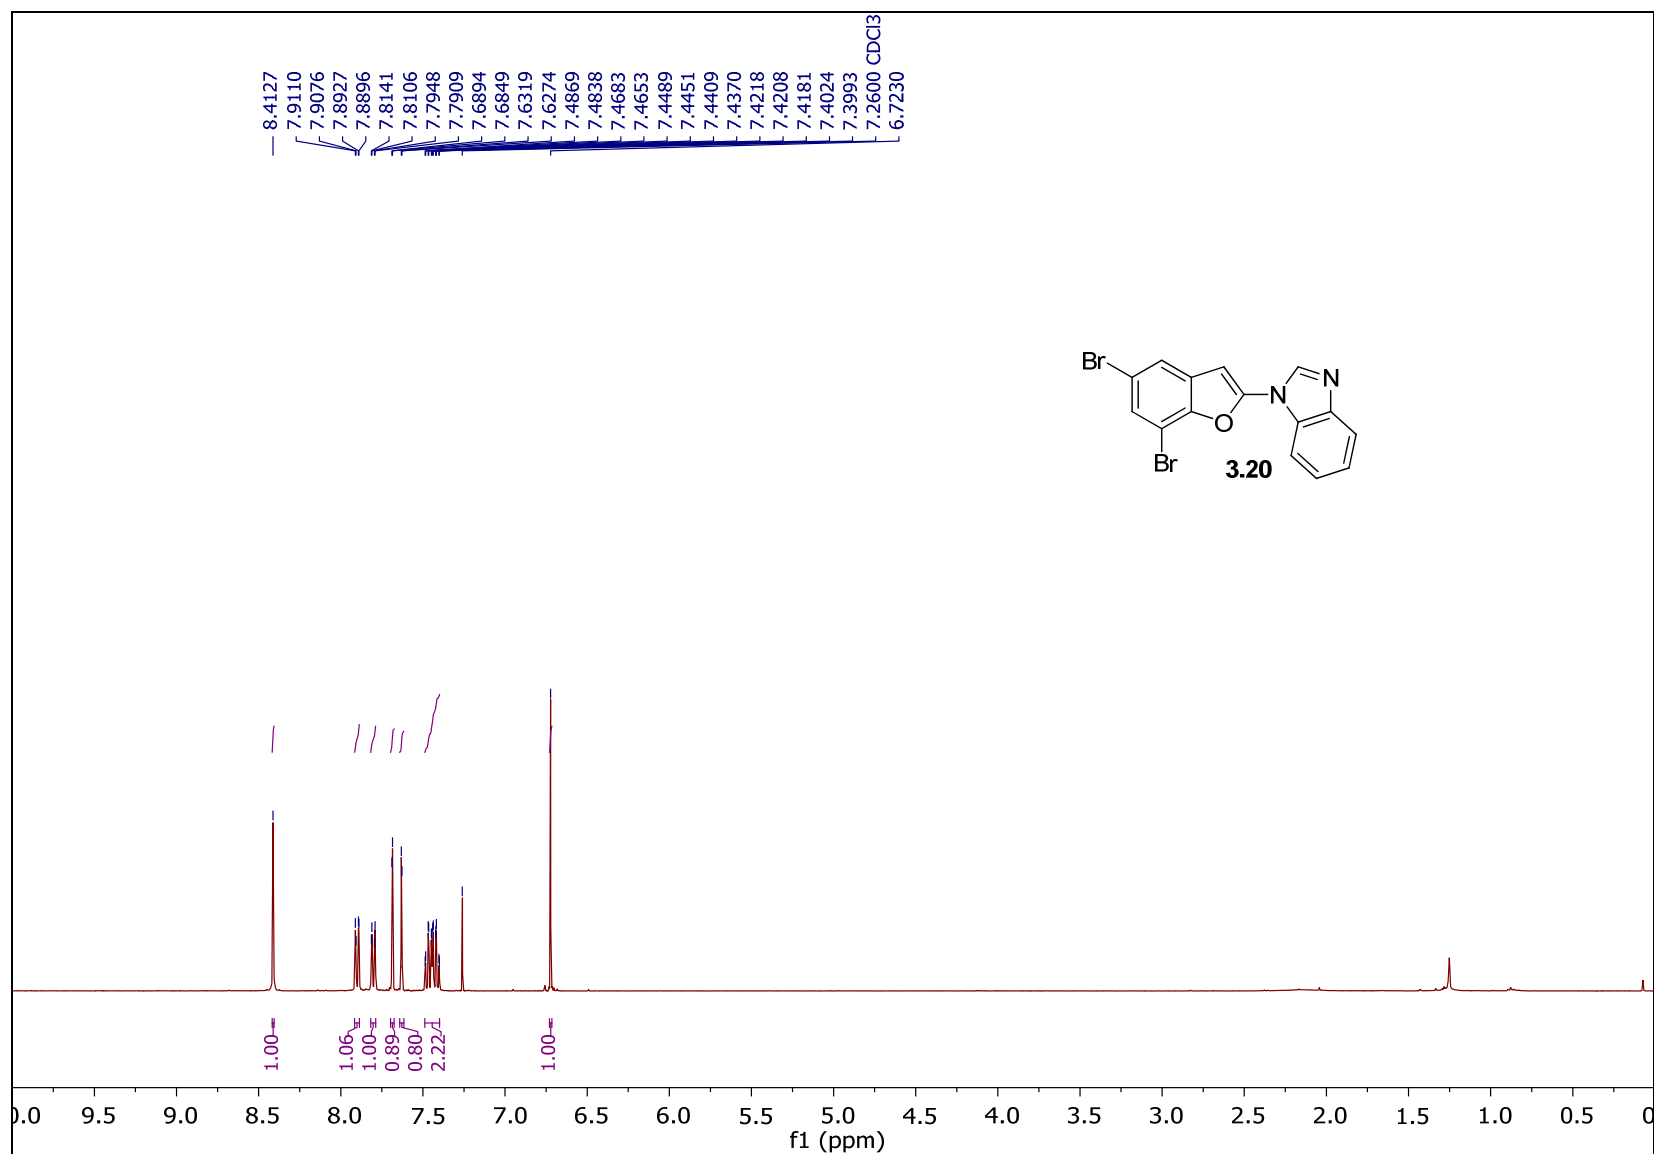

<sup>1</sup>H NMR (400 MHz, CDCl<sub>3</sub>) spectrum of **3.20**

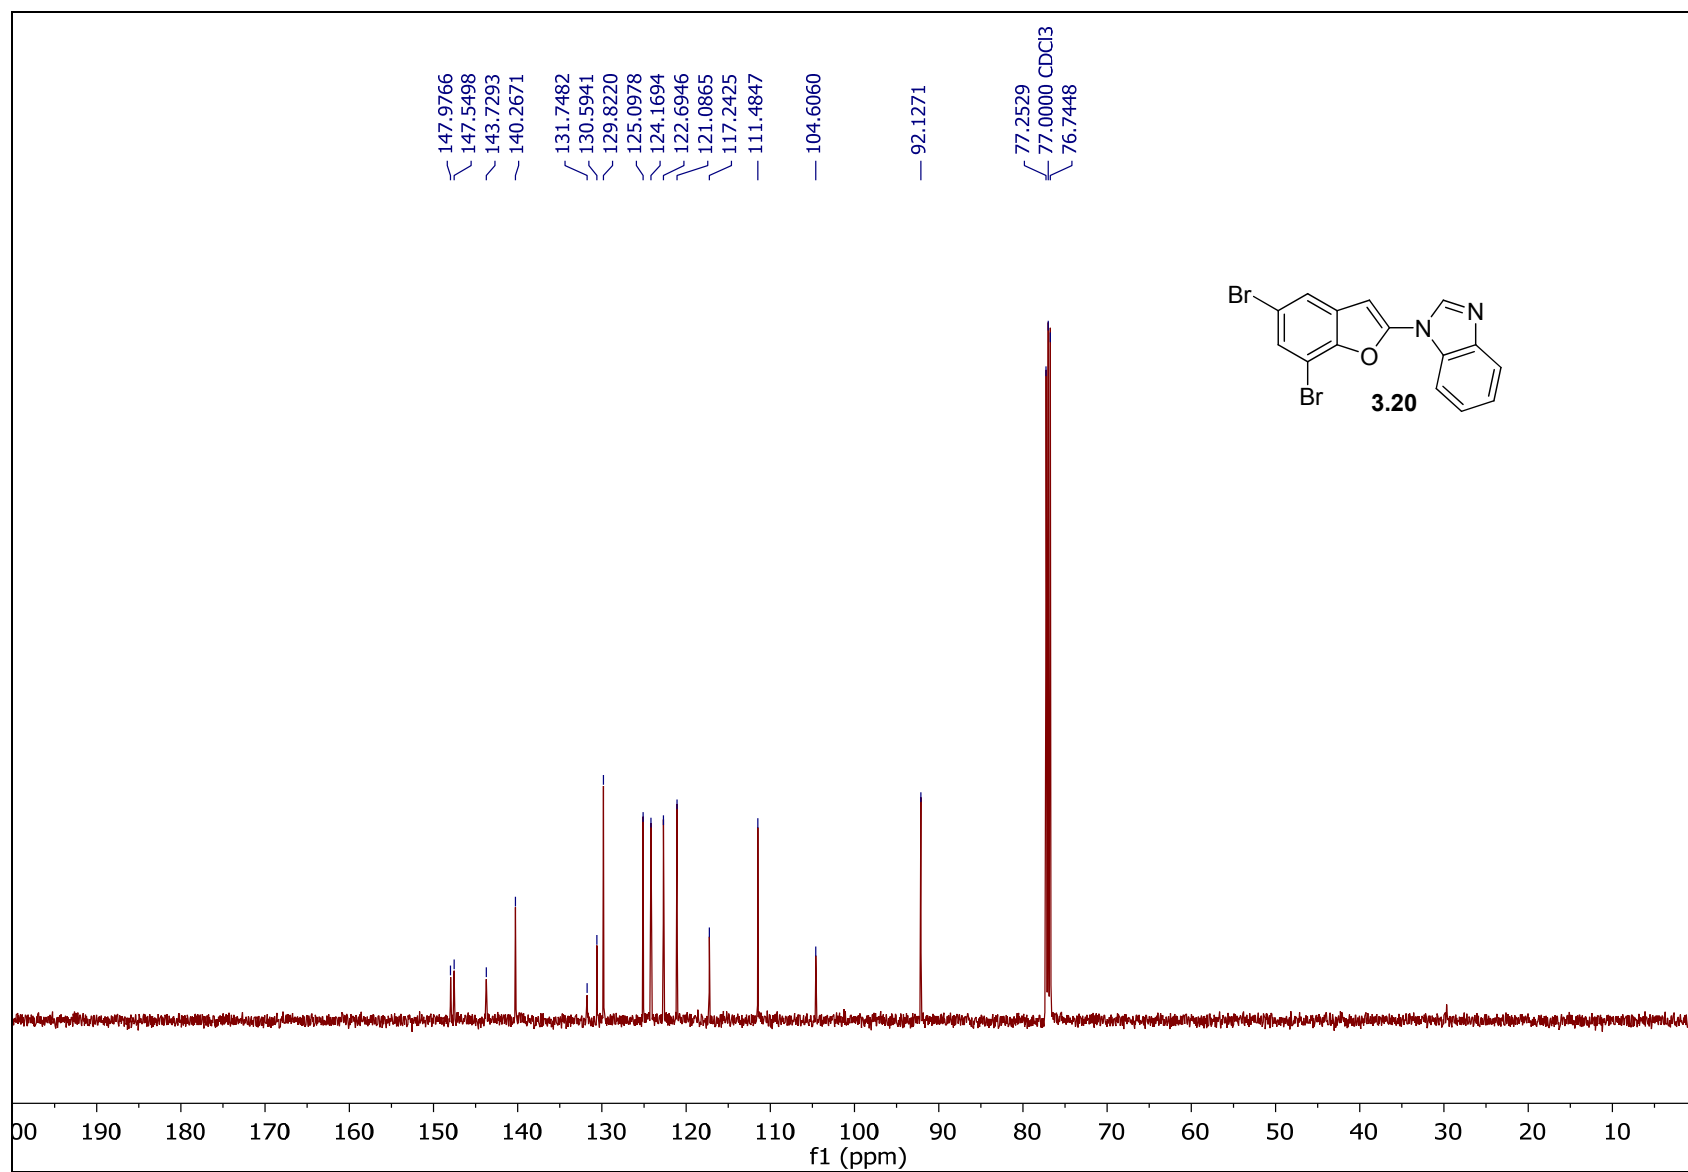

$^{13}\text{C}$  NMR (125 MHz,  $\text{CDCl}_3$ ) spectrum of **3.20**

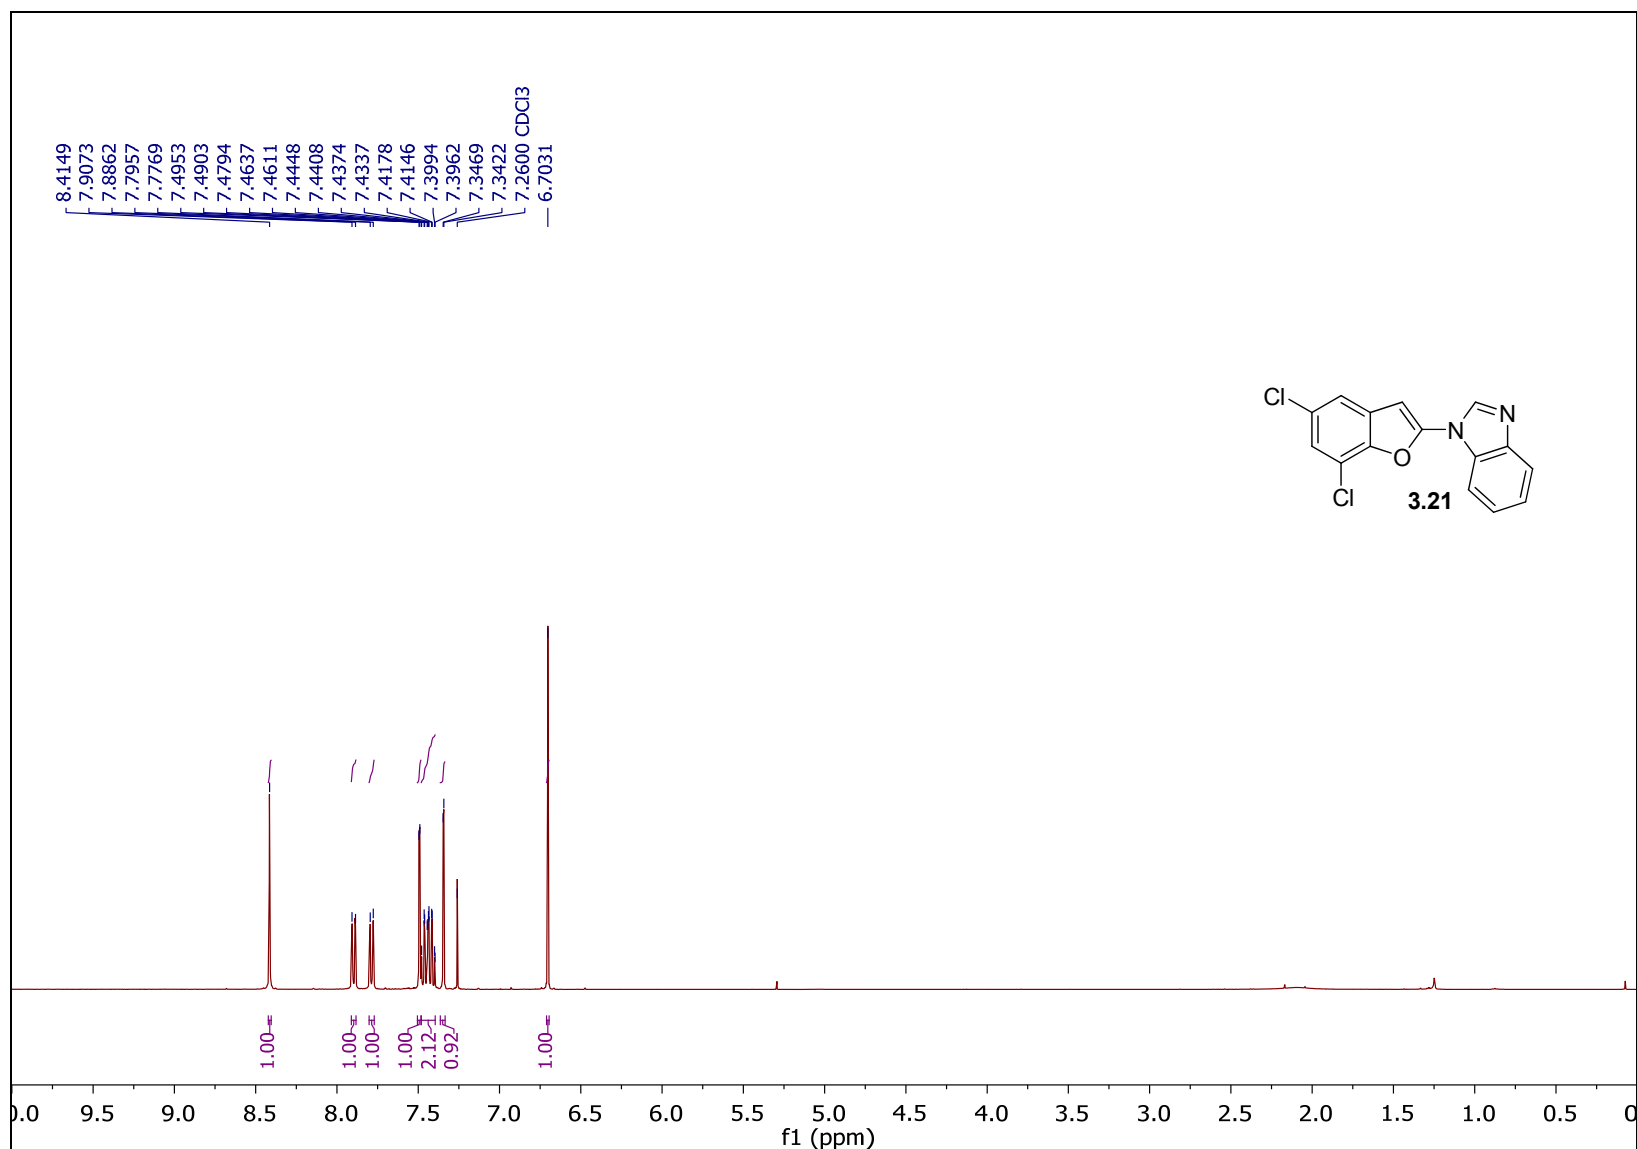

<sup>1</sup>H NMR (400 MHz, CDCl<sub>3</sub>) spectrum of **3.21**

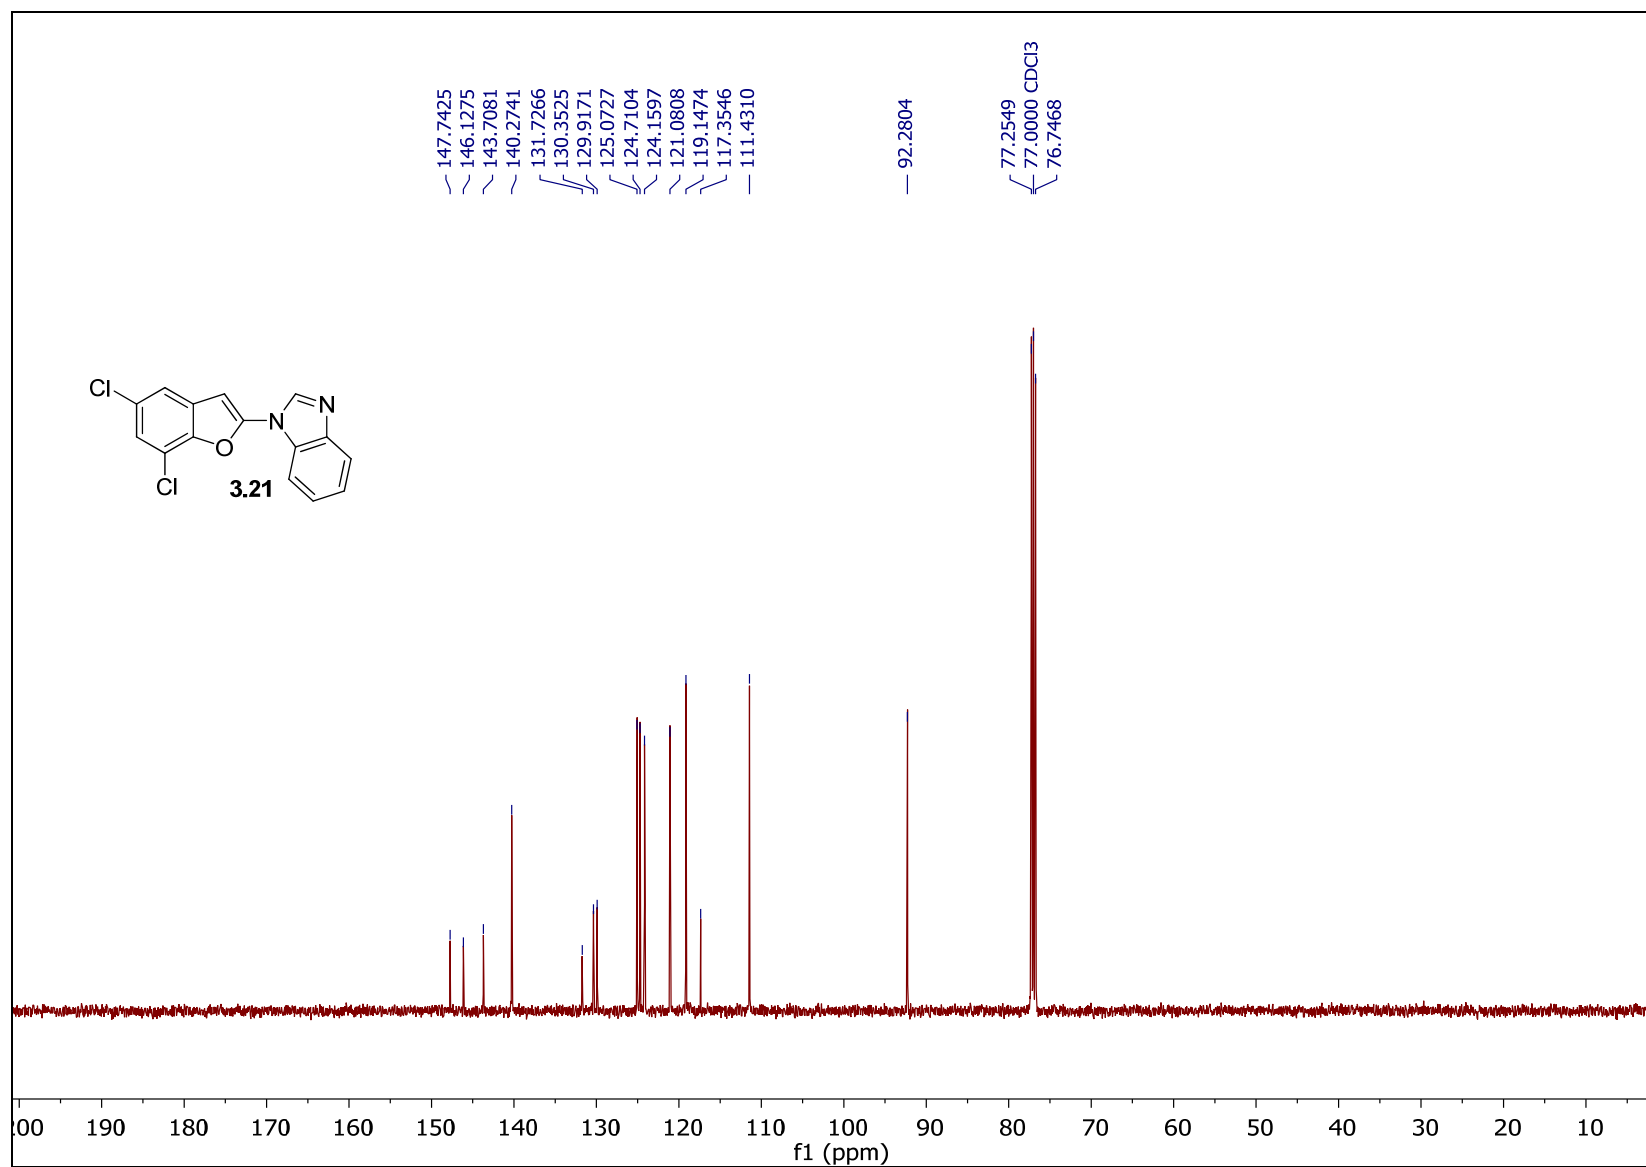

<sup>13</sup>C NMR (125 MHz, CDCl<sub>3</sub>) spectrum of **3.21**

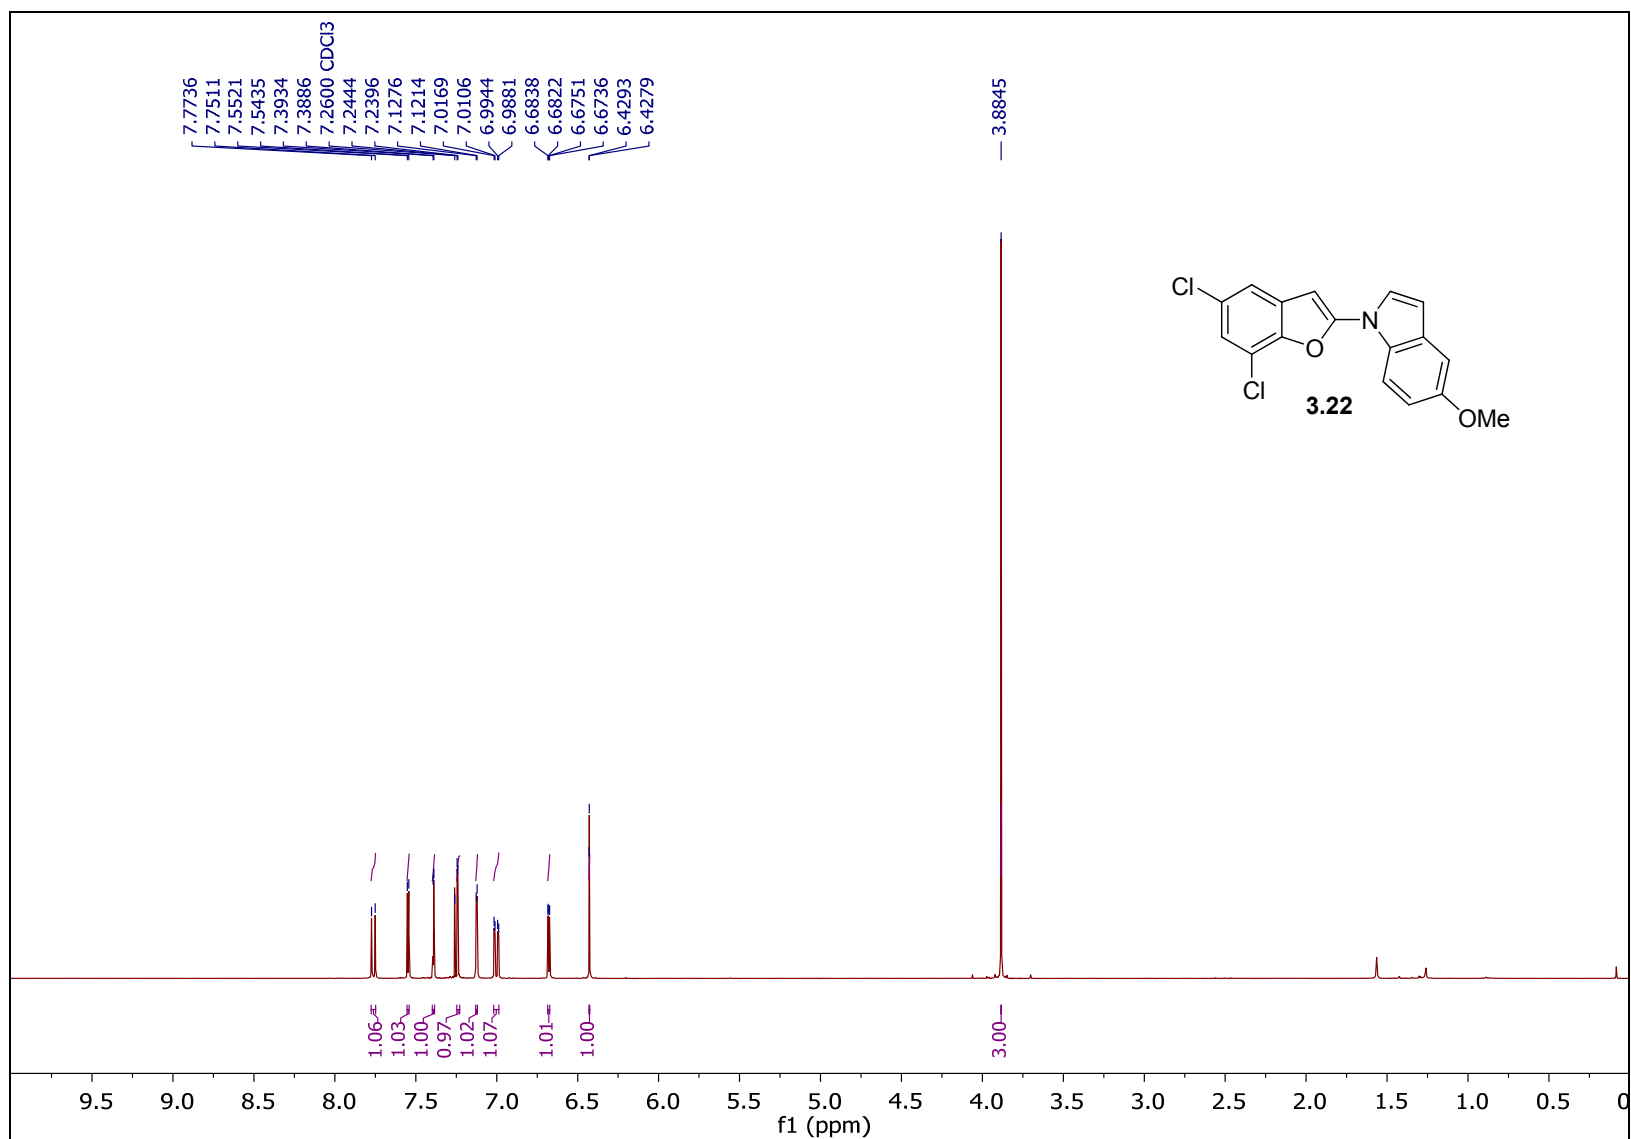

<sup>1</sup>H NMR (400 MHz, CDCl<sub>3</sub>) spectrum of **3.22**

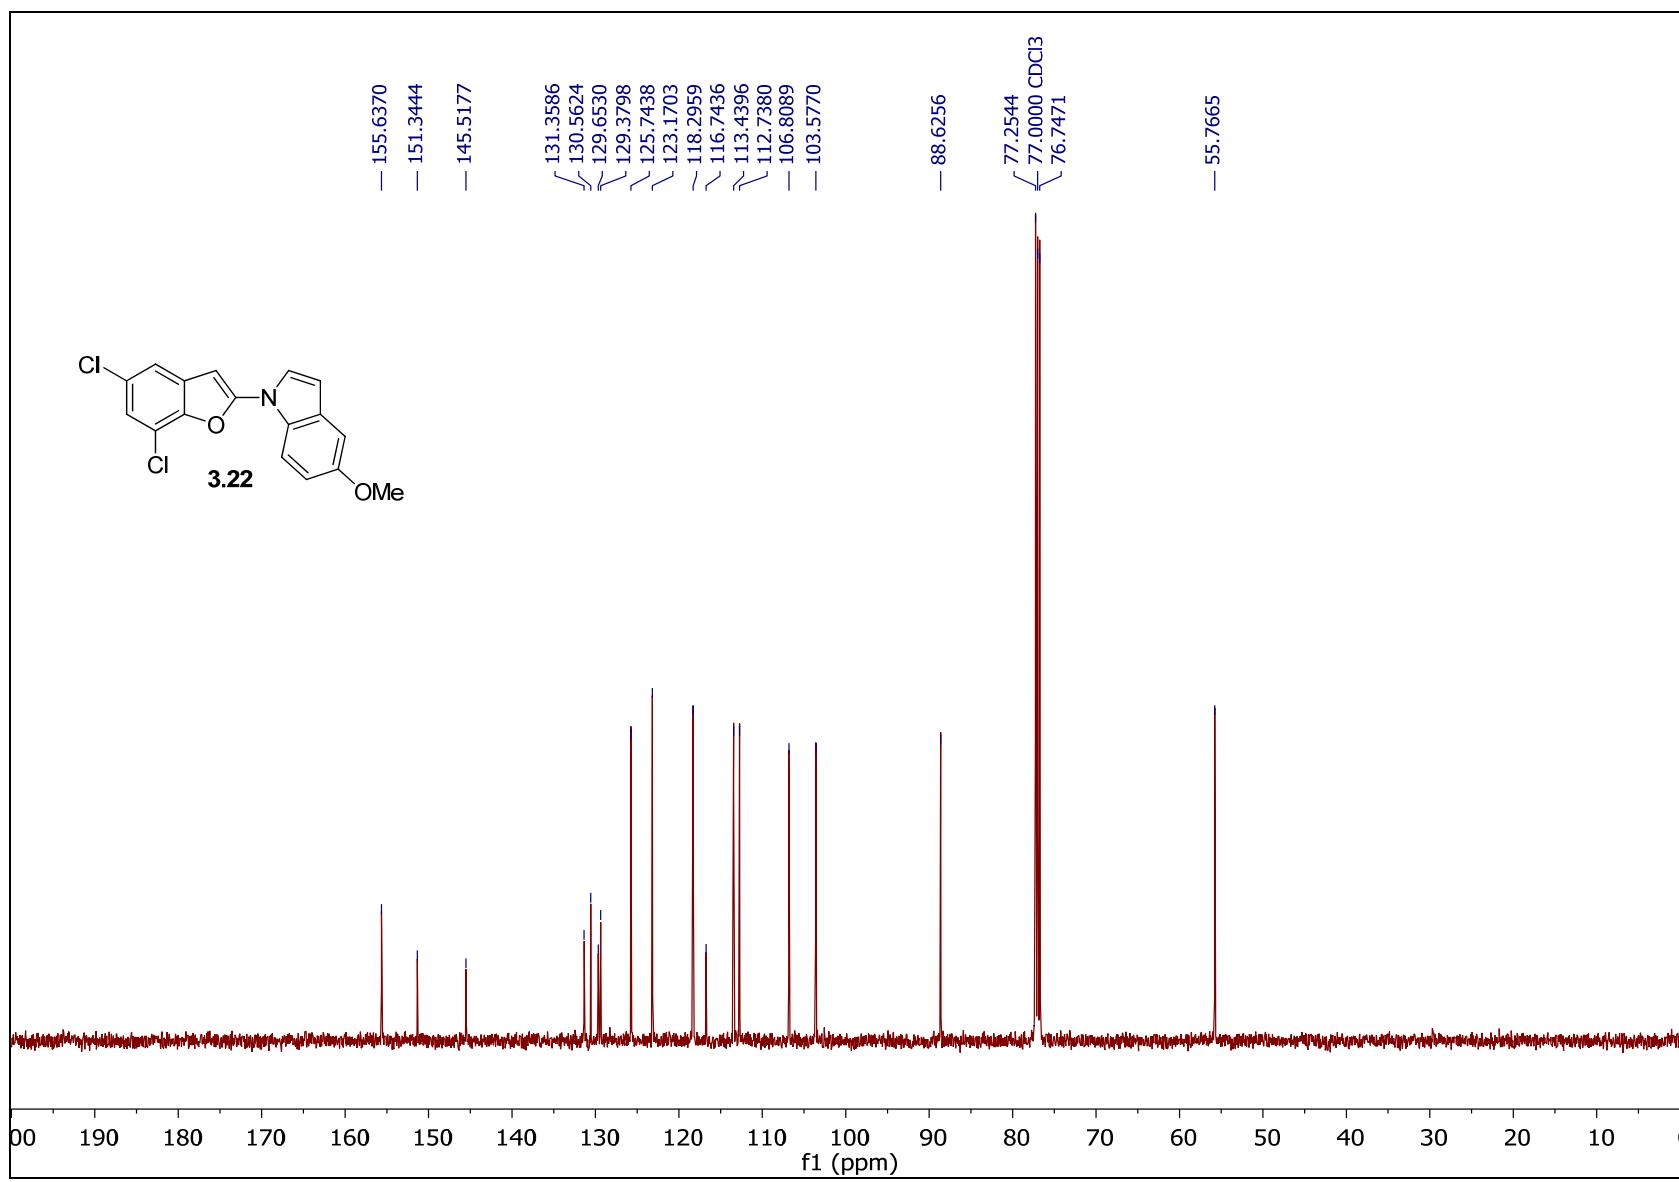

<sup>13</sup>C NMR (125 MHz, CDCl<sub>3</sub>) spectrum of **3.22**

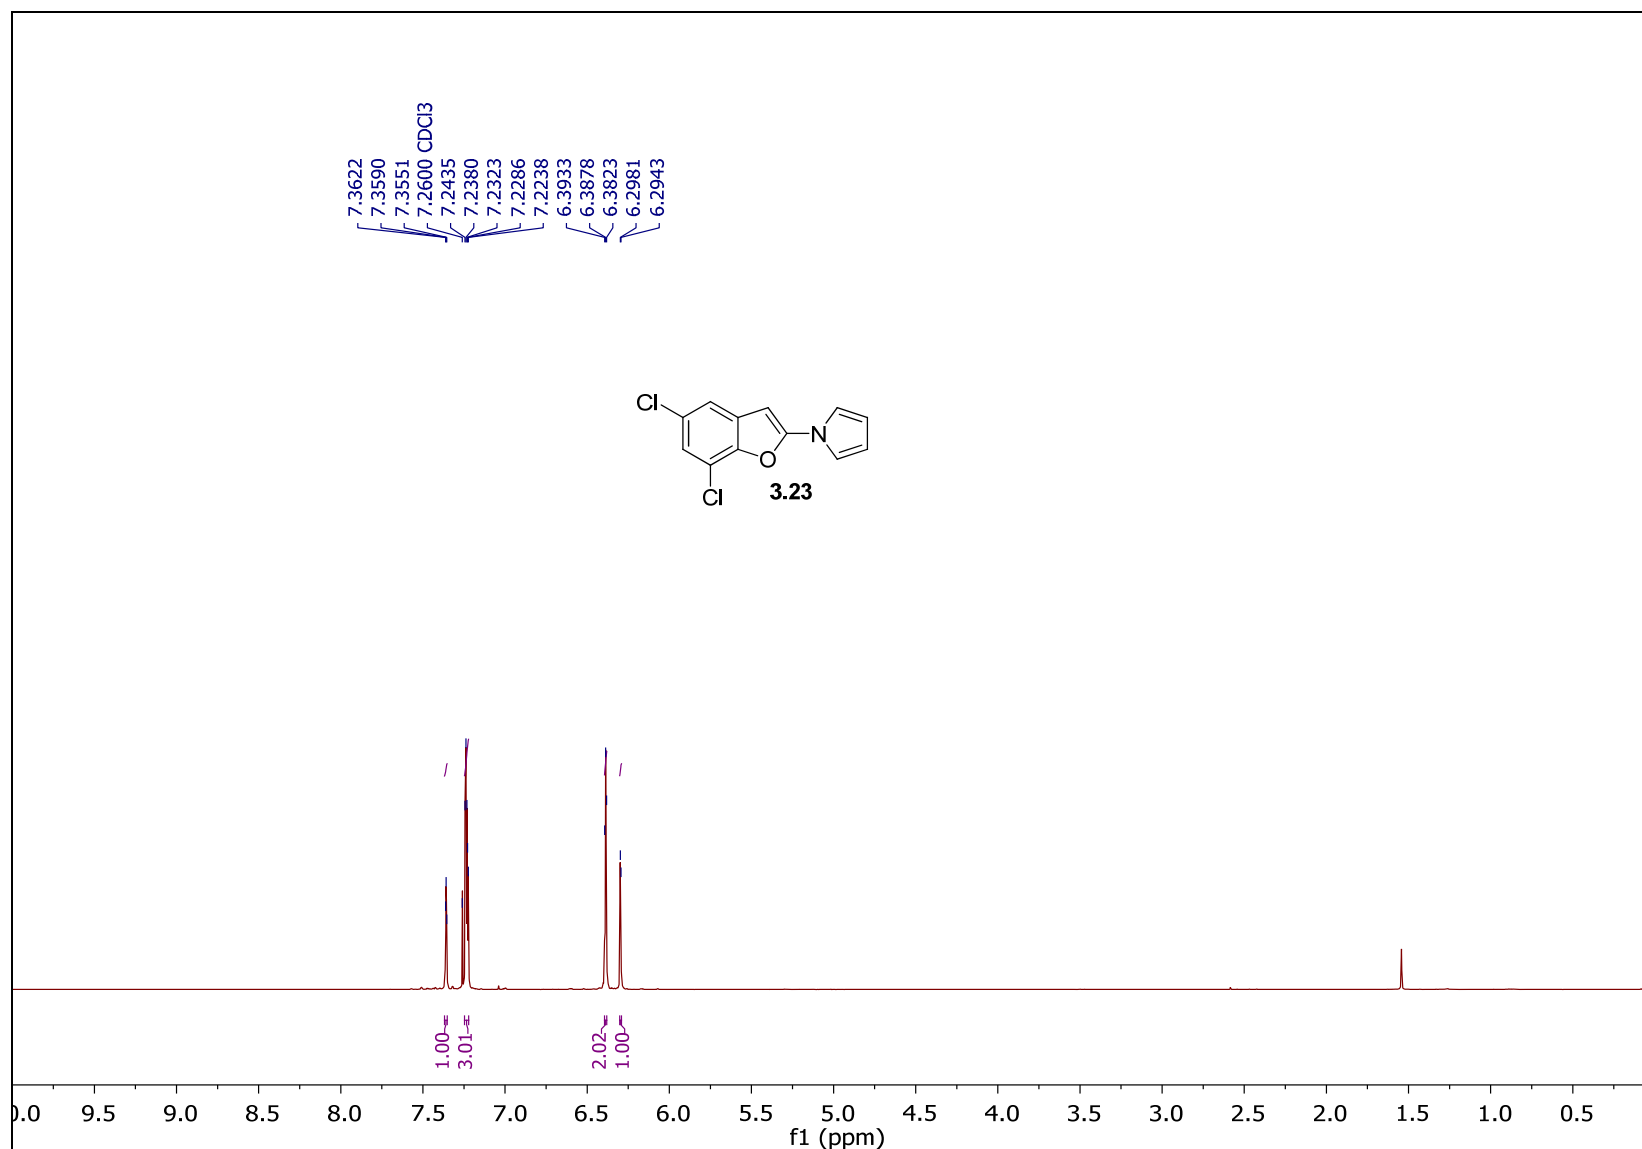

<sup>1</sup>H NMR (400 MHz, CDCl<sub>3</sub>) spectrum of **3.23**

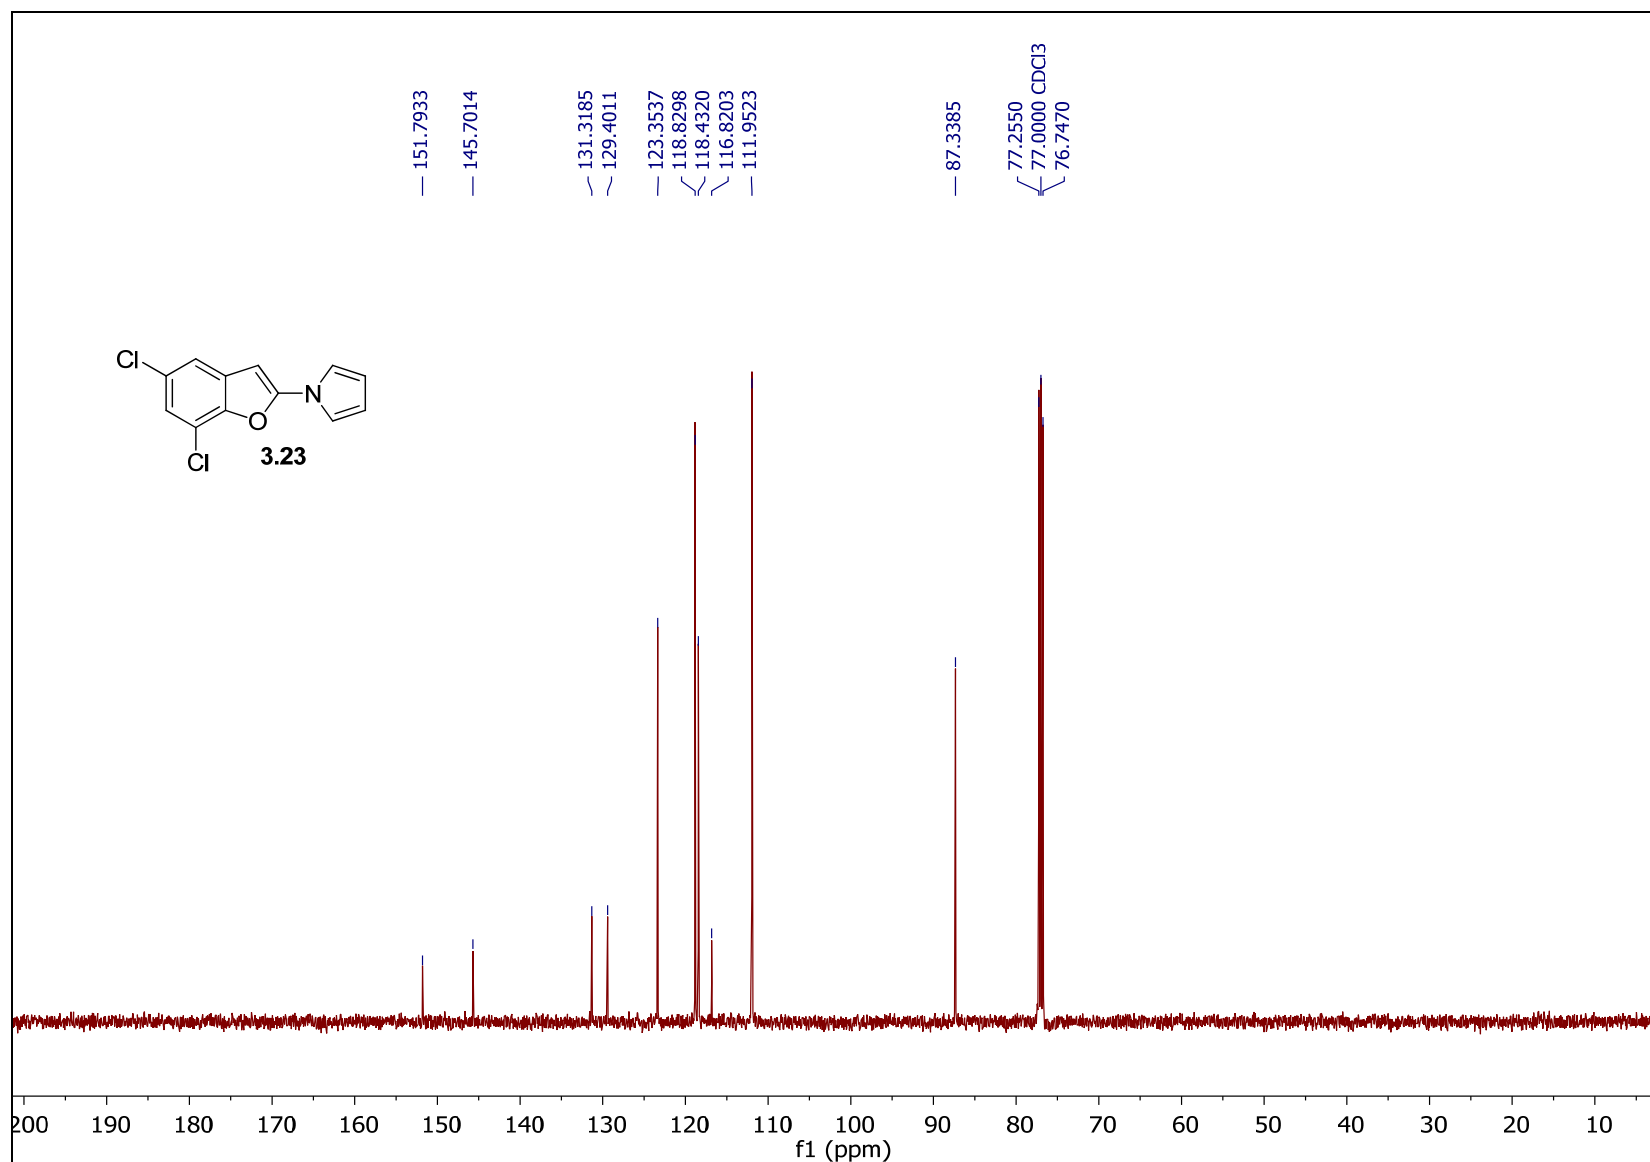

<sup>13</sup>C NMR (125 MHz, CDCl<sub>3</sub>) spectrum of **3.23**



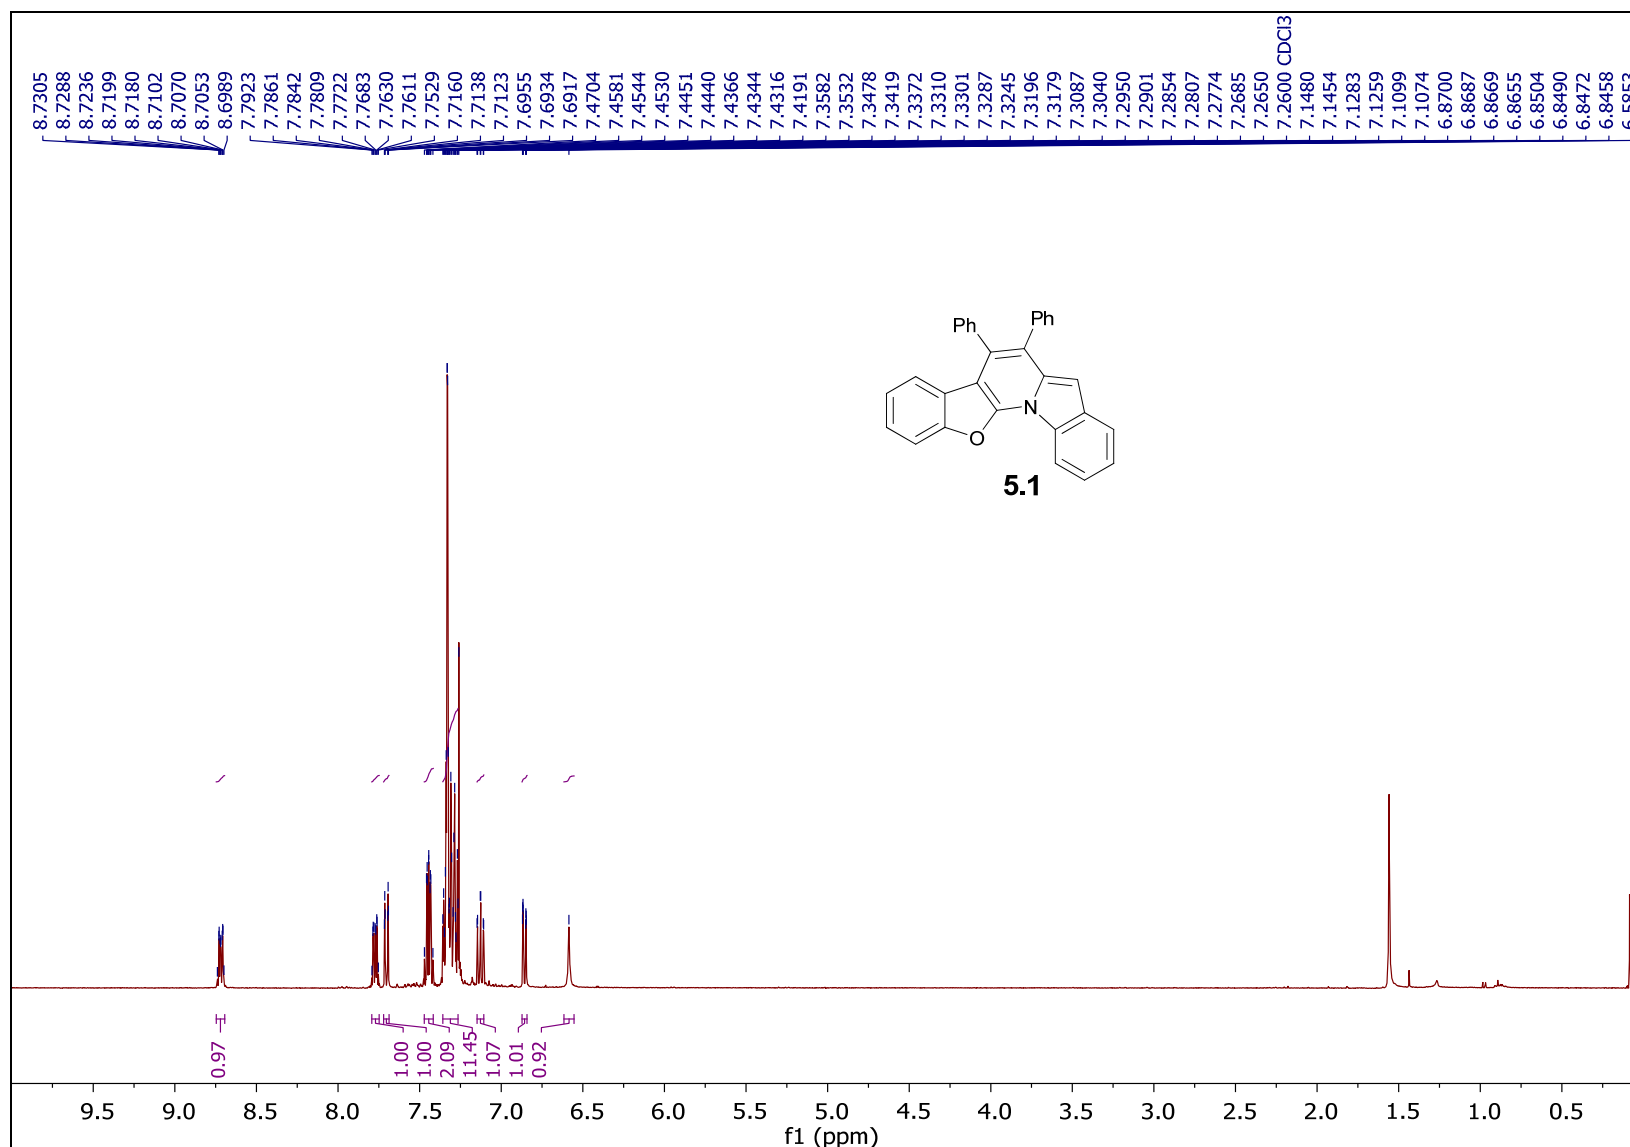

<sup>1</sup>H NMR (400 MHz, CDCl<sub>3</sub>) spectrum of **5.1**

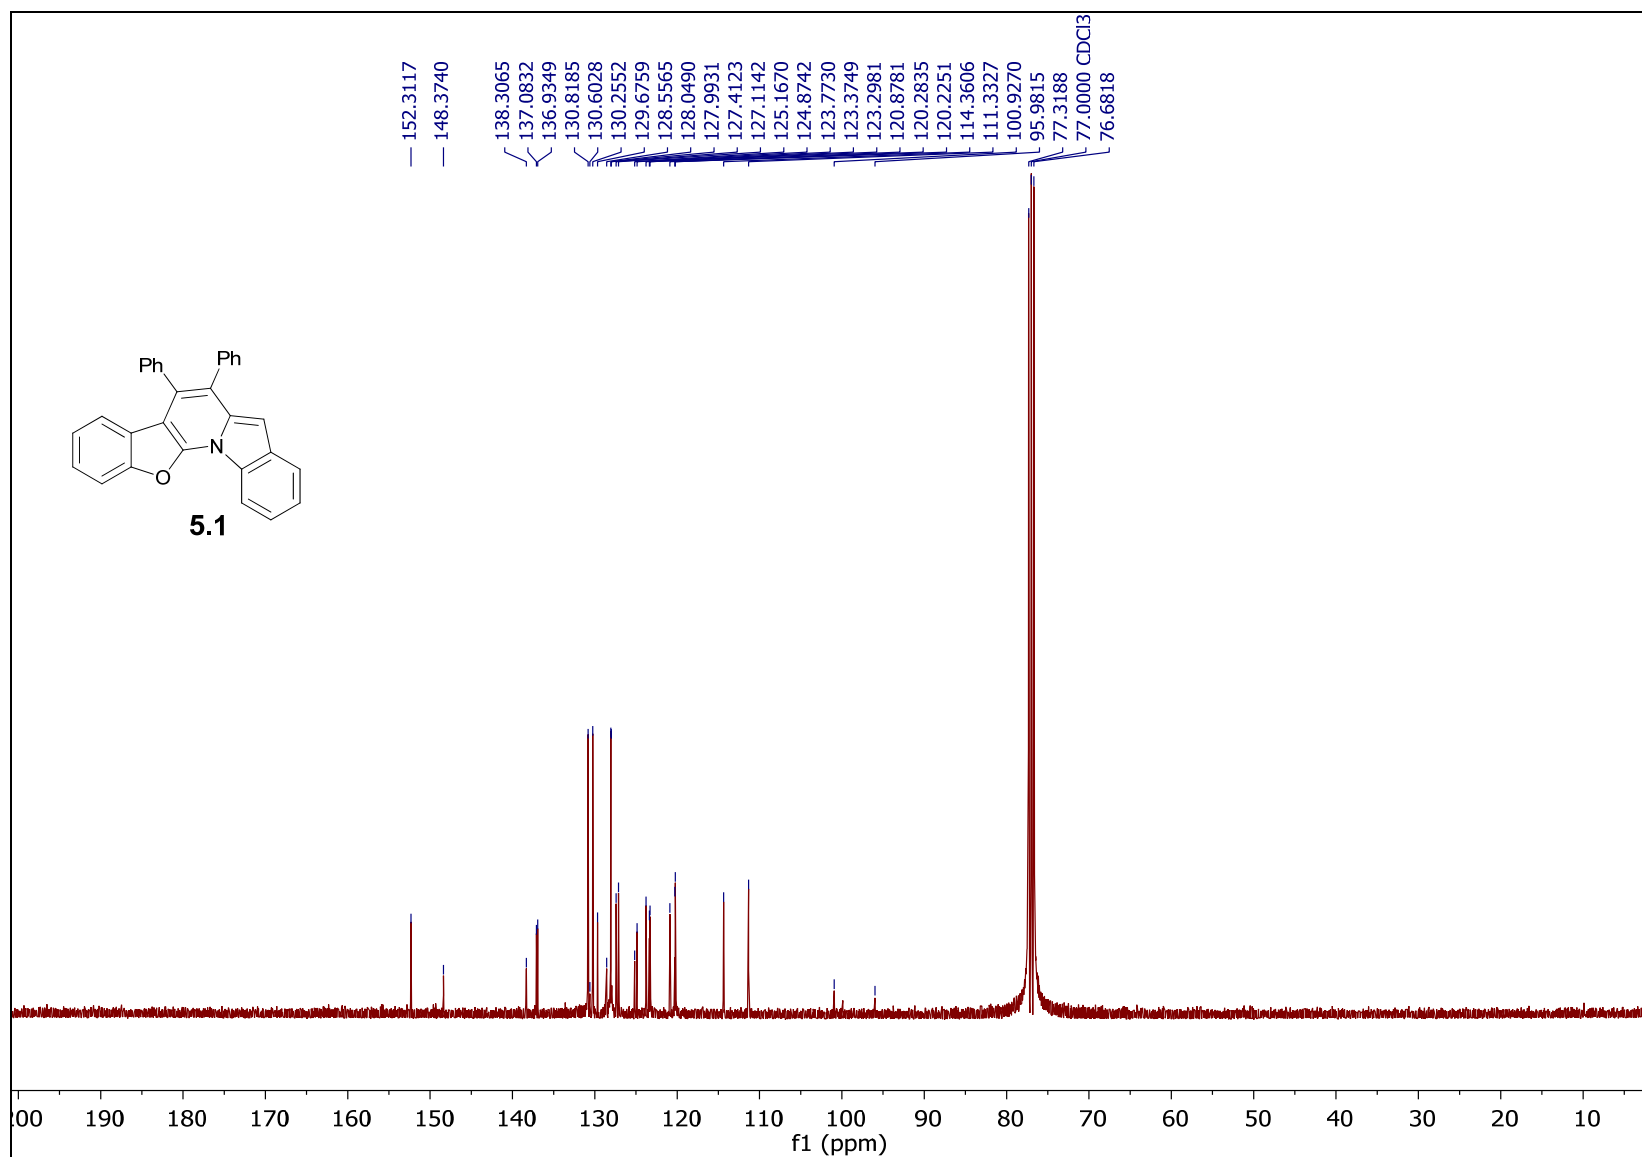

<sup>13</sup>C NMR (100 MHz, CDCl<sub>3</sub>) spectrum of **5.1**

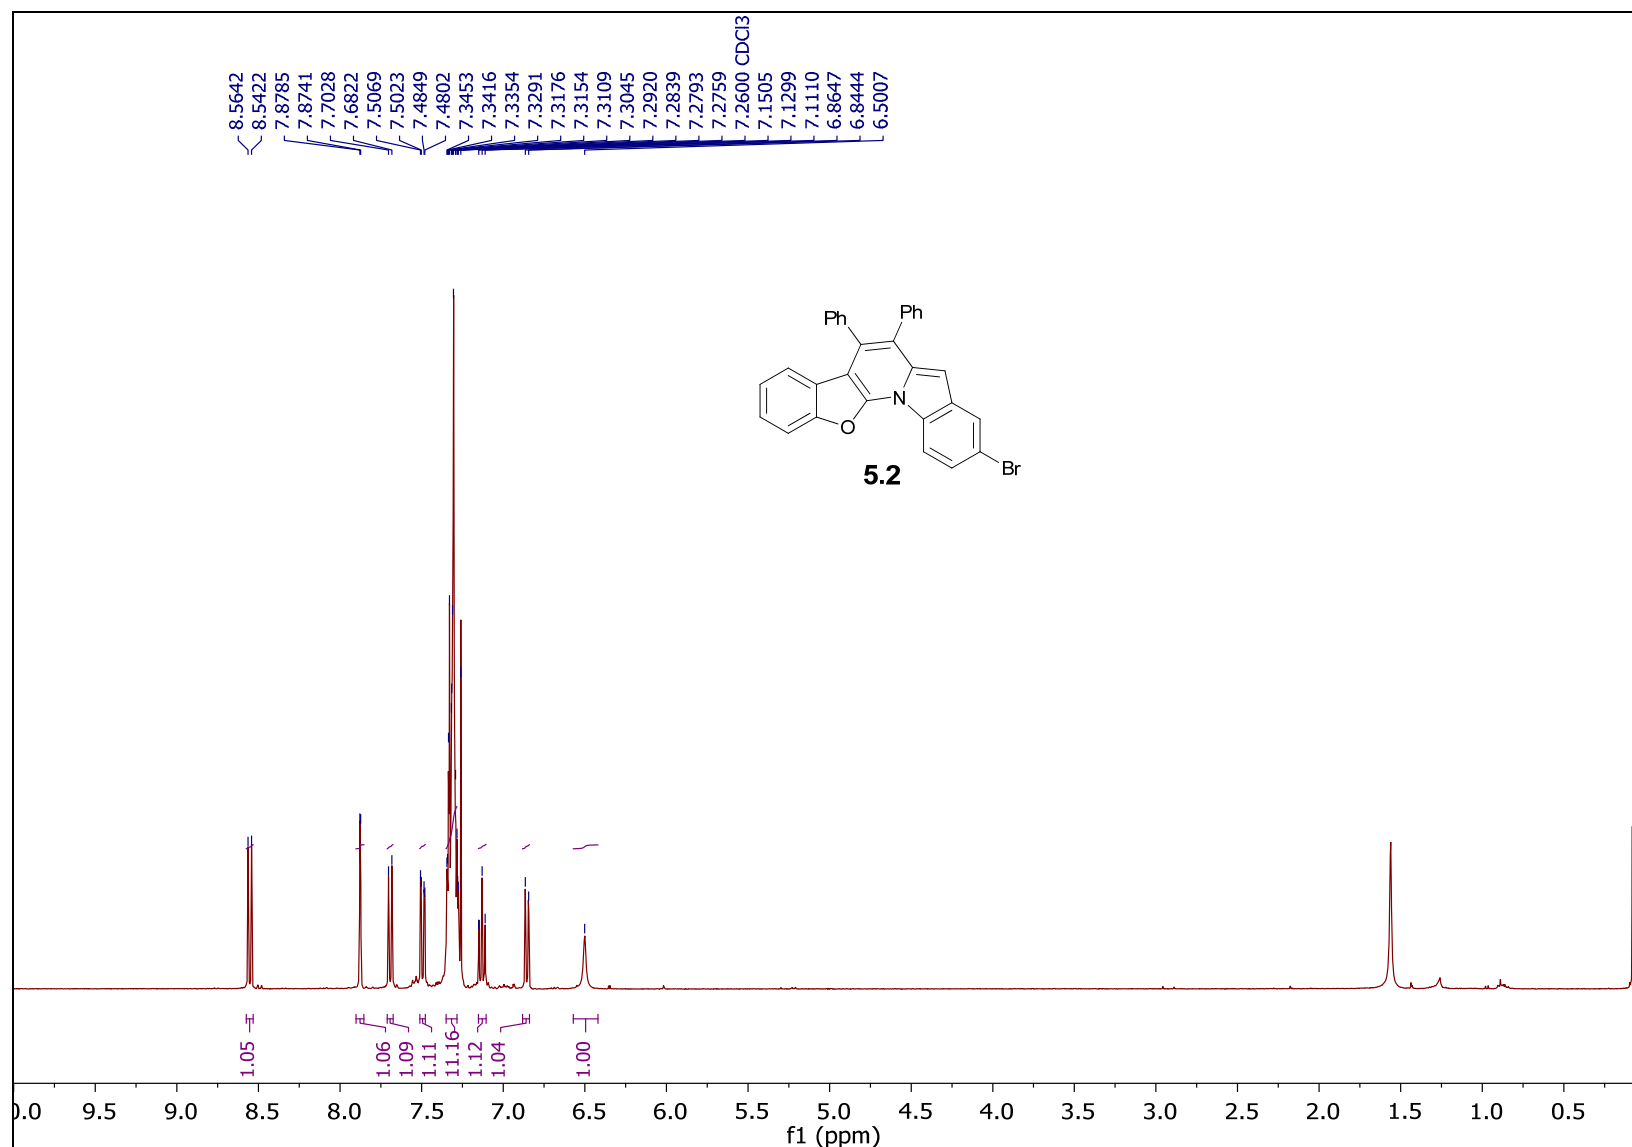

<sup>1</sup>H NMR (400 MHz, CDCl<sub>3</sub>) spectrum of **5.2**

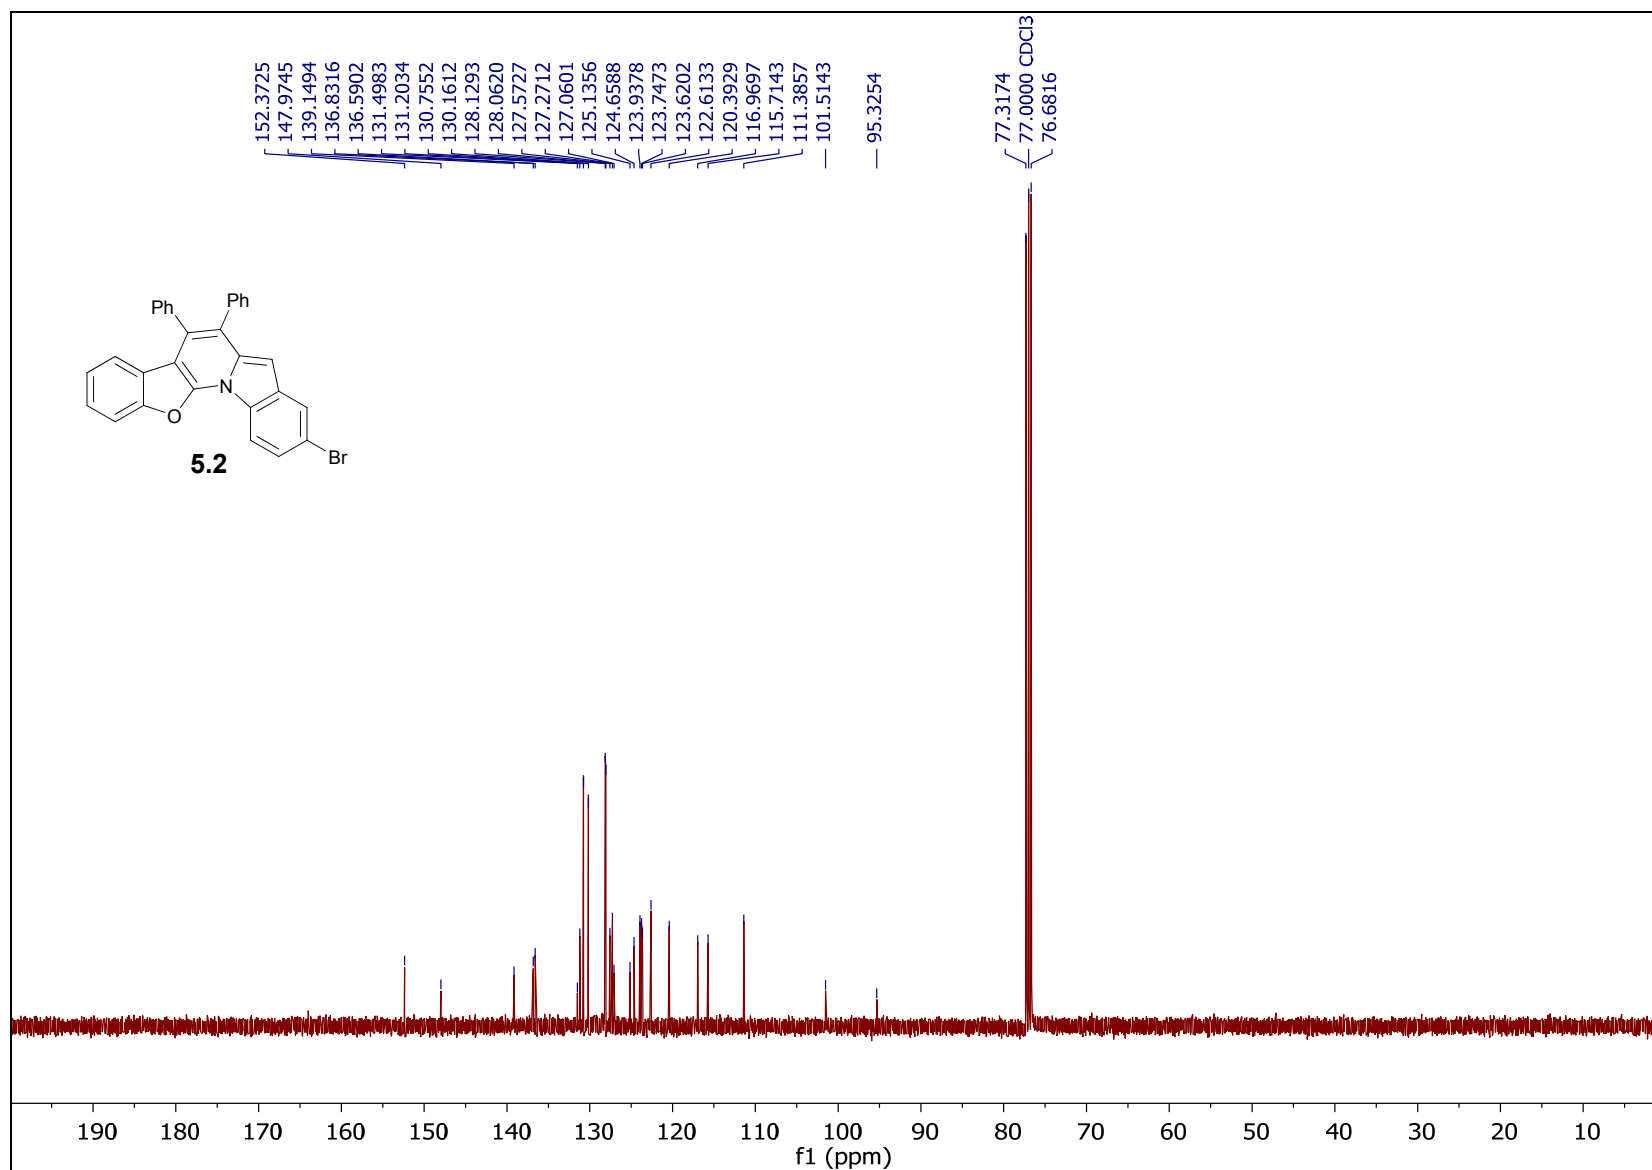

<sup>13</sup>C NMR (100 MHz, CDCl<sub>3</sub>) spectrum of **5.2**

## 9. HRMS spectra:

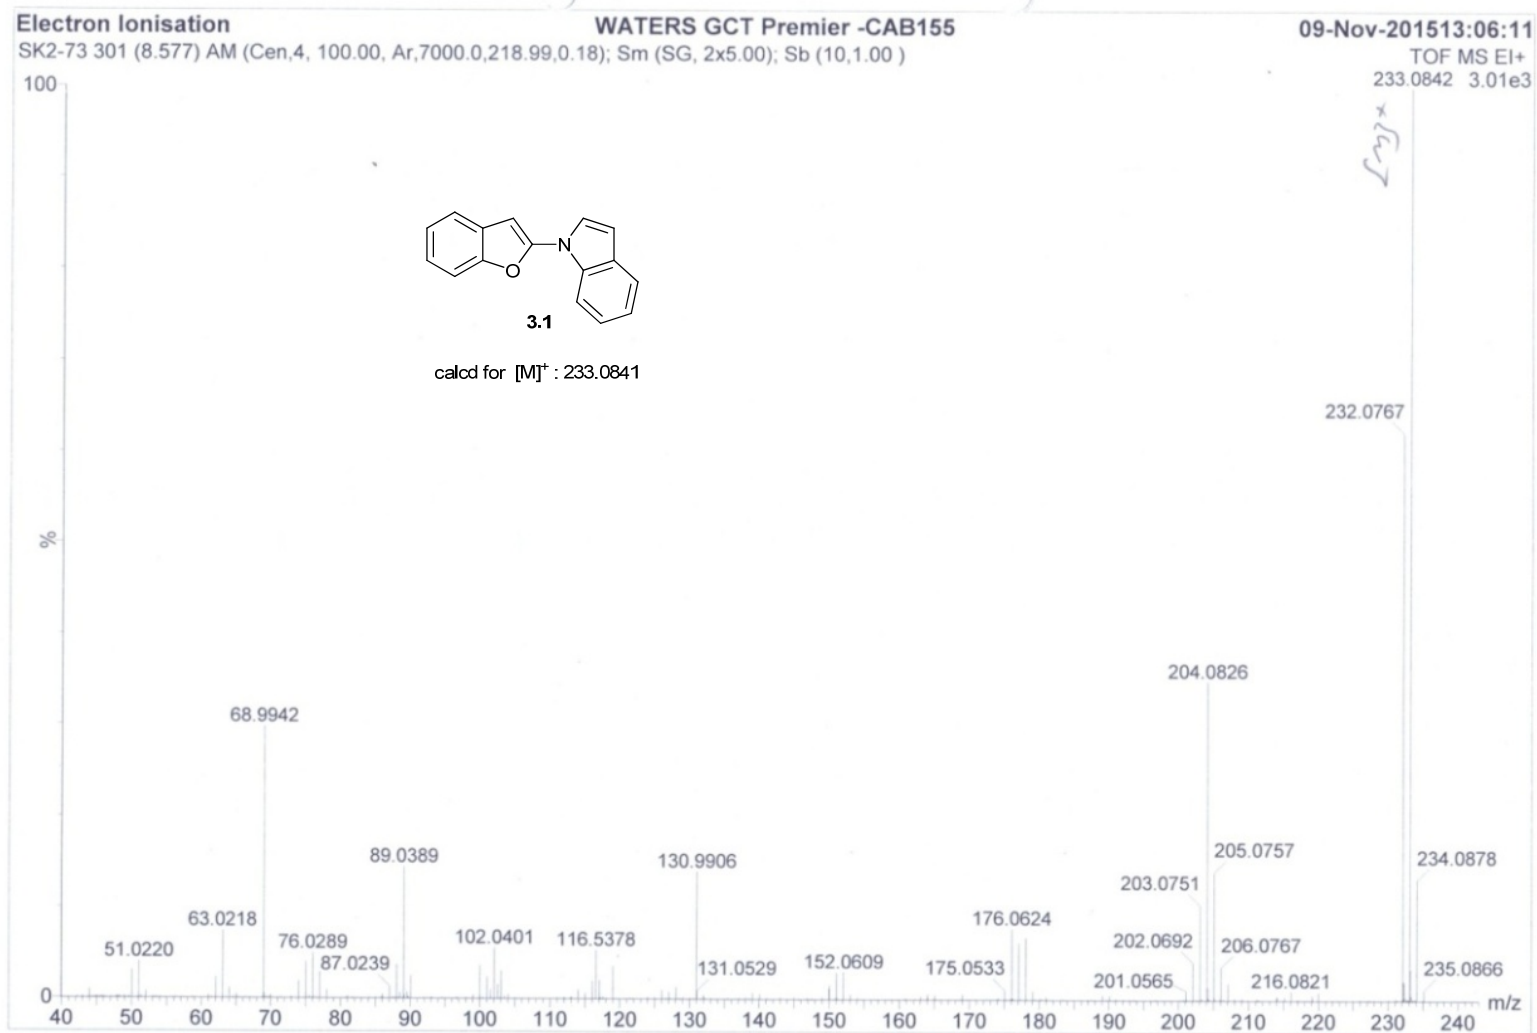

EI (HRMS) spectrum of **3.1**

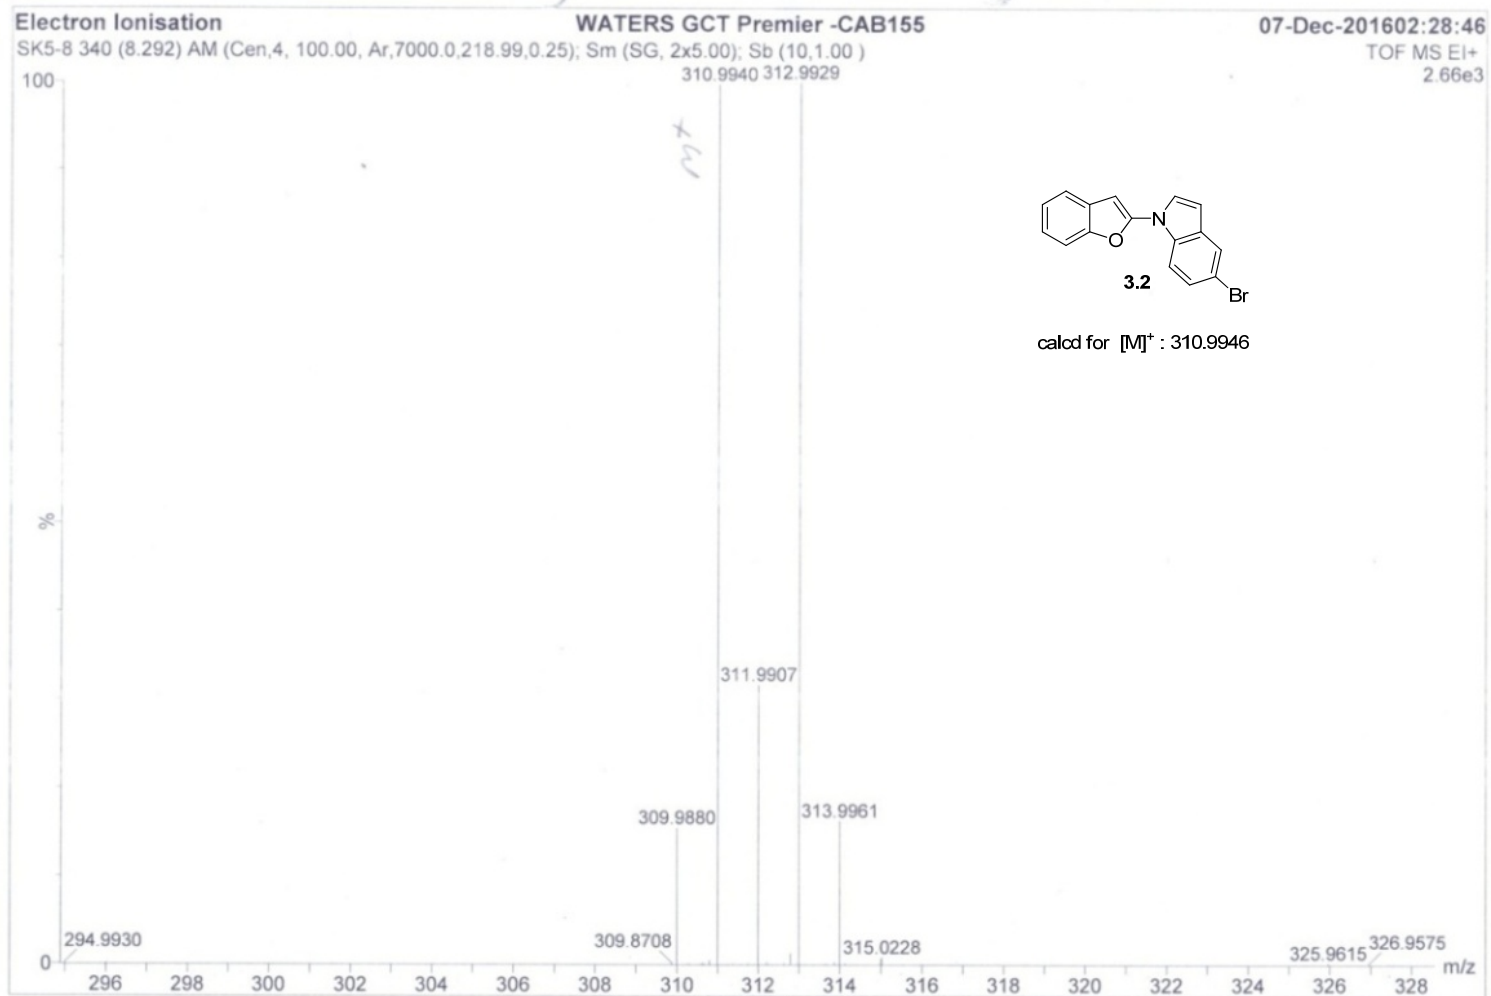

EI (HRMS) spectrum of **3.2**

Electrospray ionisation -MS

WATERS Q-TOF Premier-HAB213

27-Sep-2016

11:28:55

SK5-9 21 (0.439) AM (Cen,4, 100.00, Ar,8500.0,556.28,0.60,LS 10); Sm (SG, 2x5.00); Sb (10,1.00 ); Cm (21:23-1:3)

1: TOF MS ES+  
1.68e4

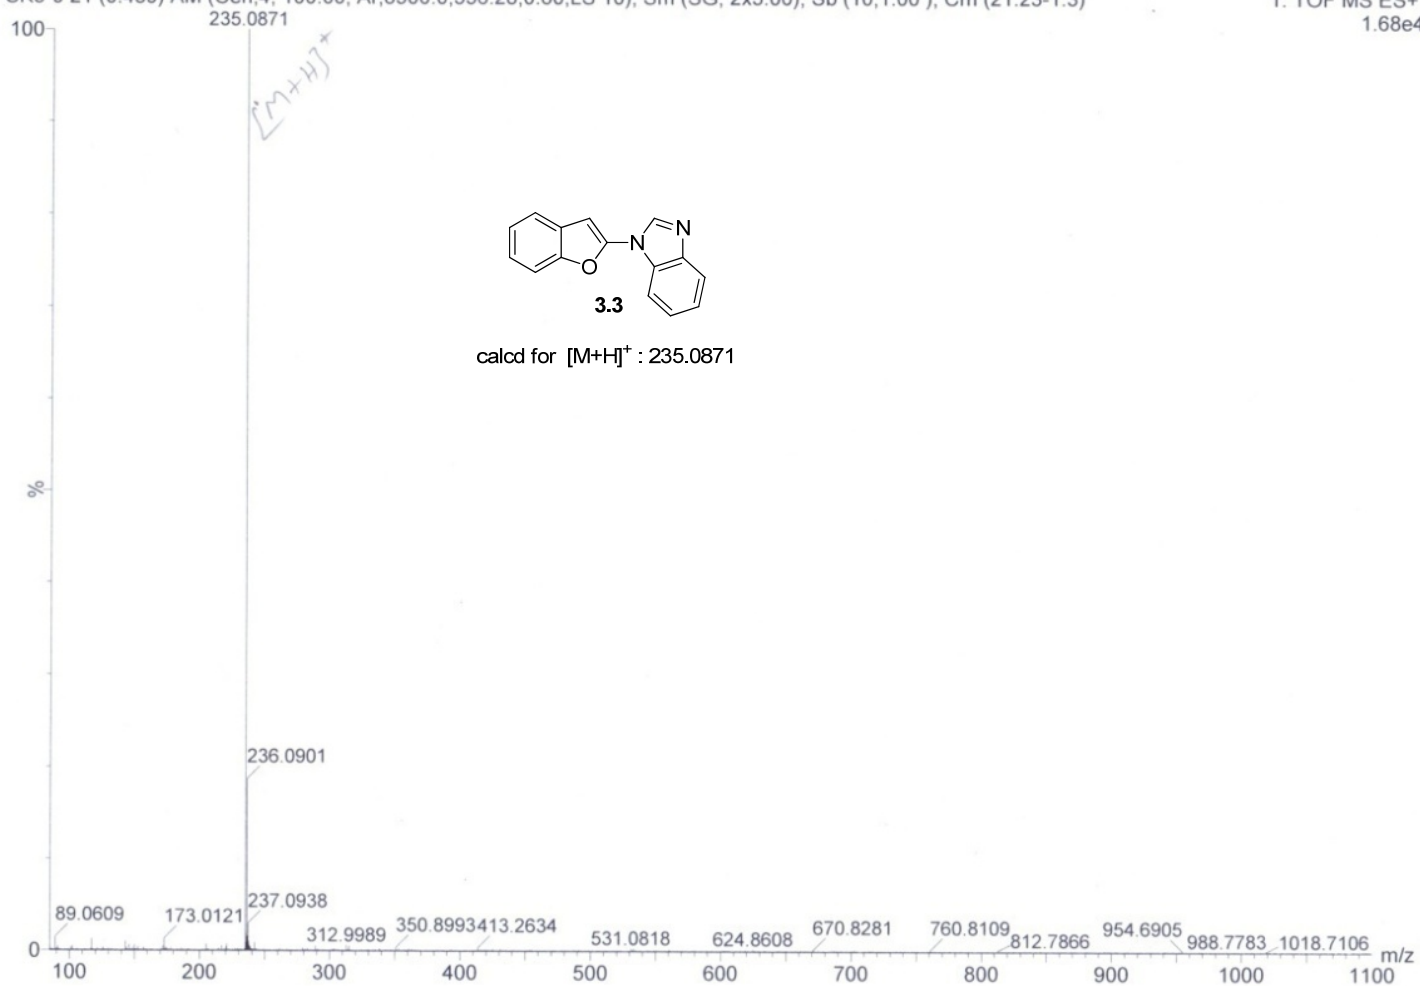

ESI (HRMS) spectrum of 3.3

Electrospray ionisation -MS

WATERS Q-TOF Premier-HAB213

27-Sep-2016

11:31:07

SK5-10 22 (0.458) AM (Cen,4, 100.00, Ar,8500.0,556.28,0.75,LS 10); Sm (SG, 2x5.00); Sb (10,1.00 ); Cm (22:23-1:3)

1: TOF MS ES+  
9.60e3

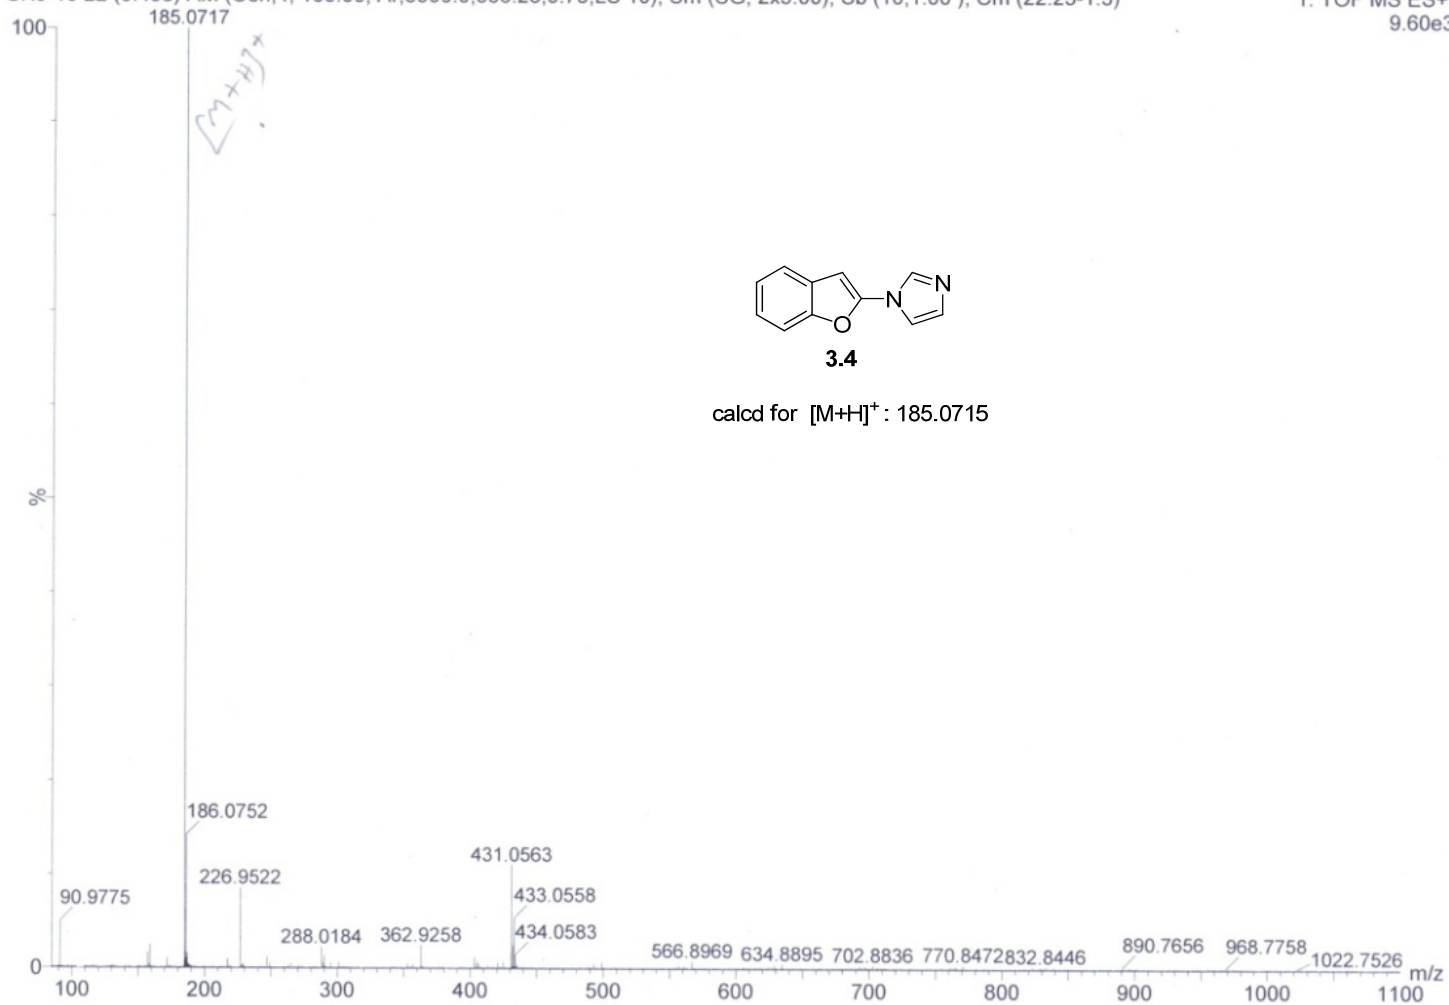

ESI (HRMS) spectrum of **3.4**



Electrospray ionisation -MS

WATERS Q-TOF Premier-HAB213

03-Nov-2017

11:28:27

SK5\_168 6 (0.240) AM (Cen,4, 100.00, Ar,8500.0,556.28,1.00,LS 10); Sm (SG, 2x5.00); Sb (10,1.00); Cm (6:9-1:3)

1: TOF MS AP+

6.95e3

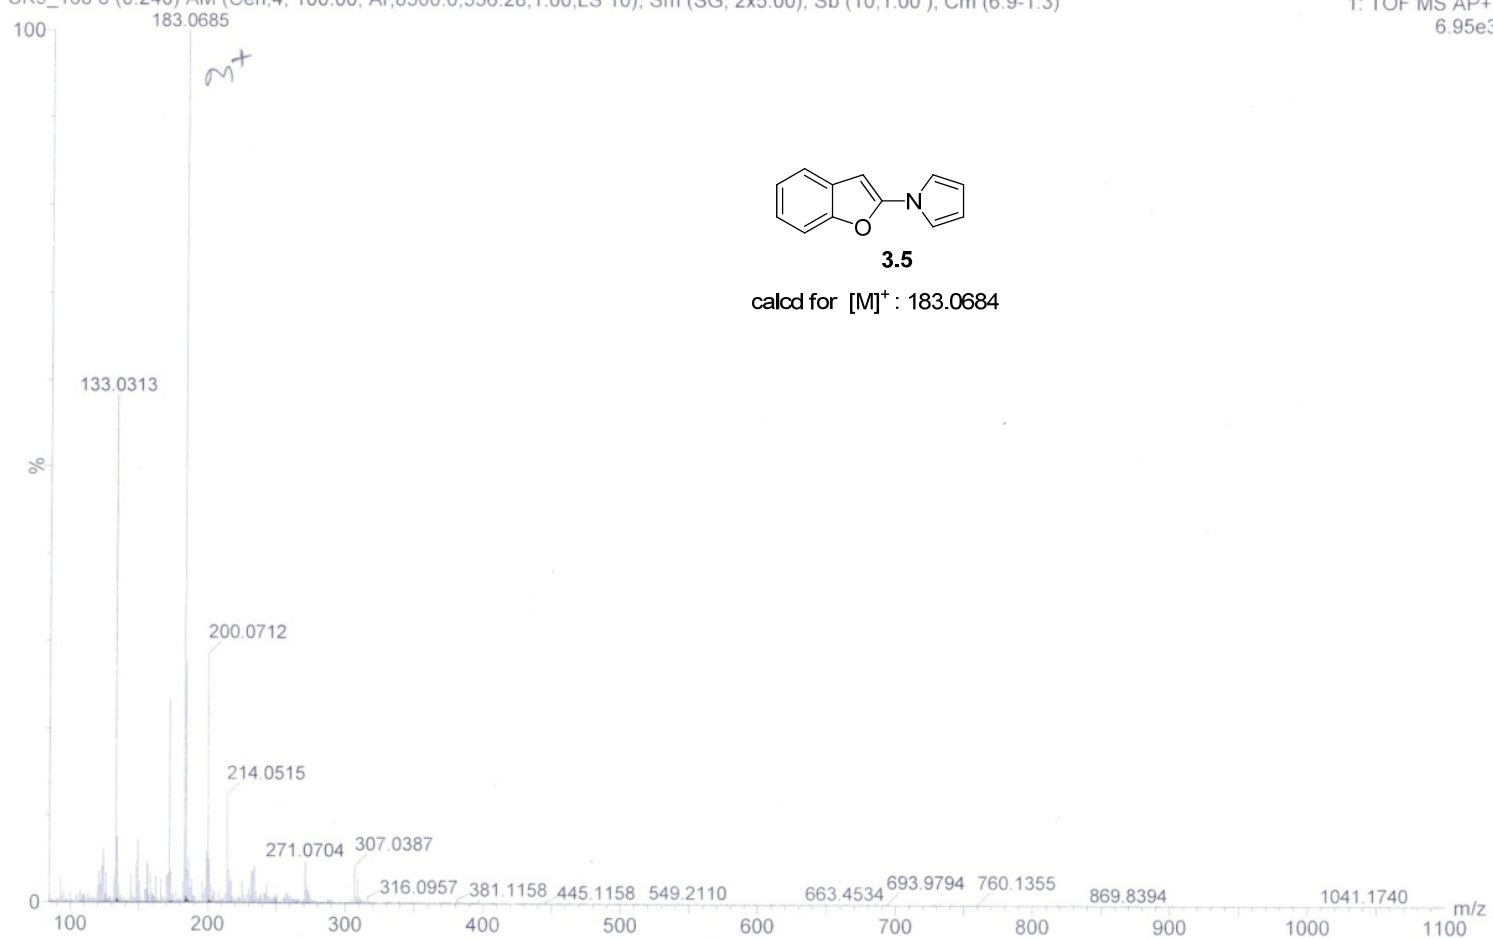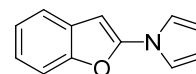

**3.5**

calcd for [M]<sup>+</sup>: 183.0684

ESI (HRMS) spectrum of **3.5**

Electron Ionisation

WATERS GCT Premier -CAB155

31-Dec-201602:52:41

SK5-21+ 288 (7.339) AM (Cen,4, 93.00, Ar,7000.0,218.99,0.20); Sm (SG, 2x5.00); Sb (10,1.00)

TOF MS EI+  
248.0952 1.41e4

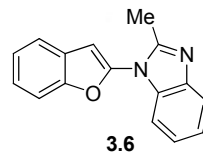

calcd for  $[M+H]^+$  : 248.0950

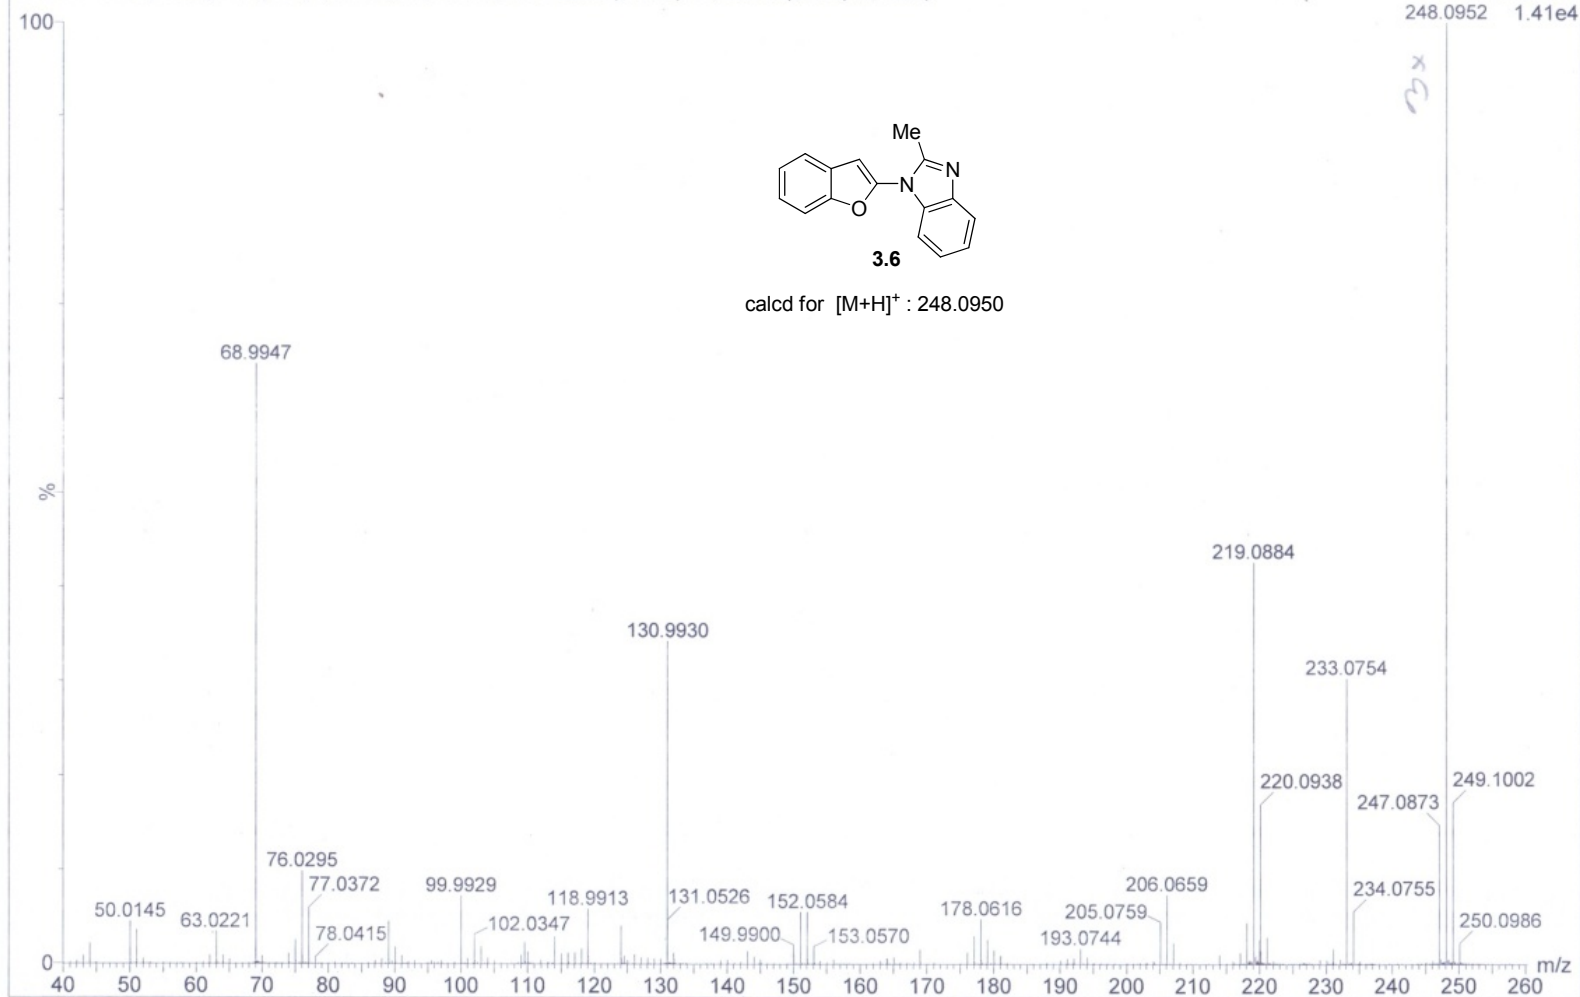

EI (HRMS) spectrum of **3.6**

Electrospray ionisation -MS

WATERS Q-TOF Premier-HAB213

03-Oct-2016

12:16:09

SK5-22 21 (0.442) AM (Cen,4, 100.00, Ar,8500.0,556.28,5.00,LS 10); Sm (SG, 2x5.00); Sb (10,1.00 ); Cm (21:22-1:3)

1: TOF MS ES+  
1.04e4

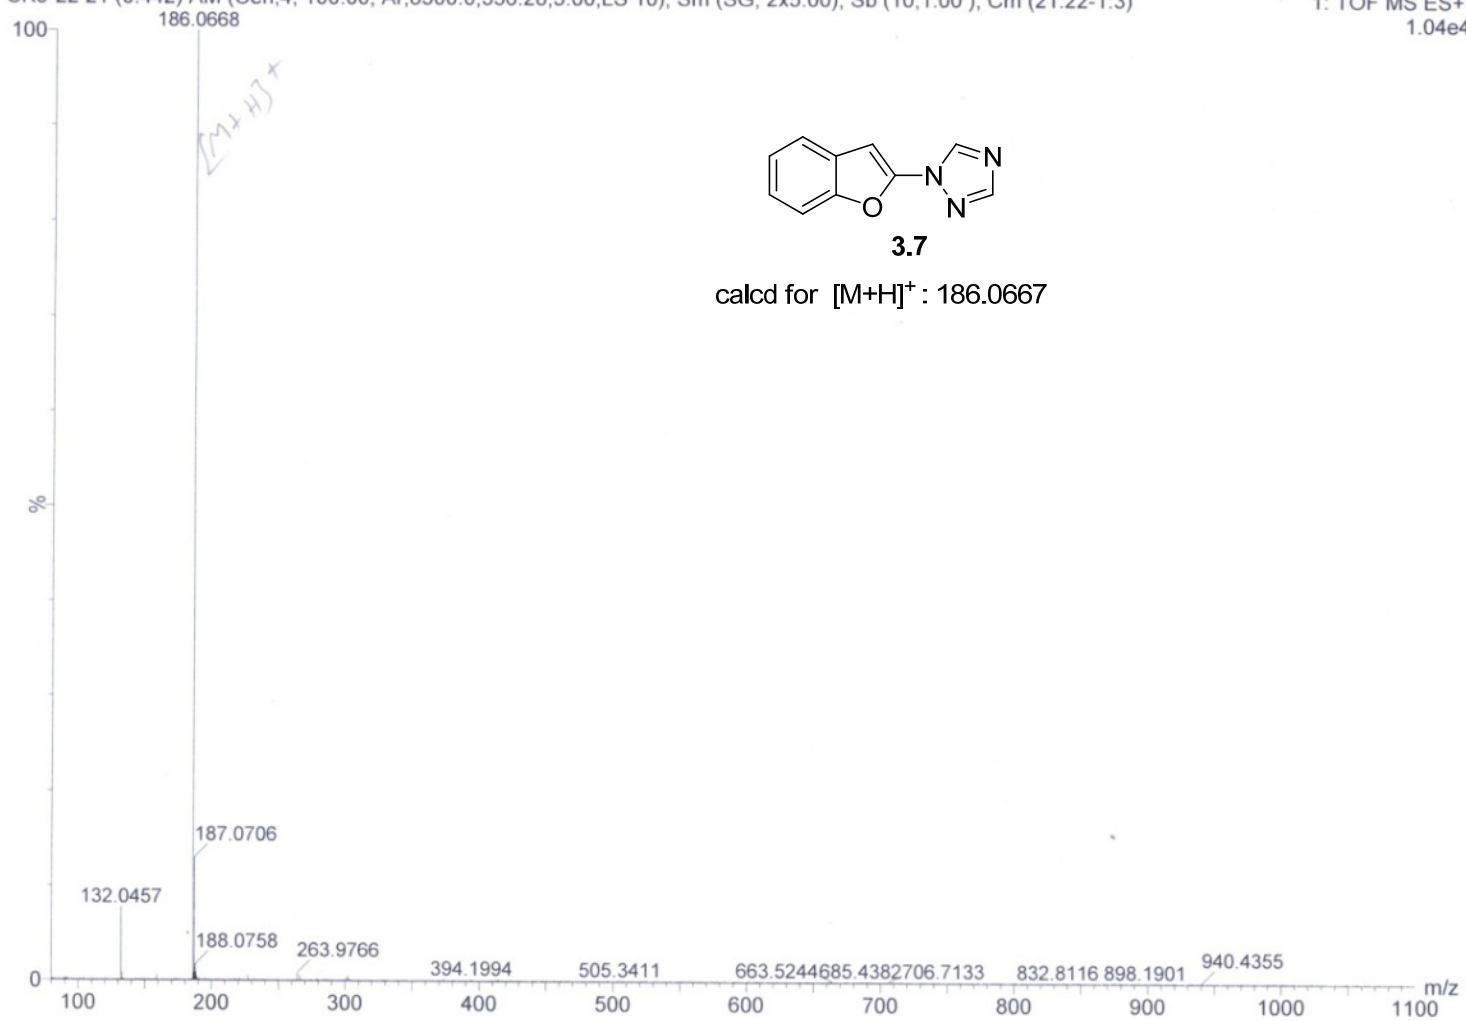

ESI (HRMS) spectrum of **3.7**

Electrospray ionisation -MS

WATERS Q-TOF Premier-HAB213

27-Sep-2016

11:35:32

SK5-5 15 (0.311) AM (Cen,4, 100.00, Ar,8500.0,556.28,0.75,LS 10); Sm (SG, 2x5.00); Sb (10,1.00 ); Cm (15:18-1:4)

1: TOF MS ES+  
7.80e3

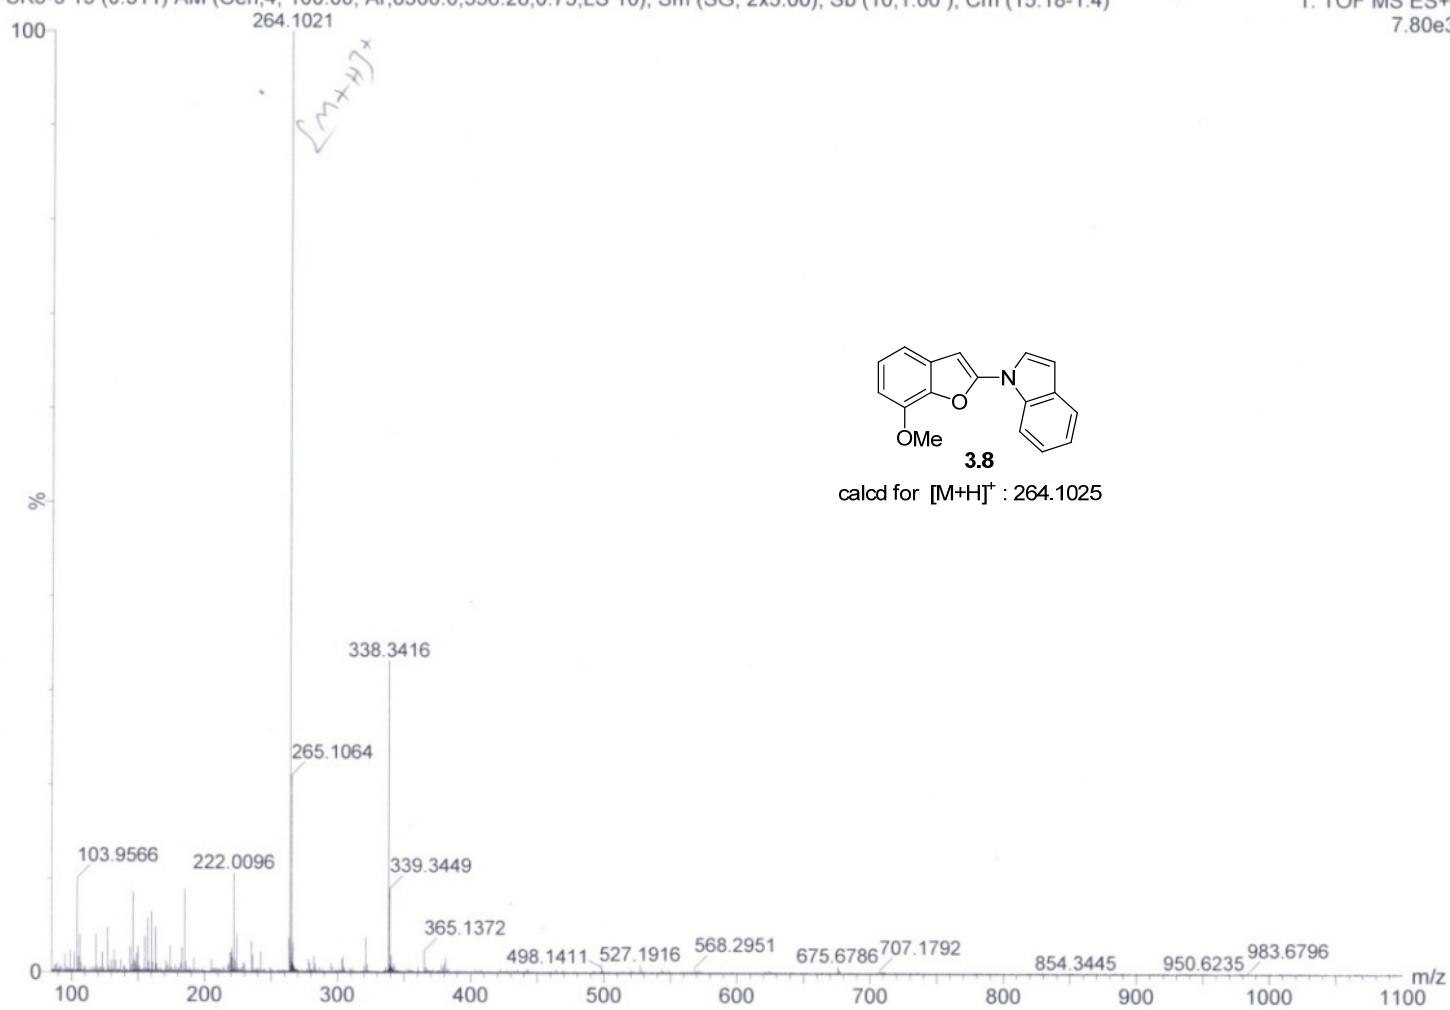

ESI (HRMS) spectrum of **3.8**

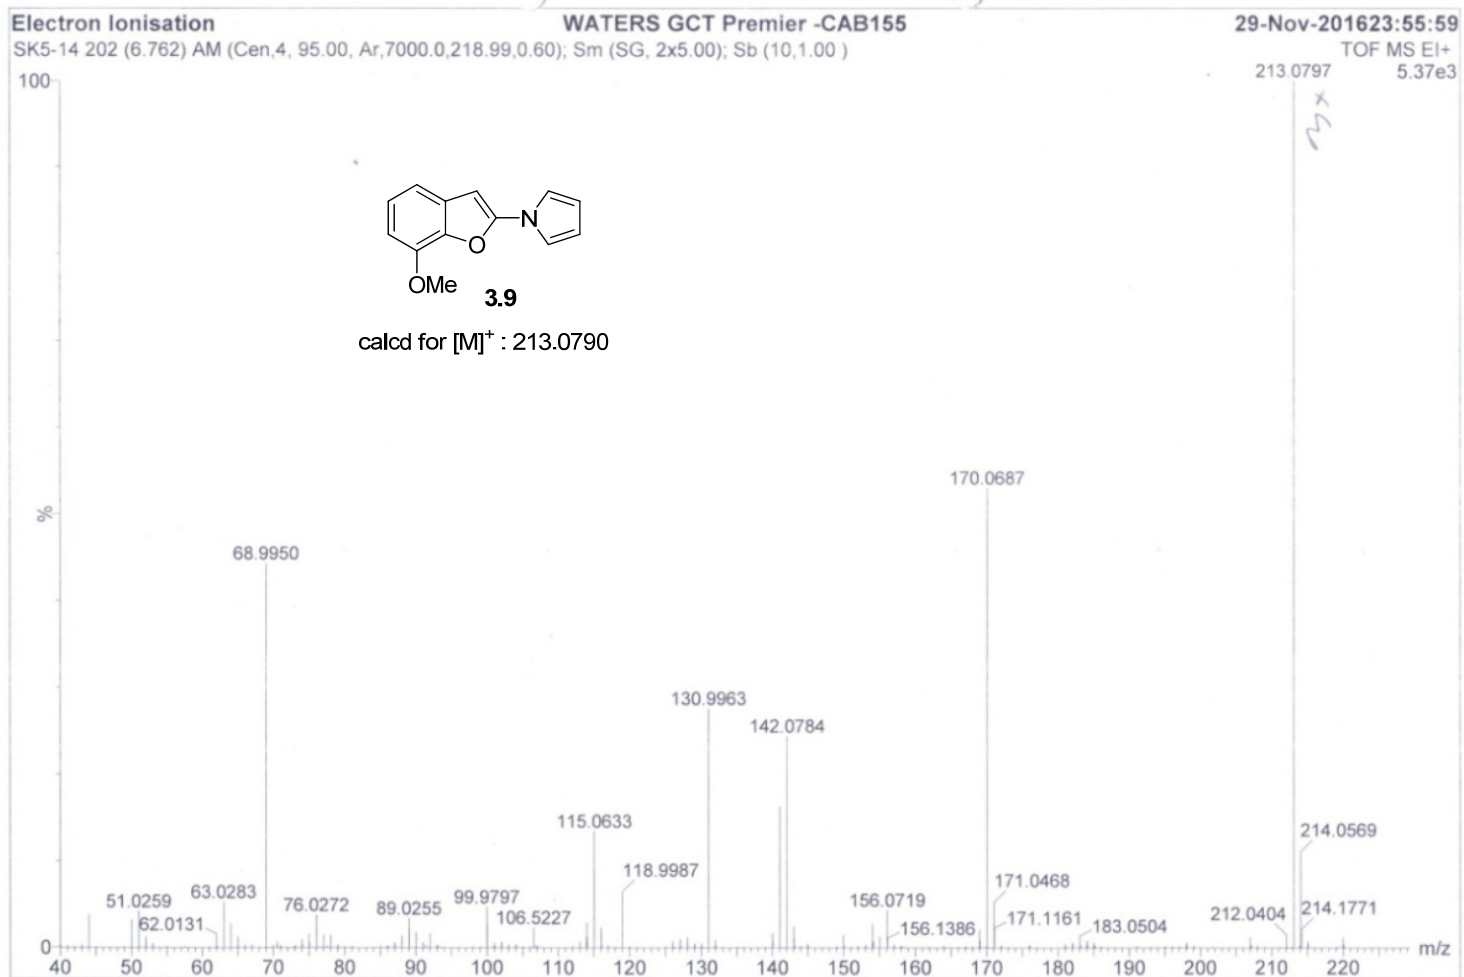

EI (HRMS) spectrum of **3.9**

Electrospray ionisation -MS

WATERS Q-TOF Premier-HAB210

30-Sep-2016

15:34:25

SK5-17 19 (0.406) AM (Cen,4, 100.00, Ar,8500.0,556.28,0.70,LS 10); Sm (SG, 2x5.00); Sb (10,1.00 ); Cm (18:19-1:3)

1: TOF MS ES+  
1.08e4

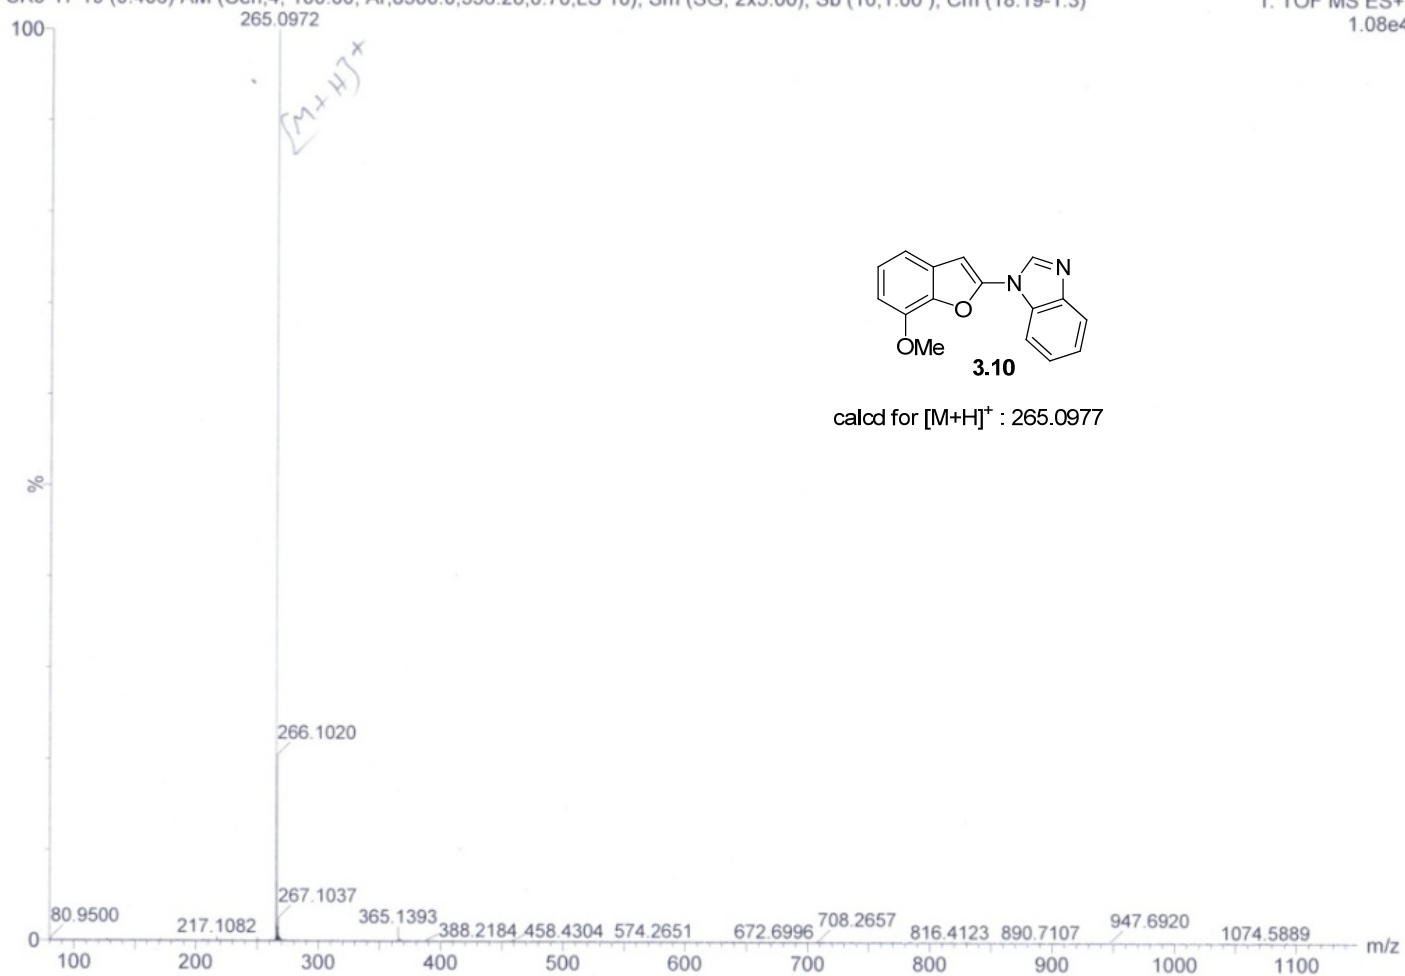

ESI (HRMS) spectrum of **3.10**

Electrospray ionisation -MS

WATERS Q-TOF Premier-HAB213

30-Sep-2016

15:36:38

SK5-18 15 (0.313) AM (Cen,4, 100.00, Ar,8500.0,556.28,0.55,LS 10); Sm (SG, 2x5.00); Sb (10,1.00 ); Cm (15:16-1:3)

1: TOF MS ES+  
1.78e4

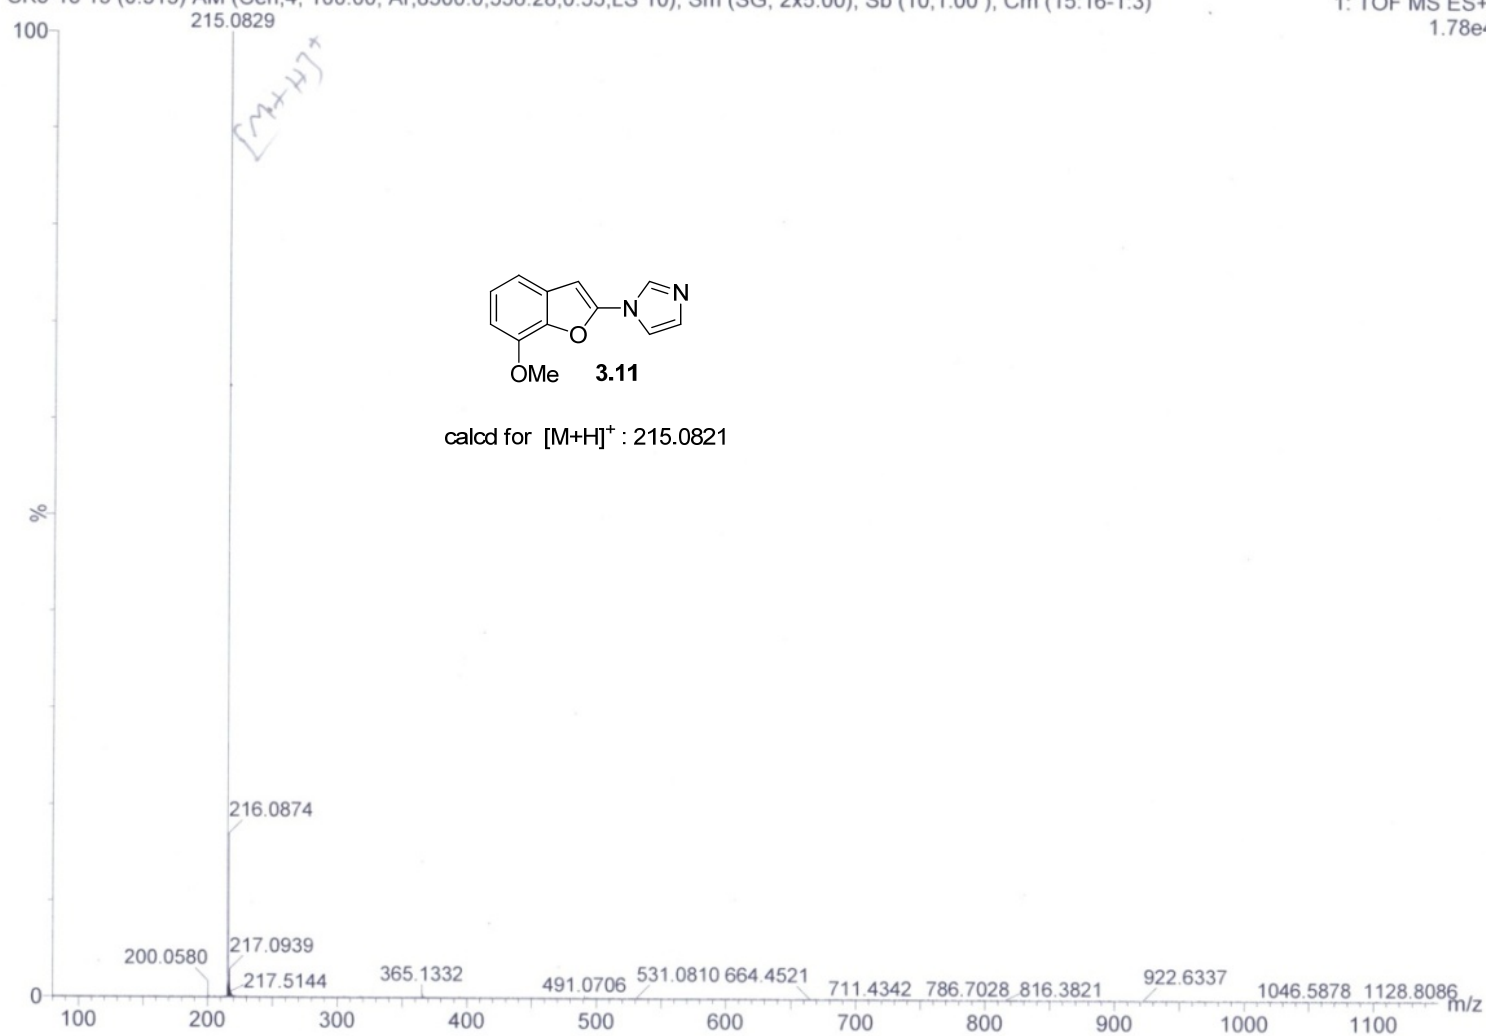

ESI (HRMS) spectrum of **3.11**

Electrospray ionisation -MS

WATERS Q-TOF Premier-HAB2.3

24-Oct-2016

11:56:47

SK-5-30 3 (0.129) AM (Cen,4, 100.00, Ar,8500.0,556.28,1.00,LS 10); Sm (SG, 2x5.00); Sb (10,1.00 ); Sb (10,1.00 ); Cm (2:8)

2: TOF MS ES+  
196

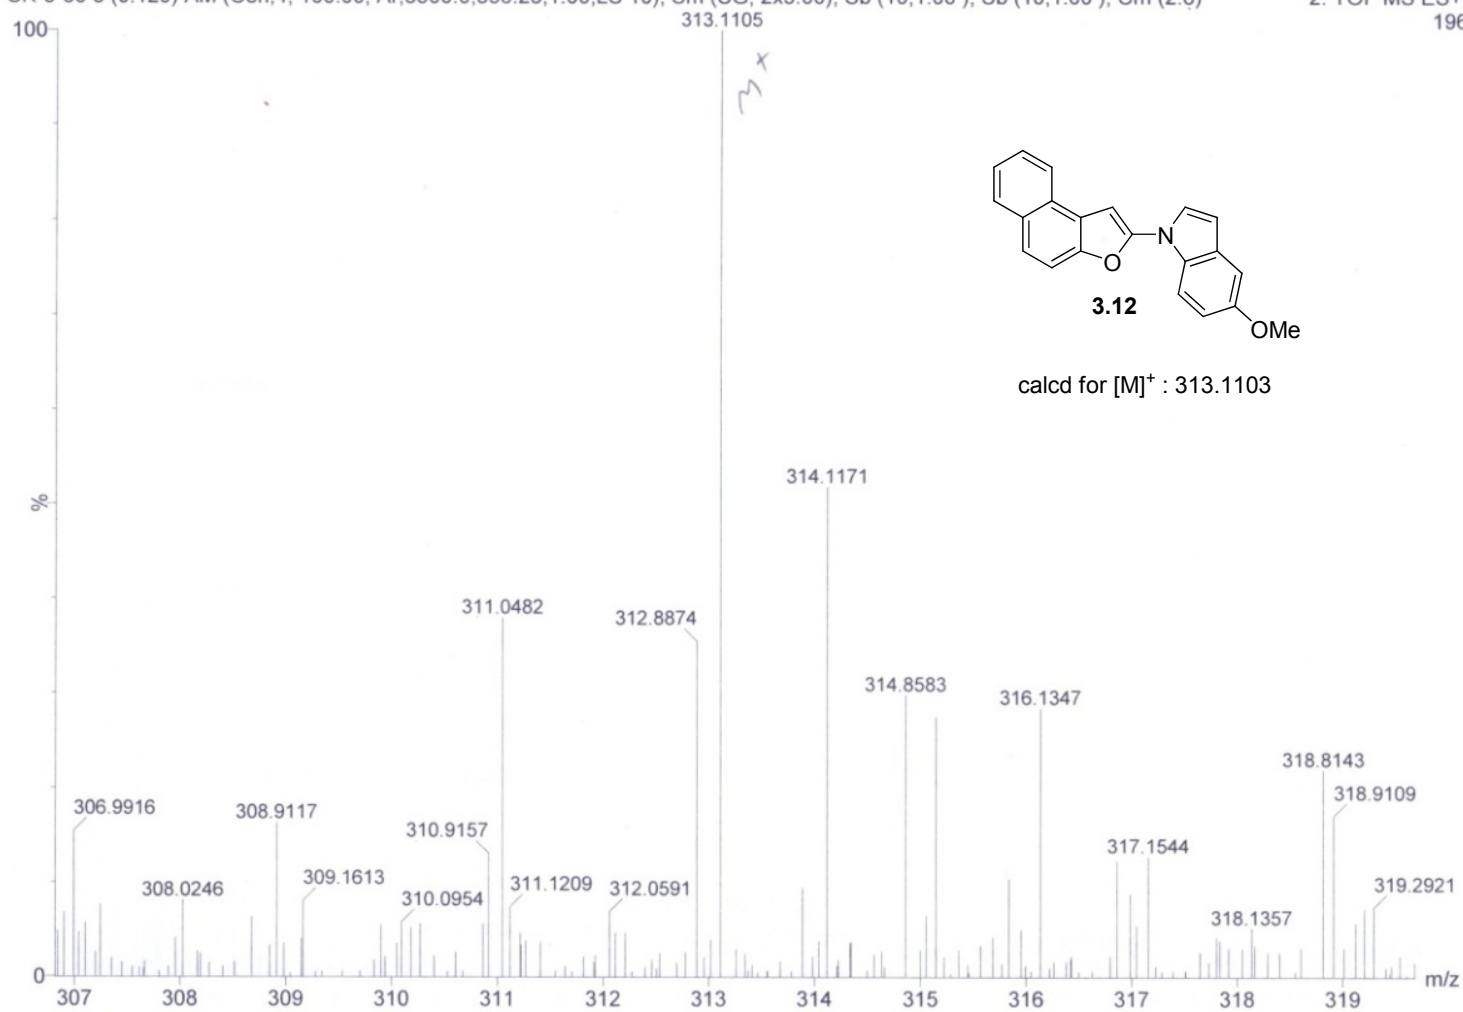

ESI (HRMS) spectrum of **3.12**



Electrospray ionisation -MS

WATERS Q-TOF Premier-HAB213

13-Oct-2016

11:29:53

SK-5-31 22 (0.461) AM (Cen,4, 100.00, Ar,8500.0,556.28,0.70,LS 10); Sm (SG, 2x5.00); Sb (10,1.00 ); Cm (22:33-100:124)

1: TOF MS ES+  
1.04e5

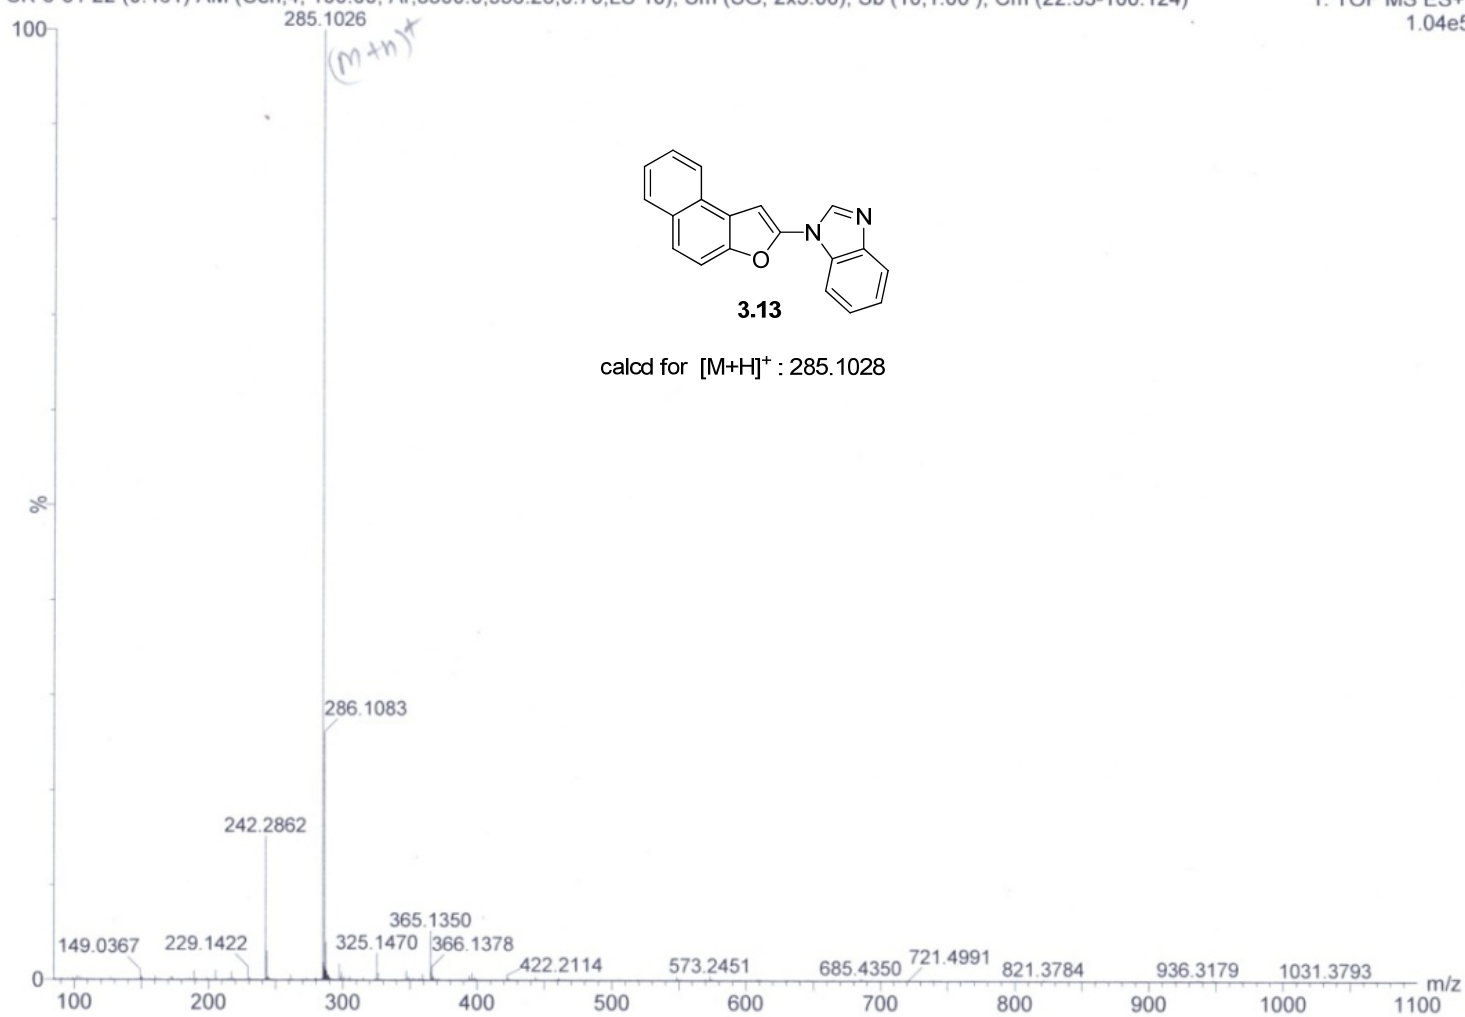

ESI (HRMS) spectrum of **3.13**

Electrospray ionisation -MS

WATERS Q-TOF Premier-HAB21

13-Oct-2016

11:34:53

SK-5-32 26 (0.553) AM (Cen,4, 100.00, Ar,8500.0,556.28,0.60,LS 10); Sm (SG, 2x5.00); Sb (10,1.00 ); Cm (26:36-254:302)

1: TOF MS ES+  
1.02e5

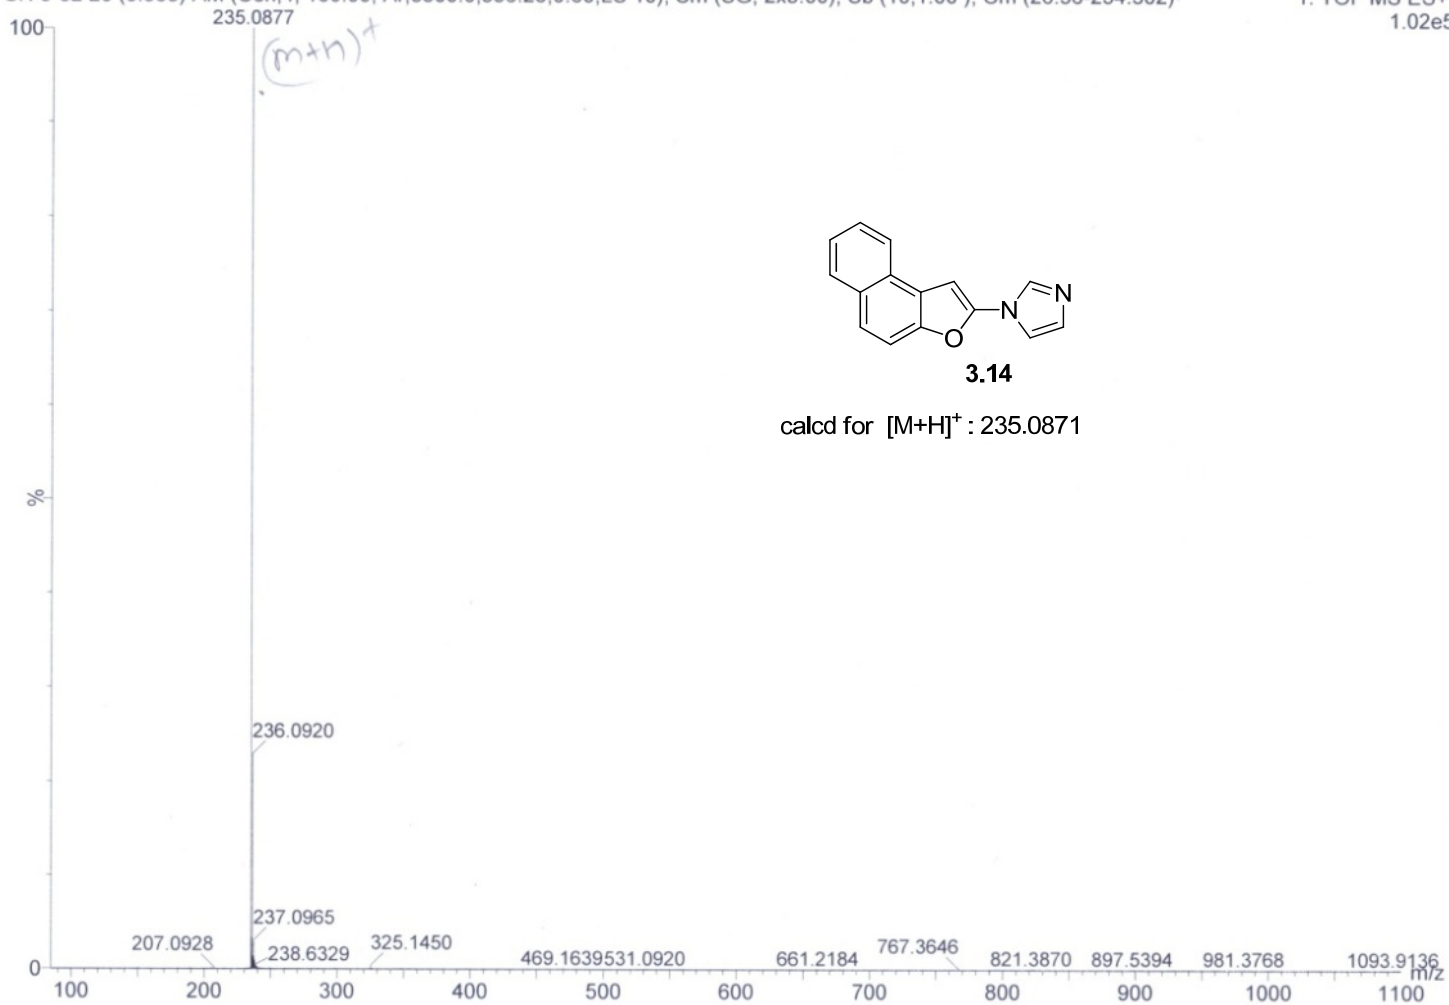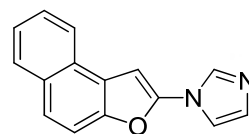

**3.14**

calcd for [M+H]<sup>+</sup> : 235.0871

ESI (HRMS) spectrum of **3.14**

Electrospray ionisation -MS

WATERS Q-TOF Premier-HAB213

31-Oct-2016

15:43:41

SK5-50 14 (0.293) AM (Cen,4, 100.00, Ar,8500.0,556.28,1.00,LS 10); Sm (SG, 2x5.00); Sb (10,1.00 ); Cm (14:18-1:3)

1: TOF MS ES+  
1.03e4

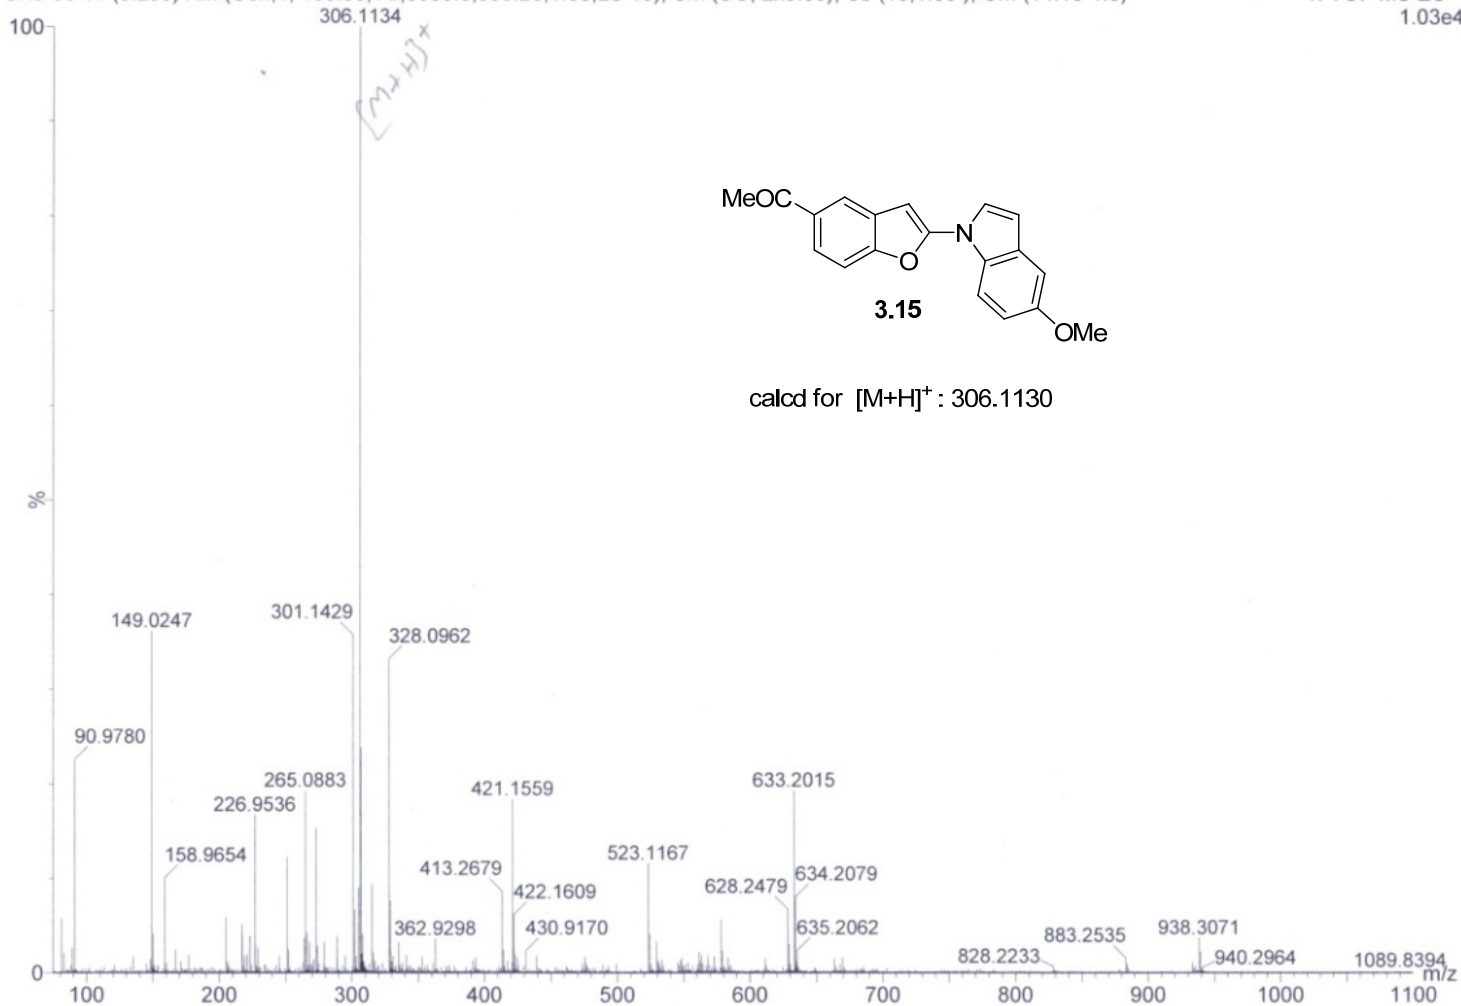

ESI (HRMS) spectrum of **3.15**

Electrospray ionisation -MS

WATERS Q-TOF Premier-HAB213

31-Oct-2016

15:51:58

SK5-51 15 (0.311) AM (Cen,4, 100.00, Ar,8500.0,556.28,0.60,LS 10); Sm (SG, 2x5.00); Sb (10,1.00 ); Cm (15:16-1:3)

1: TOF MS ES+  
1.64e4

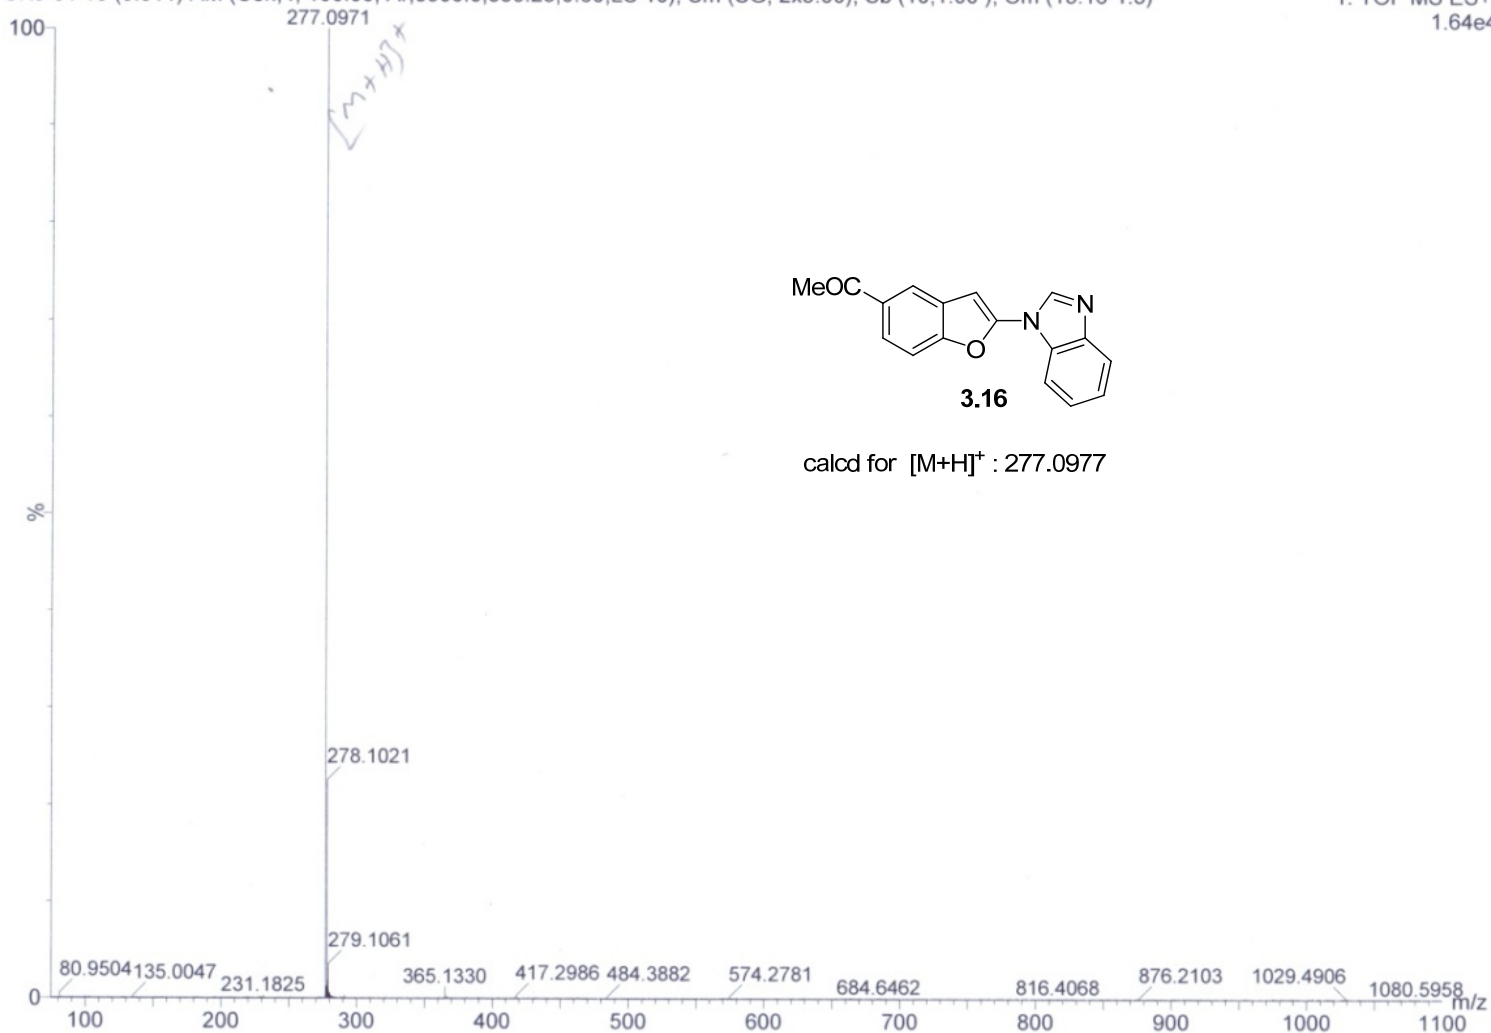

ESI (HRMS) spectrum of **3.16**

Electrospray ionisation -MS

WATERS Q-TOF Premier-HAB213

31-Oct-2016

15:54:20

SK5-52 16 (0.330) AM (Cen,4, 100.00, Ar,8500.0,556.28,0.45,LS 10); Sm (SG, 2x5.00); Sb (10,1.00 ); Cm (16:18-1:3)

1: TOF MS ES+  
1.39e4

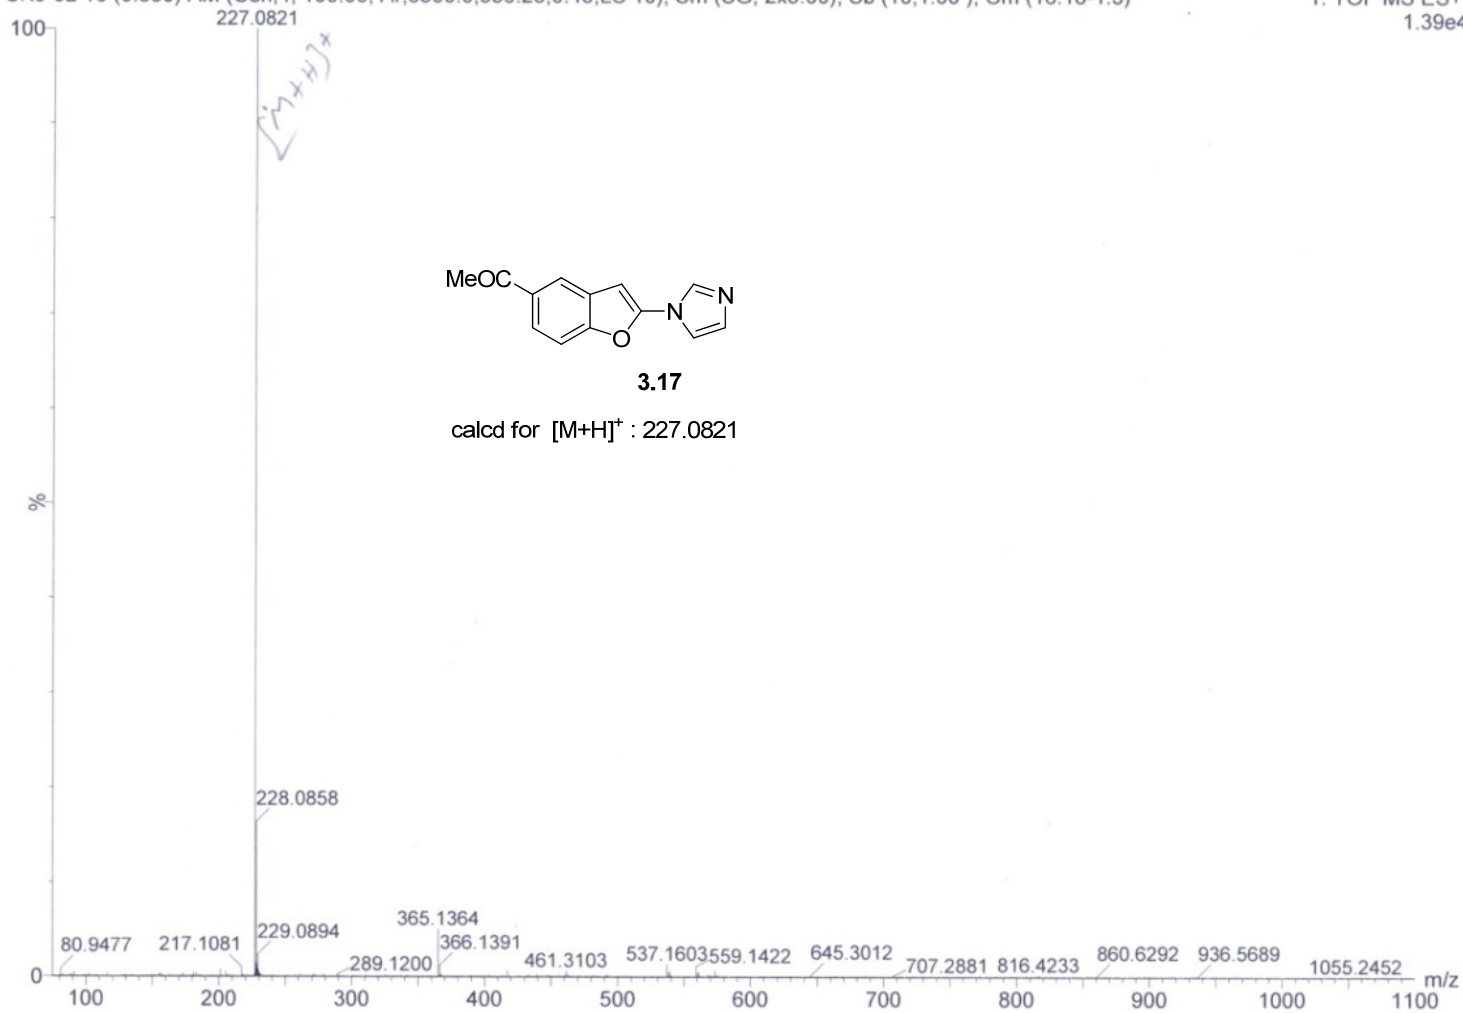

ESI (HRMS) spectrum of **3.17**

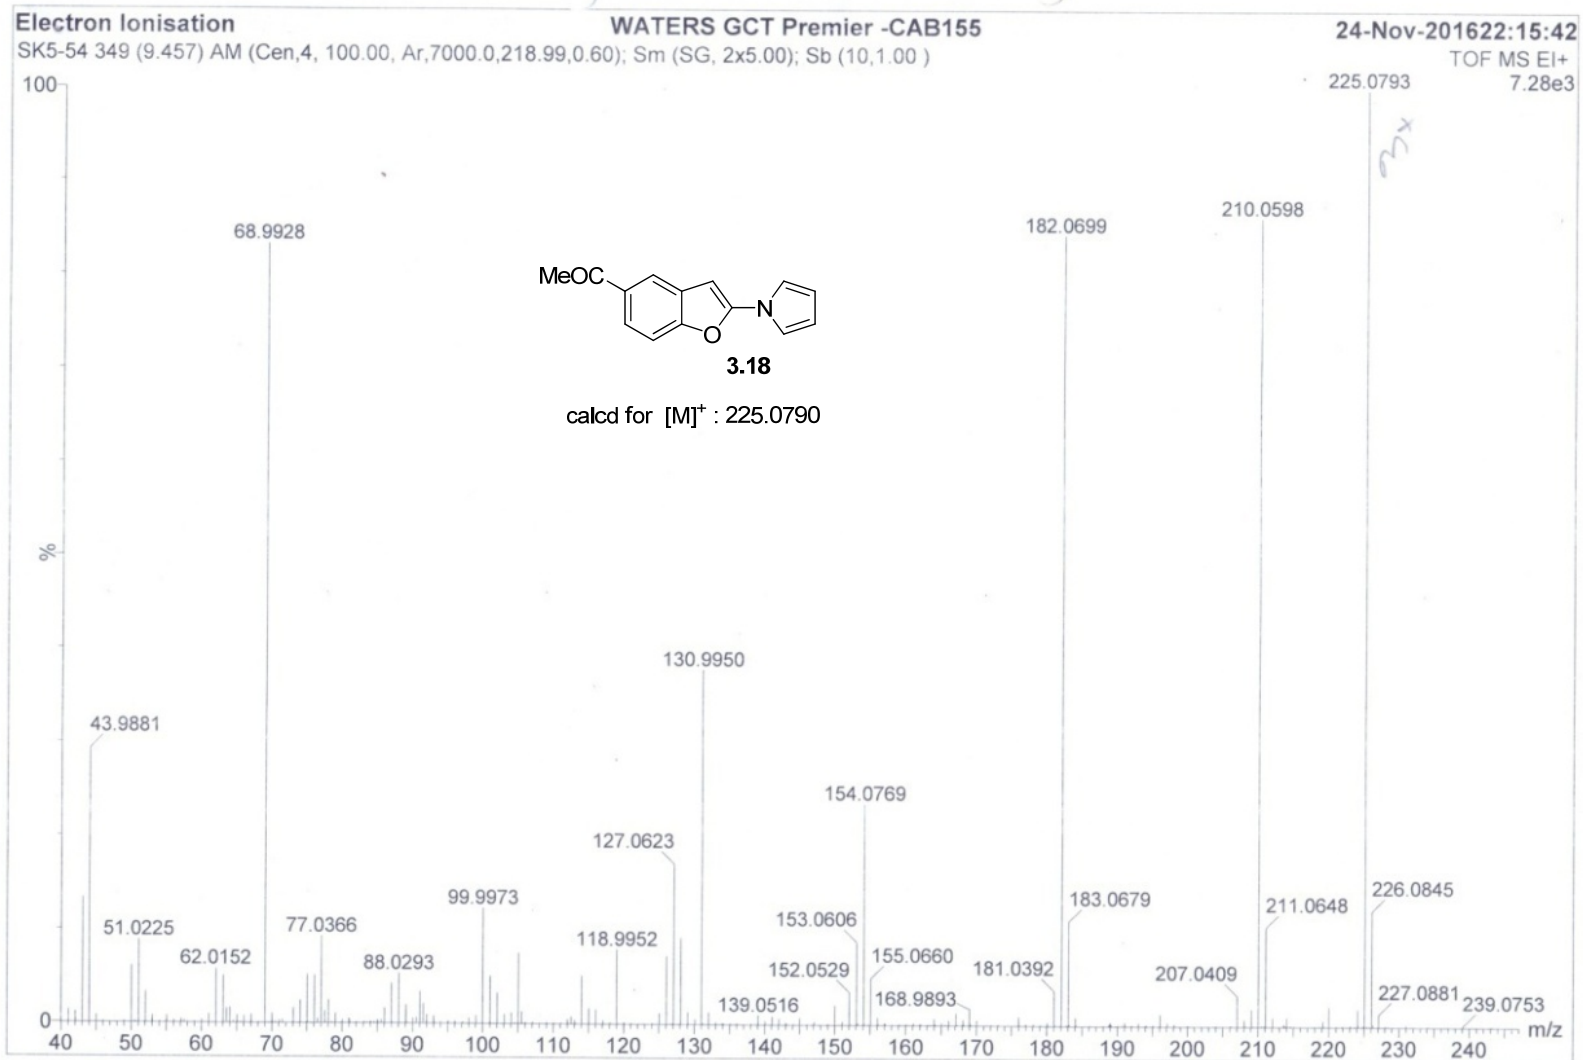

EI (HRMS) spectrum of **3.18**

Electron Ionisation

WATERS GCT Premier -CAB155

29-Nov-2016 01:54:45

SK5-6 744 (15.700) AM (Cen,4, 80.00, Ar,7000.0,218.99,20.00); Sm (SG, 2x5.00); Sb (10,1.00)

TOF MS EI+  
420.9046 1.77e4

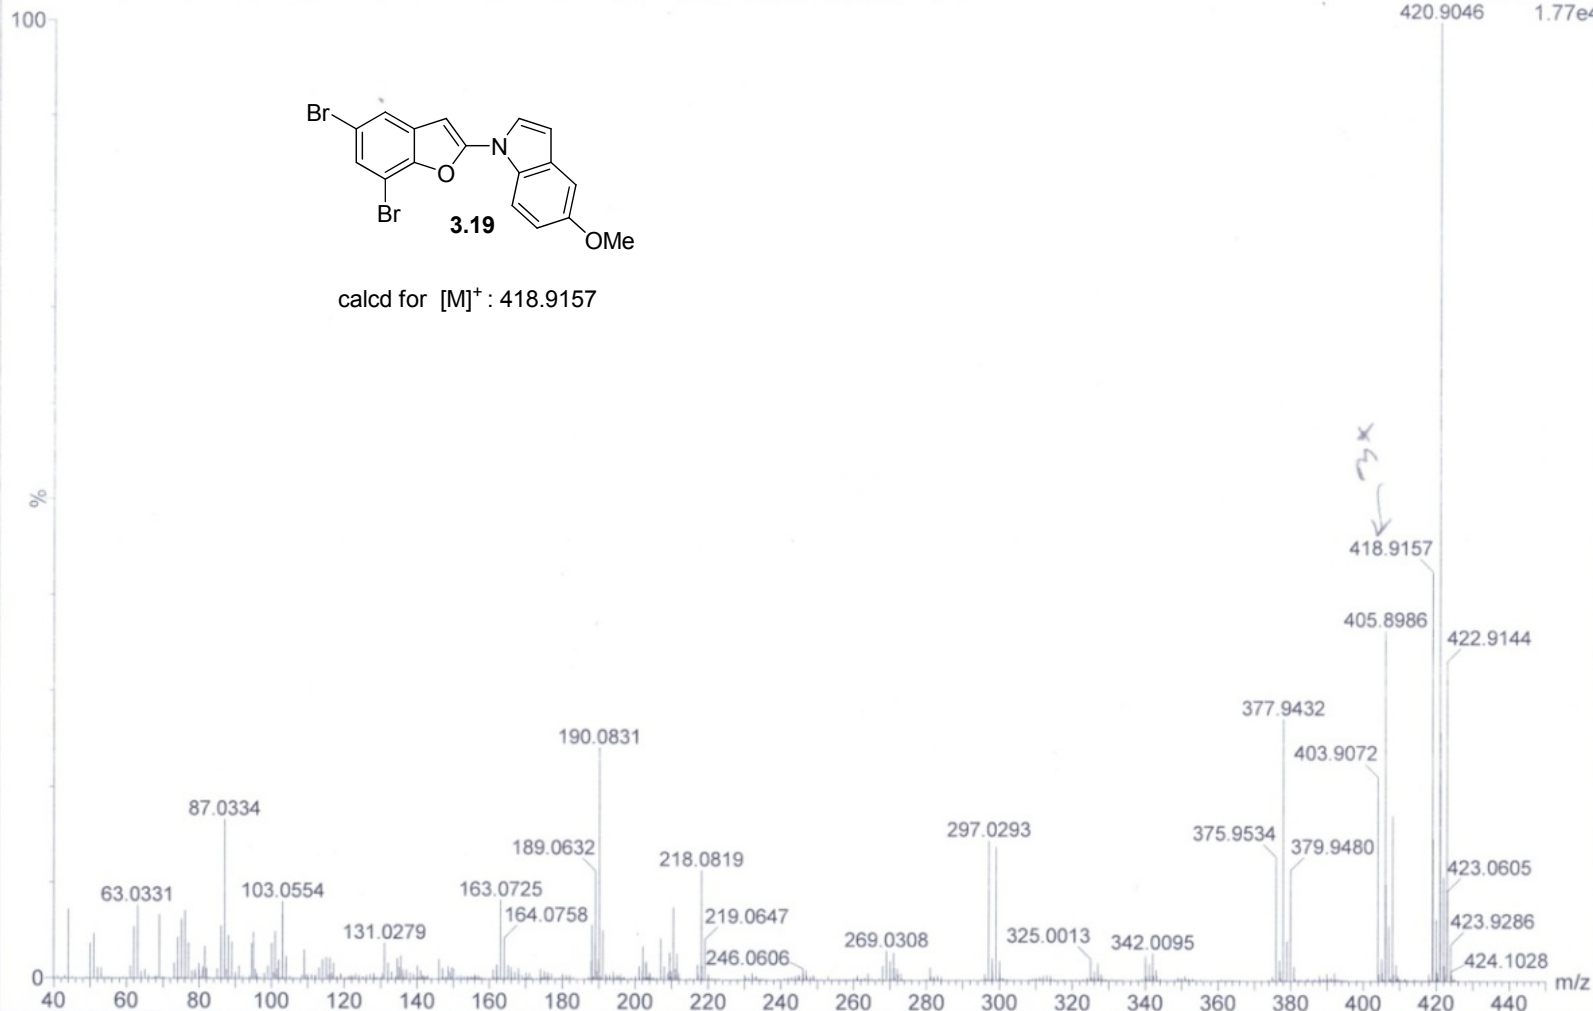

EI (HRMS) spectrum of **3.19**

Electrospray ionisation -MS

WATERS Q-TOF Premier-HAB213

30-Sep-2016

15:38:31

SK5-19 15 (0.313) AM (Cen,4, 100.00, Ar,8500.0,556.28,0.55,LS 10); Sm (SG, 2x5.00); Sb (10,1.00 ); Cm (15:16-1:3)

1: TOF MS ES+

1.16e4

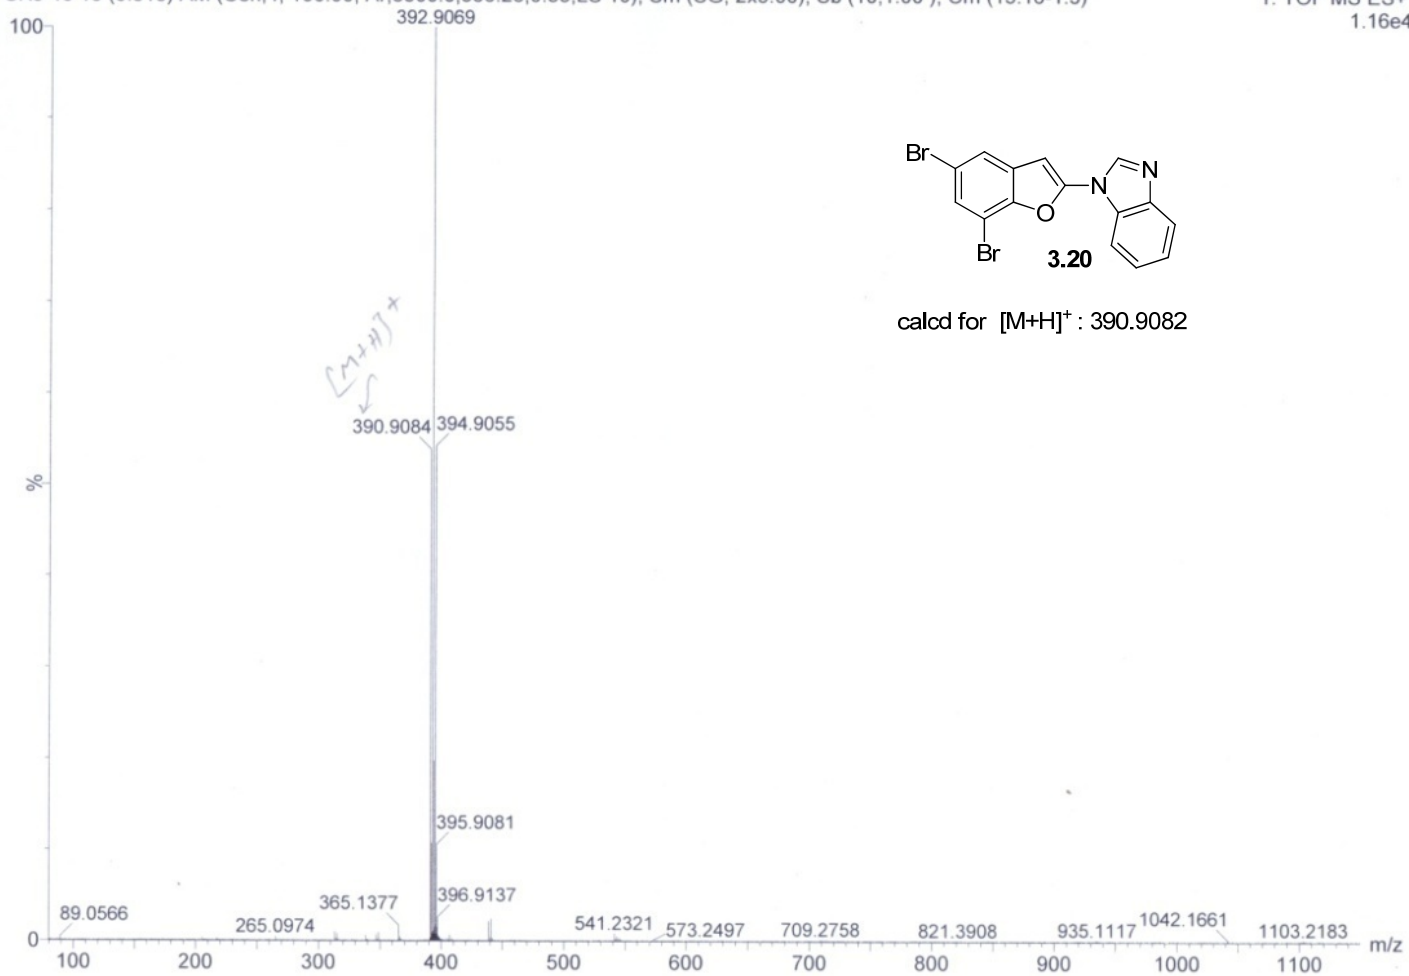

ESI (HRMS) spectrum of **3.20**



Electrospray ionisation -MS

WATERS Q-TOF Premier-HAB213

03-Oct-2016

12:18:54

SK5-23 12 (0.258) AM (Cen,4, 70.00, Ar,8500.0,556.28,0.50,LS 10); Sm (SG, 2x5.00); Sb (10,1.00 ); Cm (12:16-1:3)

1: TOF MS ES+  
1.65e4

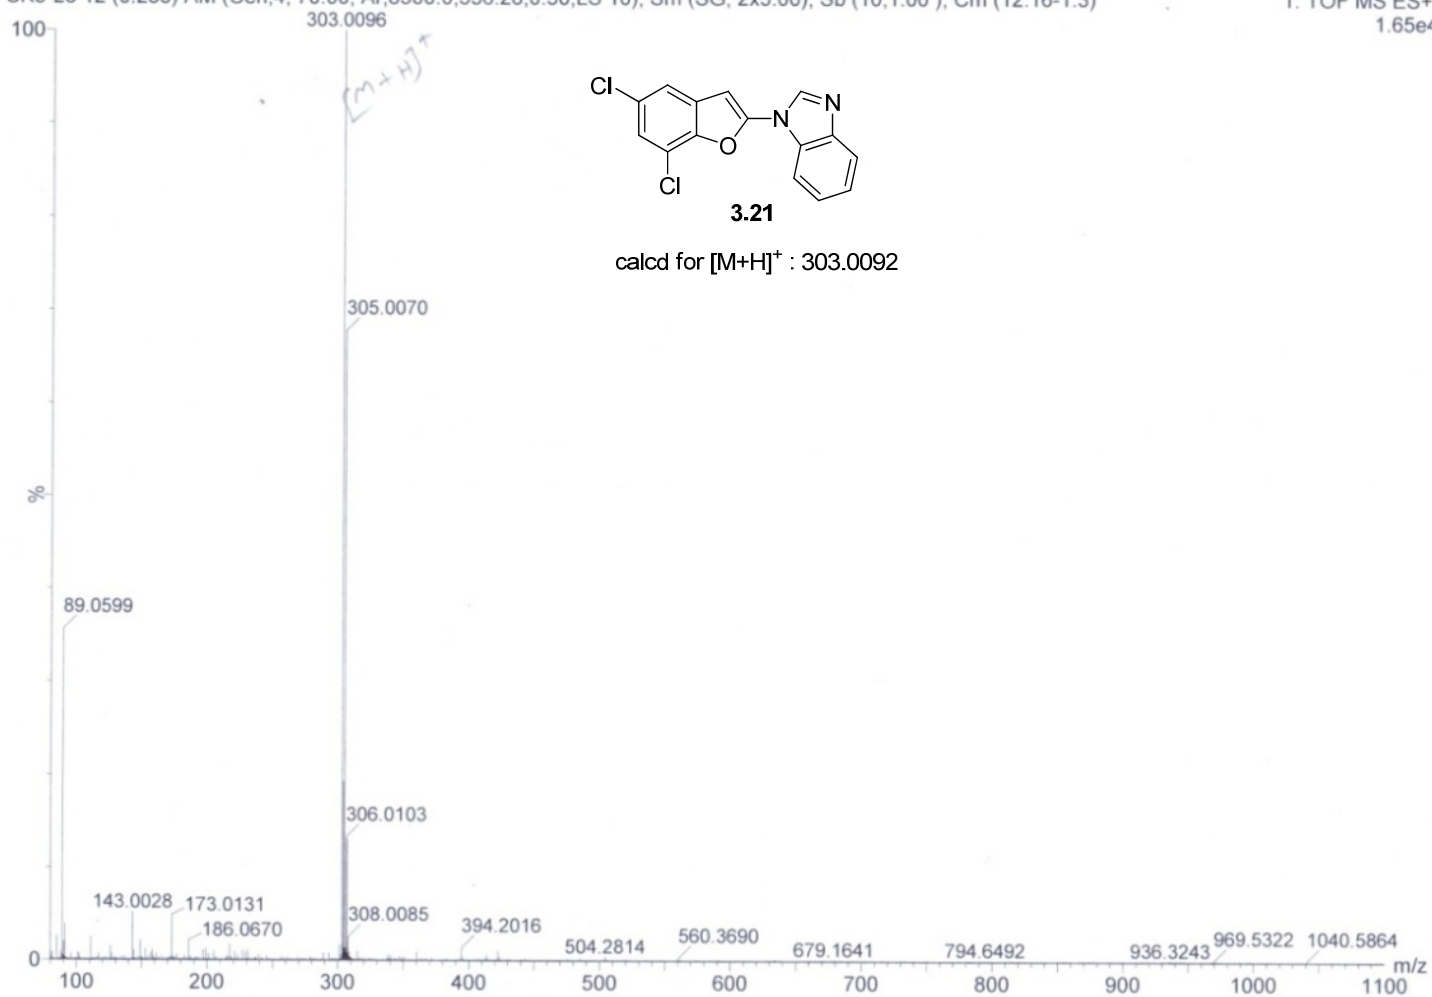

ESI (HRMS) spectrum of **3.21**

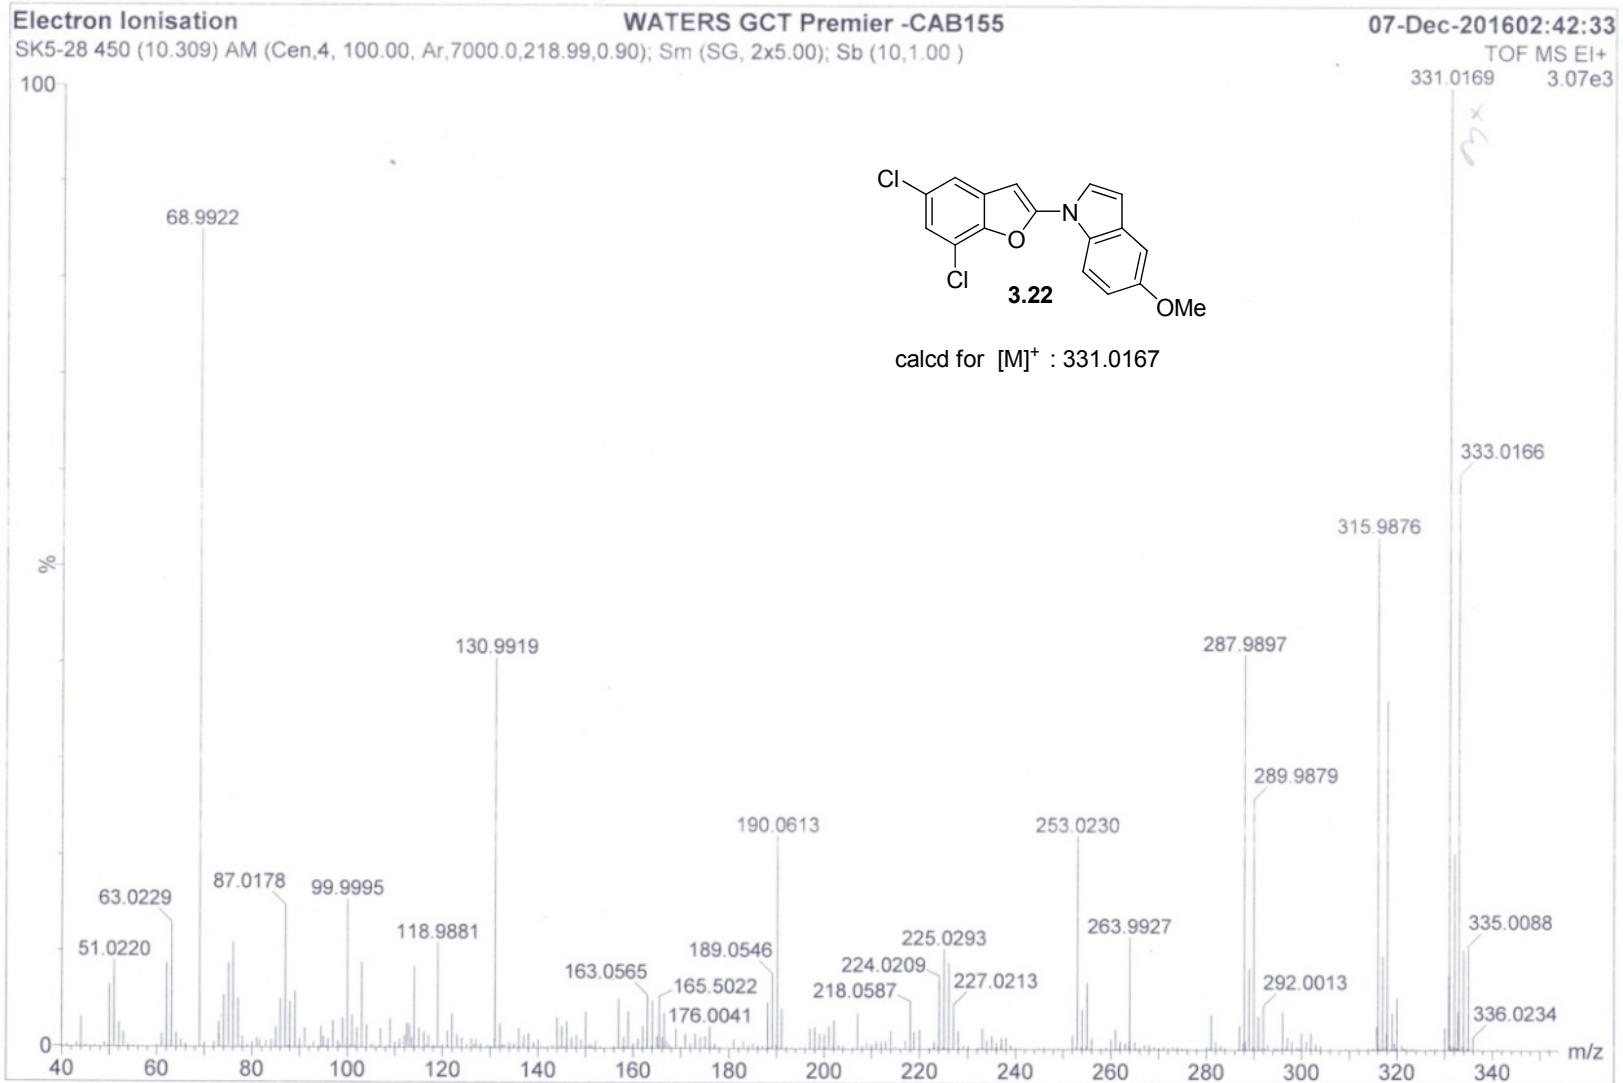

EI (HRMS) spectrum of 3.22

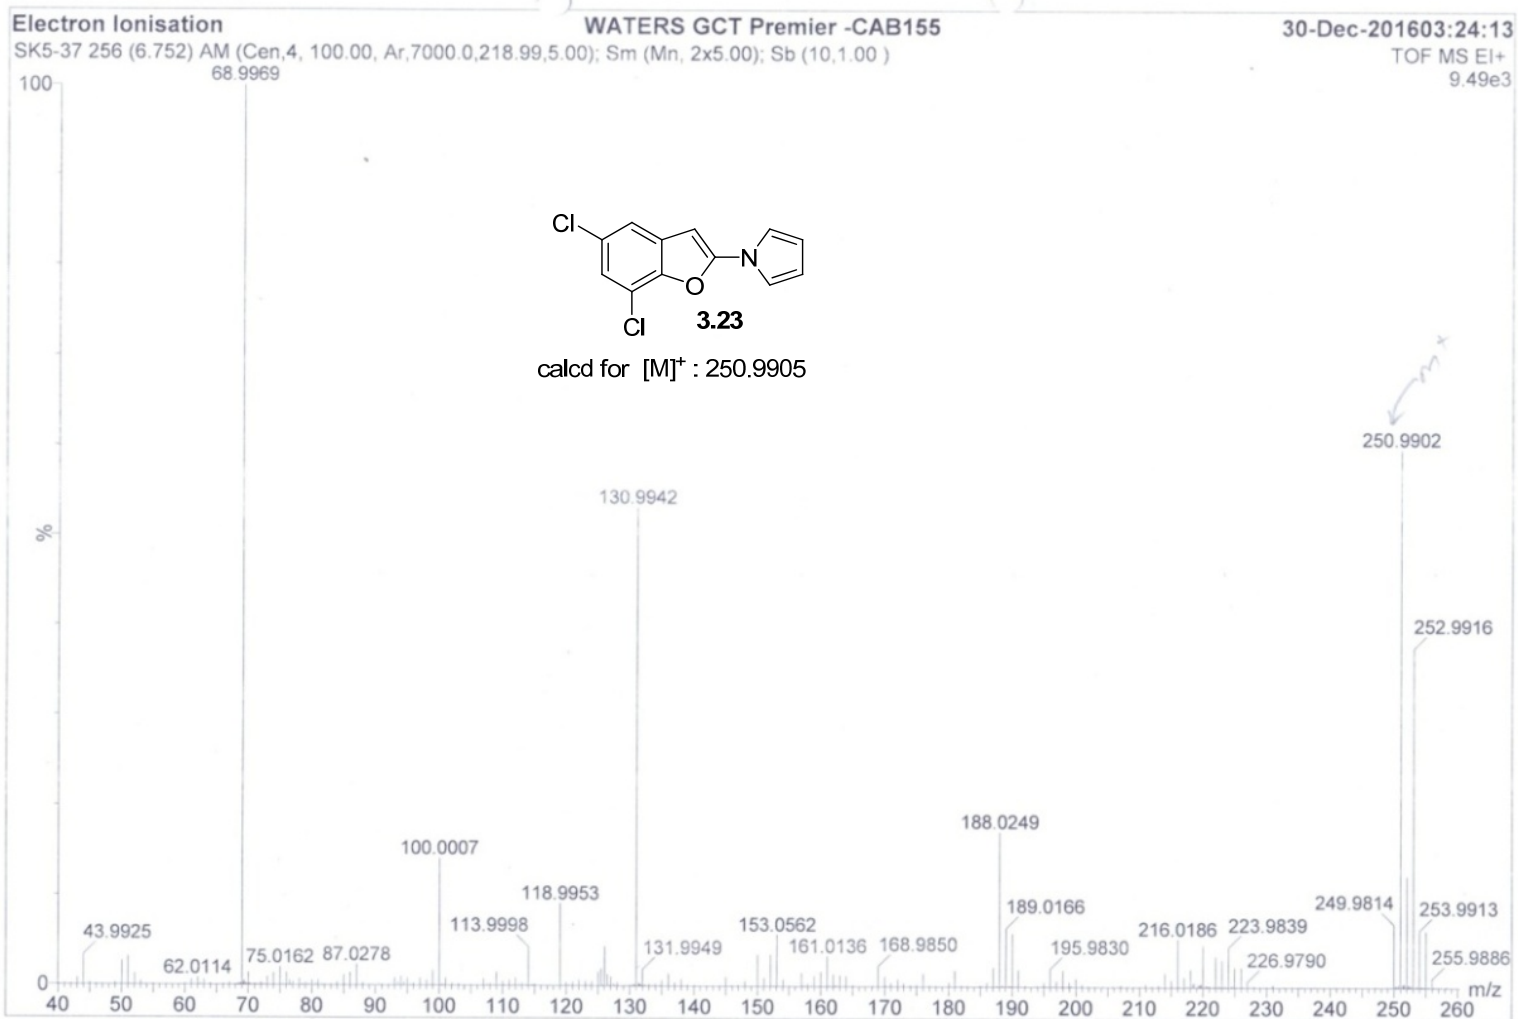

EI (HRMS) spectrum of **3.23**

Electrospray ionisation -MS

WATERS Q-TOF Premier-HAB213

02-Sep-2016

16:59:42

SK3-182 CH 8 (0.314) AM (Cen,4,1100.00,Ar,8500.0,556.28,0.45,LS 10); Sm (SG, 2x5.00); Sb (10,1.00); Cm (8:11-1:3)

TOF MS/ES+  
2.07e4

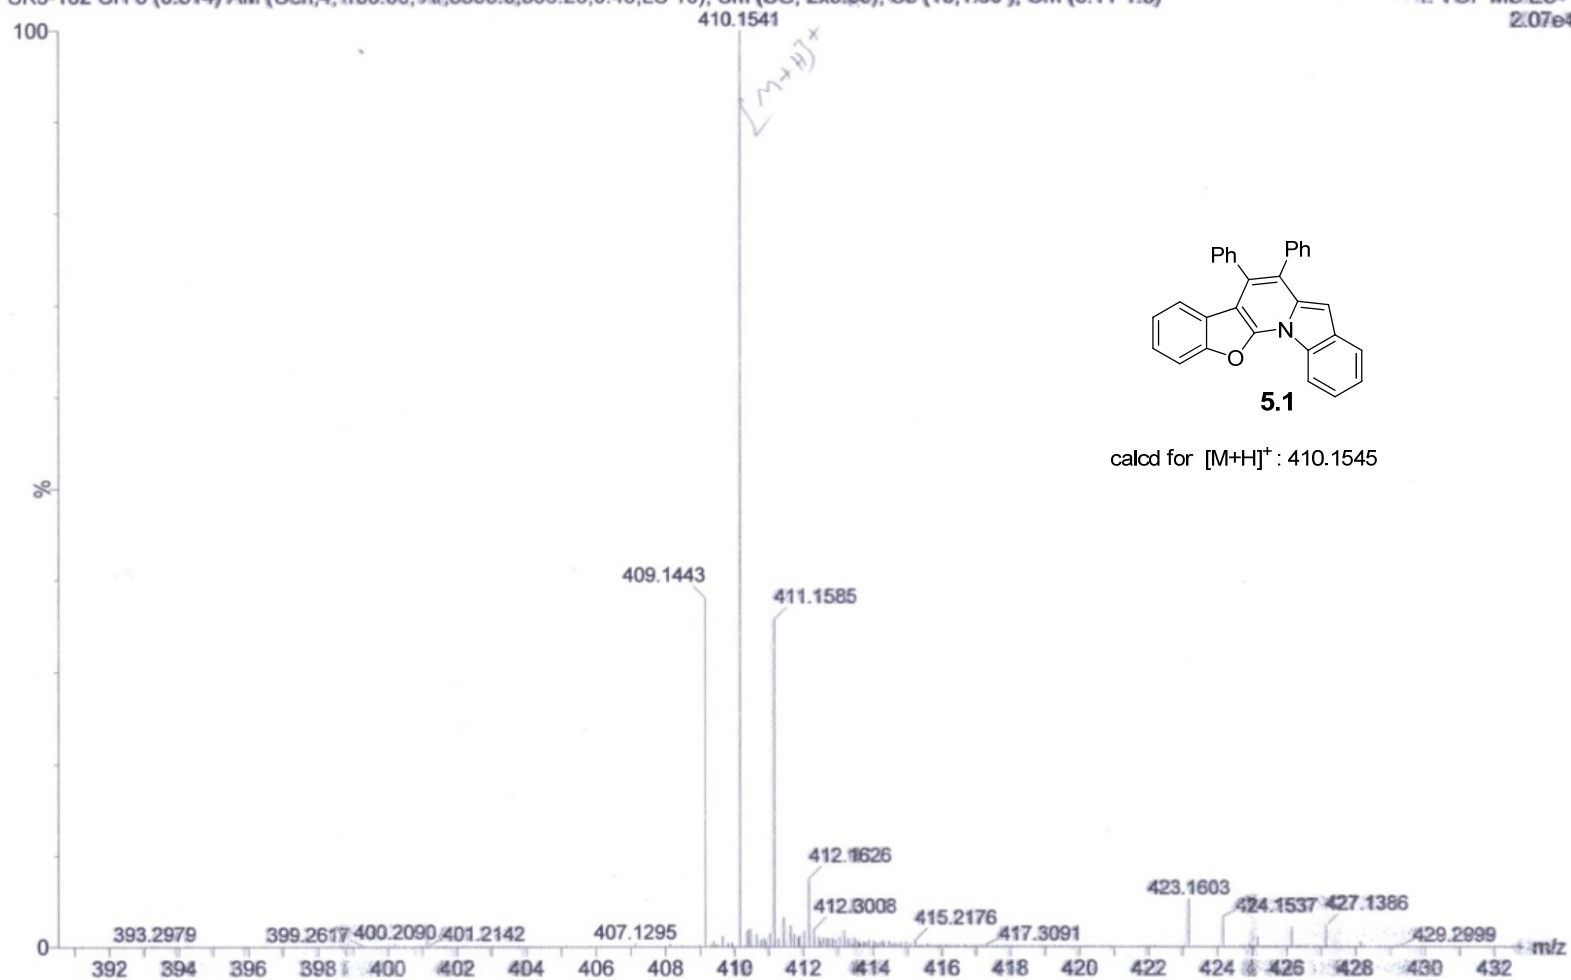

ESI (HRMS) spectrum of 5.1

Electrospray ionisation -MS

WATERS Q-TOF Premier-HAB213

01-Mar-2017

12:44:26

SK5-85 17 (0.368) AM (Cen,4, 100.00, Ar,8500.0,556.28,1.00,LS 10); Sm (SG, 2x5.00); Sb (10,1.00 ); Cm (17:19-1:4)

1: TOF MS ES+  
1.78e3

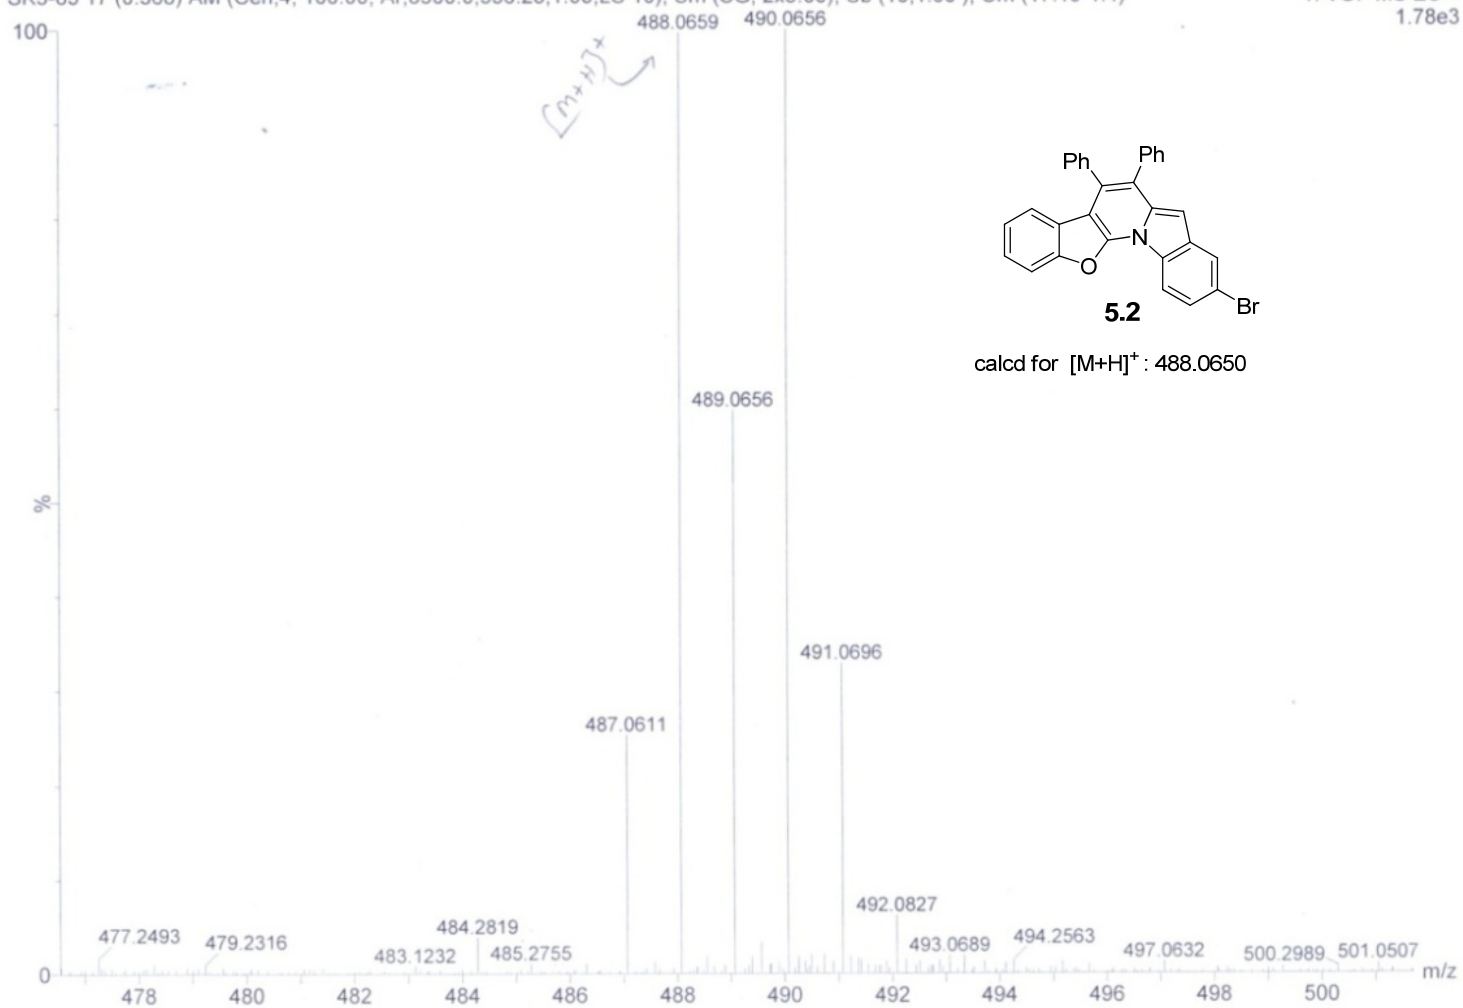

ESI (HRMS) spectrum of 5.2
